# Supplementary material for: Differential proteomic analysis of replanted Rehmannia glutinosa roots by iTRAQ reveals molecular mechanisms for formation of replant disease
Source: BMC Plant Biol. 2017 Jul 10;17:116. doi: 10.1186/s12870-017-1060-0 (PMC5504617; doi:10.1186/s12870-017-1060-0)
Supplement: Supplementary file 9 — Unique peptide sequences identified in the present study. (XLSX 2281 kb) [file 12870_2017_1060_MOESM9_ESM.xlsx]

## Sheet: Additional file 9
Additional file 9. Unique peptide sequences identifed in present study.
SP: replanted R. glutinosa (Second year planting)		FP: normal-growth R. glutinosa (First year planting)
Sequence	Protein Groups	Protein Group Accessions	SP-bio1/ ref(FP)	SP-bio1/FP Count	SP-bio2/ ref(FP)	SP-bio2/FP Count	IonScore	Charge	MH+ [Da]	ΔM [ppm]	RT [min]
gILGFTEDDVVSTDFVGDSR	1	CL1347.Contig1_All	1.0502	104	1.06579	105	123.42	3	2433.21	1.17201	78.1144
lFIGLAGLATDAQTLHQR	1	Unigene21413_All	1.00937	53	0.975138	53	120.19	3	2229.26	-0.625267	88.314
vFIGGDTSGANIAHNIAIR	1	Unigene6915_All	1.05331	3	1.73979	3	118.71	3	2230.22	-1.75051	64.887
dLQQEIADGDVEIPQD	1	CL5473.Contig1_All	1.14644	4	1.10193	4	117.09	2	2089.03	2.70811	67.4495
dLQQEVSDGDVEIPQD	1	Unigene5367_All	1.27627	1	1.19434	1	116.39	2	2091	-2.67103	60.1722
tVFTQQMGLTDQDIVALSGGHTLGR	1	CL1920.Contig2_All	0.904445	6	0.934481	6	114.77	3	2949.54	-0.427006	80.9094
aGELSNAEIDSLMVIVANPR	1	CL236.Contig1_All	1.04039	38	1.0661	38	113.56	2	2403.29	0.135219	89.5329
aLLDEIAVVATEEFR	1	CL962.Contig2_All	0.985287	31	0.994796	31	111.18	3	1980.09	-1.77069	106.053
vILSGAAPLASHVEEFLR	1	CL1211.Contig1_All	1.02817	13	0.928977	13	110.86	3	2213.26	-0.889075	87.162
yDLGVGDYLFTPAGDVHR	1	Unigene106_All	1.25989	10	1.0976	10	108.02	2	2299.16	-0.653681	73.0679
dLGGDSSTQEVVDAVIANLD	1	CL2556.Contig1_All	1.03521	4	0.936193	4	107.95	2	2322.15	-3.29225	97.7342
gYAADEQLGQALEGSDVVIIPAGVPR	1	CL1695.Contig2_All	0.996041	9	1.02386	9	107.73	3	2929.56	0.53311	78.7097
gTVELAGTDGETTTQGLDGLAQR	1	CL733.Contig1_All	1.01849	8	1.31732	8	106.99	3	2594.32	-1.83513	57.6267
vENQEGVANFDDILANSDAFmVAR	1	Unigene9808_All	0.923555	1	1.17904	1	106.46	3	2945.42	-1.67446	81.9194
lVAGLPEGGVVLLENVR	1	CL3885.Contig3_All	1.05731	20	1.18006	20	106.1	3	2039.22	3.65038	84.5571
sLPFLVTEGPDGYPLIHVR	1	CL1361.Contig1_All	0.94045	12	1.04711	12	103.31	3	2414.34	2.34893	85.5016
aADVIAAANTAAEVALR	1	CL4189.Contig4_All	0.967538	17	0.959951	17	103.21	3	1931.09	-0.359274	88.9565
tALHDcLEVIDDTLEELR	1	Unigene13722_All	1.05729	11	0.873669	10	102.66	3	2446.24	-1.18812	94.7713
hDELGQETLLNLLLR	1	CL8617.Contig3_All	0.977598	10	0.852096	10	101.65	3	2068.17	-1.45429	88.6428
aNTFVAEVLGLDPR	1	CL600.Contig2_All	0.924751	4	1.14686	4	101.62	2	1806.01	2.04654	90.3566
aVIDAATIAGLHPLR	1	CL1361.Contig1_All	0.966208	27	0.99549	27	101.62	3	1822.08	-1.42998	71.2846
qHIPLEDSSGAAAGLVHGDFR	1	Unigene14495_All	0.834305	5	0.828332	5	101.31	4	2481.27	-2.03399	59.4423
gNSGDQWSDLLGYAVAQR	1	CL3704.Contig4_All	0.853486	22	0.82447	22	101.19	2	2241.12	-1.4414	79.7909
gANEVDVQNLEFLDk	1	CL745.Contig1_All	1.1063	5	1.17576	5	100.68	2	2299.24	-0.530929	68.0418
sGQQVQEDAGAALDNAGEk	1	Unigene3183_All	0.995815	9	0.981923	9	100.45	2	2496.28	-0.333164	51.2689
aVSAIVYVVDAADHDNISISk	1	CL4076.Contig2_All	1.07808	15	0.867859	15	100.25	3	2795.54	-0.6511	93.7744
iAPSMLSSDFANLASEAER	1	Unigene511_All	1.1412	4	1.03275	4	98.78	3	2313.16	-2.93157	85.0137
yGLDDNTVDFIGHALALHR	1	CL5856.Contig1_All	1.01606	7	1.13907	7	98.71	3	2431.26	-2.02326	82.5935
hSIIGASGELSDFQEIMR	1	CL4952.Contig2_All	1.10823	5	1.16251	5	98.61	3	2294.17	-1.45635	73.8296
vFEVSLADLQNDEDHAFR	1	CL1534.Contig2_All	0.902102	24	0.980173	24	98.16	3	2409.19	-1.84716	84.873
eNAPAIIFIDEVDAIATAR	1	CL2860.Contig3_All	0.98903	14	0.975068	15	98.04	3	2333.27	-0.0717121	108.217
eHAPSIIFMDEIDSIGSAR	1	CL2430.Contig1_All	1.08652	10	0.91347	10	97.86	3	2392.21	-1.36521	82.5049
nILITGAAGFIASHVANR	1	CL2032.Contig1_All	1.02318	12	1.11195	12	97.73	3	2129.21	-2.05889	87.1741
lASVPAGGGAVAVAAPAGGAGGGAAPAAAAEAk	1	Unigene12005_All	1.19187	3	1.19875	3	97.71	3	3194.76	-3.88927	55.9066
vHALYGDTIDDNDR	1	Unigene11125_All	1.14003	5	0.938297	5	97.17	3	1907.94	-1.92657	48.8404
iLAENSGLDTQDVIIELTGEHDk	1	CL8683.Contig2_All	1.03682	6	1.05718	6	97	3	3118.67	-1.66532	84.4502
vFDVSLADLQNDEDHSFR	1	CL1534.Contig1_All	1.00801	27	1.04529	27	96.86	3	2411.17	-2.25562	80.3964
yAADEDAFFADYAEAHLk	1	CL1920.Contig1_All	1.27398	74	1.36122	74	96.71	3	2655.31	-2.89683	80.2603
aGELSNAEIDSLmVIVANPR	1	CL236.Contig1_All	1.14739	6	1.15878	6	96.24	3	2419.28	-1.55367	77.0441
gVDTLLGAAPLAGAVVk	1	Unigene10411_All	1.05095	15	0.871027	15	96.21	2	2160.33	1.94219	73.5921
tVLDAFFLGQAVGEALNAR	1	CL1606.Contig3_All	0.765237	10	0.933751	10	95.16	3	2296.25	-2.82718	104.332
lPTDVALLDDPEFR	1	Unigene7882_All	1.27347	4	1.14741	4	94.89	3	1905.02	-1.48825	75.314
sLGDGEAVEYVLEYGNDGR	1	CL3663.Contig2_All	0.988001	11	1.06606	11	94.47	2	2347.14	0.704403	77.0216
eSQIAVLVGSVTDDIR	1	Unigene12150_All	1.02113	17	0.984626	17	94.28	3	2006.11	-0.207696	88.5231
vLLSLGGATGSYSLSSADDAR	1	Unigene20951_All	1.17986	9	1.56696	9	94.08	3	2344.23	-1.77465	73.558
aVGLPTEDDMGNSEVGHNALGAGR	1	CL3344.Contig3_All	1.26623	3	0.927783	3	93.84	3	2671.3	-1.40034	55.1418
gSVPMSFGGTEQPAAYGELLSIGGLNPDVNk	1	Unigene5254_All	1.16175	2	1.07631	2	93.76	4	3713.93	0.18143	84.9439
aAQDIATAELAPTHPIR	1	CL1747.Contig1_All	0.974804	29	0.996746	29	93.53	3	2079.15	-2.09039	55.7297
vATPAQAQEVHFELR	1	CL570.Contig1_All	1.01877	33	1.07418	33	93.28	3	2000.09	-0.318775	56.3007
vENQEGVANFDDILANSDAFMVAR	1	Unigene9808_All	1.17702	1	1.10876	1	93.23	3	2929.42	-2.77355	88.4423
yGLAAGVFTQNLDTANTLMR	1	CL1239.Contig2_All	1.09065	5	1.02654	5	92.66	3	2460.28	-1.09094	83.6982
lALYDIADTPGVAADVSHINTR	1	CL1695.Contig2_All	1.02142	16	1.01918	16	92.31	3	2616.38	-3.74529	76.0434
iEGVSDELNSIASQNLDHAPAR	1	Unigene14339_All	1.00843	3	0.937859	3	91.76	3	2640.35	-2.34943	79.5785
vASPEQAQEVHIAVR	1	CL6560.Contig1_All	0.878303	8	0.829278	8	91.68	3	1938.07	-2.48908	47.3216
aEQLINDVLSEADTGGSGIVSk	1	CL9167.Contig4_All	0.919507	1	0.911647	1	91.59	3	2811.52	-1.25693	96.7992
gHQPPTVIDLNFSGSGPTPTPDQQMNR	1	CL1438.Contig1_All	1.06371	2	1.1402	2	91.45	3	3195.58	-0.766605	63.0138
fTQANSEVSALLGR	1	CL9614.Contig1_All	1.10888	20	1.04789	20	91.05	3	1796.98	-2.81479	75.0039
vPIDVFTGITDEDAAk	1	Unigene3116_All	1.05095	5	1.29428	5	90.83	2	2299.27	1.58684	74.4955
sLPPLFEETPNAIHELTLAR	1	CL1940.Contig1_All	1.02225	9	1.01788	9	90.68	3	2552.4	-1.93233	84.3699
fQEGVIGTPQLTDSIELPETIEFVGQk	1	CL2758.Contig2_All	1.02384	21	0.973281	21	90.68	3	3583.92	-4.87882	87.3478
iLLQGEFDEYQDVQAMHGTAR	1	CL3408.Contig1_All	1.28029	4	0.990235	4	90.5	3	2725.35	-0.445419	74.0732
sGFEGPWTANPLIFDNSYFk	1	CL1920.Contig1_All	1.22093	9	1.22531	9	90.43	3	2898.49	-2.51918	87.4928
vGDETFAQYMETTLk	1	Unigene18274_All	0.93569	15	0.851216	15	90.32	2	2341.22	-1.92603	79.2306
qFGYIVLTTSAGIMDHEEAR	1	CL6010.Contig1_All	1.00473	105	0.997803	103	89.92	3	2542.29	-2.51506	85.6773
hVVFGQVVEGLDVIk	1	Unigene17254_All	0.961087	112	0.950881	112	89.57	2	2247.33	0.827947	75.1132
aYEAATSSASTDLAPTHPIR	1	Unigene13904_All	1.16405	11	0.925576	11	89.48	3	2363.21	-1.34285	52.0986
vASHSLDSGAPLSEQTISQALATAR	1	CL4313.Contig1_All	0.96896	1	1.41738	1	89.26	3	2814.48	-1.89662	72.1064
qMGLSDQDIVALSGAHTLGR	1	CL1920.Contig1_All	1.02876	10	1.03042	10	89.05	3	2373.24	-2.76458	67.6243
lSQGEYVAVENLENVYGR	1	CL1211.Contig1_All	1.17535	4	1.062	4	88.84	3	2344.21	-0.329069	79.9356
dNLTLWTSDISEDAEEAQk	1	Unigene10076_All	1.08096	3	1.18872	3	88.39	3	2773.39	-2.43648	76.7848
fAVAAAPVAAAAPGAAPAAAAk	1	CL926.Contig1_All	1.19178	8	1.17745	8	88.36	2	2443.43	1.4066	57.4022
iLNLEEGGAFNVSSAEDLLk	1	Unigene7516_All	1.02487	4	0.961435	4	88.31	3	2727.5	-2.60854	88.108
vFLIGDSSGGNIVHQVAAR	1	Unigene21654_All	1.20129	1	1.91123	1	88.29	3	2244.23	-3.05615	69.5391
qYLSDSEAVTENALEFLk	1	CL3704.Contig4_All	0.814681	53	0.870349	53	88.12	2	2665.41	-1.87879	89.555
mVALFDHEEVGSDSAQGAGSPVMLDALSR	1	Unigene14935_All	0.891502	2	1.02971	2	87.91	3	3293.6	-2.79116	82.9622
aLAEAGLTIENIHSVEVVGSGSR	1	CL1361.Contig1_All	1.06377	15	1.08872	15	87.83	3	2613.41	-2.93047	78.7746
lVTEEQVAVALAQYTADLSEk	1	CL7243.Contig2_All	1.05674	6	0.846636	6	87.68	3	2886.6	1.15389	99.9885
vGDGFGEGVVQGPLINDAAVHk	1	CL1216.Contig2_All	1.18919	4	0.94134	4	87.67	3	2787.52	-1.15787	66.1686
aVSNVNSIIGPALIGk	1	CL7728.Contig1_All	0.925647	16	0.96323	16	87.63	2	2161.31	-1.27376	72.1696
sQIQLLMNELSNGHGLLNR	1	CL9222.Contig1_All	1.77032	11	1.02858	11	87.54	3	2441.32	-1.39911	88.1698
aLEVLNYLGALDDDGNLTk	1	CL9477.Contig6_All	1.02439	7	1.07852	7	87.52	3	2642.45	-0.642611	99.8412
nLANPTALLLSAVTMLR	1	CL1699.Contig3_All	1.2317	6	0.9593	6	87.42	3	2102.23	-1.32609	108.014
aGIVEVLDNLVk	1	Unigene18823_All	1.03166	30	1.0549	30	87.29	2	1878.15	-2.62438	91.6273
aAVAEEVAEGHGDVGPR	1	CL8737.Contig2_All	1.0813	9	0.953895	9	87.15	3	1968	-2.30368	56.7714
aVDTTGAGDSFVGALLHk	1	CL673.Contig4_All	1.19168	4	1.1203	4	87.09	3	2367.32	1.39186	74.8408
aQEQVVAGTLHHLTLEVVDAGk	1	Unigene20700_All	1.05611	72	0.967105	67	86.68	3	2923.64	-0.91786	87.0895
eVAAAVITEAIEEDLAEGYR	1	Unigene2765_All	0.915462	9	1.1248	9	86.65	3	2453.27	0.0021021	105.755
sTGFGLIYDSVENAk	1	CL9283.Contig1_All	0.897786	13	1.07796	13	86.37	2	2209.19	-3.32384	75.2758
aANAQAALAYQLYQk	1	Unigene13923_All	0.964324	7	1.10241	7	86.18	2	2232.26	1.36257	64.9328
aAQYFEQAYELEPQNELYk	1	Unigene19148_All	1.002	2	1.15817	2	86.05	3	2942.49	-4.6196	78.4606
vGGQAAAAEPAAPAEEAk	1	CL5912.Contig1_All	0.965892	3	1.11939	3	86.04	2	2246.22	-1.45343	39.4784
aAGVLENFEEGQk	1	CL1787.Contig2_All	1.12048	10	1.01318	10	86	2	2000.08	-5.89084	67.1872
kLEMDQEYEGNVEATGEDYSVEPAETR	1	CL2741.Contig2_All	1.1055	2	1.13464	2	86	4	3697.75	-2.46474	60.3775
tLTSLSGVSGFGFDLVR	1	CL9612.Contig2_All	0.998104	92	0.975194	92	85.82	3	2060.13	-1.18097	83.2008
aITLPGEGEIMDMMDVADPDAVHAVR	1	CL6846.Contig3_All	0.895384	5	1.06808	5	85.6	3	3057.5	1.08116	91.275
lAESLDDLALDIPSAk	1	Unigene17136_All	1.06053	5	1.18978	5	85.48	3	2279.29	-2.39026	87.0099
sSAGTTScLAmAAAPEGNVNSVLNVIASFQQQNHR	1	CL2303.Contig4_All	1.00094	1	0.454106	1	85.43	4	3950.93	-3.41956	90.299
vENLYEGPLDDAYANAIR	1	CL1787.Contig1_All	0.90954	13	1.00049	13	85.41	3	2327.18	-1.62103	75.5368
tLLSSAITNQETcLDGFSHSk	1	CL8108.Contig3_All	1.36989	2	1.0768	2	85.11	3	2917.51	-2.49516	73.0039
vTSAVHAADPVAIYETDR	1	Unigene18769_All	1.12717	11	0.856557	11	85.03	2	2219.16	-0.588391	60.0219
vSIIDNLDNAVEEAVHR	1	CL1585.Contig1_All	1.24759	8	1.15455	8	85.01	3	2198.17	-1.2318	91.3028
iVDDHAIIQDEAR	1	CL673.Contig2_All	1.28551	6	1.16546	6	84.8	3	1798.96	-2.24711	50.0609
yVQLPPEGVDVELLHDATR	1	Unigene701_All	1.01271	5	1.02397	5	84.71	3	2455.31	-1.91434	74.9894
aVFVDLEPTVIDEVR	1	Unigene9258_All	0.899265	24	0.791059	24	84.63	3	2006.11	-1.39509	79.0813
vFISDEFDELLPk	1	Unigene18800_All	1.12393	18	1.16918	18	84.58	3	2160.2	-1.9649	85.1701
gLGTQVIDEEE	1	CL2116.Contig1_All	1.23878	1	1.10156	1	84.51	2	1493.76	-2.52785	50.8748
nQGNTGDVNVFAQMIDDAEGLEk	1	CL6870.Contig4_All	0.739181	2	0.923435	2	84.27	3	3073.53	-3.06521	93.7638
dELLQTASEVFTNVGAGVLR	1	Unigene14439_All	1.01586	15	0.979859	15	84.22	3	2423.31	-1.15715	102.222
vVELGDQISNLTLADAQk	1	CL6161.Contig2_All	0.96473	2	1.09142	2	84.17	3	2522.43	-0.353934	83.2025
fFSQGYEAAFGPVDESAESk	1	Unigene14324_All	1.07656	1	0.989646	1	83.99	3	2774.38	-0.452255	75.8286
yGQDATNVGDEGGFAPNIQENk	1	CL7728.Contig1_All	1.12537	3	1.30774	3	83.91	3	2932.45	-2.09469	55.4814
iVNTLIDEQPLAIYELNk	1	CL3747.Contig3_All	0.847697	10	0.716681	10	83.67	3	2694.55	-2.64432	90.1674
nQYLNTEEFIDAVAEELR	1	Unigene2338_All	1.16319	2	1.11193	2	83.63	3	2458.24	-1.5934	101.383
lDSQLGGLLSEATSEEDFTGk	1	CL7269.Contig2_All	1.19767	1	1.14896	1	83.39	3	2805.46	0.619738	85.714
sTALDLLEGDDLTNFLAR	1	Unigene9876_All	1.01436	4	0.876814	4	83.36	3	2268.2	-0.359737	91.4061
aVVVDNLDNSSEIAIk	1	CL1528.Contig1_All	1.00091	14	1.0774	14	83.25	3	2295.29	-3.00109	113.529
tEIMSMFEDLTHDDQDSVR	1	Unigene14685_All	0.988858	5	0.877511	5	83.23	3	2573.18	-0.783283	93.1598
aITLPGEGEIMDmMDVADPDAVHAVR	1	CL6846.Contig3_All	0.888549	9	1.00034	9	83.04	3	3073.48	-5.45175	77.2419
vLNFAIDDAILEER	1	CL2847.Contig2_All	1.14233	10	1.06935	10	82.81	3	1922.05	-2.30055	86.2625
lFGVGDDFGEDDILGk	1	CL7940.Contig1_All	1.25576	3	1.23229	3	82.67	3	2305.21	-2.39292	81.194
sLITYVQNTAASVAk	1	CL2758.Contig1_All	0.909842	42	0.939235	42	82.64	2	2174.26	-4.00257	77.8111
qAFDEAIAELDTLSEESYk	1	CL868.Contig3_All	0.94762	3	0.881698	3	82.51	3	2767.4	-3.27716	95.1562
vVLTVGALHQVDSAALR	1	CL4970.Contig3_All	1.1372	3	1.12887	3	82.5	3	2053.21	-0.626126	72.0383
gEYDESGPAIVHR	1	CL937.Contig17_All	0.829768	8	0.670951	8	82.39	3	1733.87	-2.24111	38.7879
qDLPGALDDAAITEALELHk	1	Unigene178_All	0.872617	4	0.901314	4	82.28	3	2728.49	-1.76148	81.4465
aTQDSNSQVDAIFQVLHTR	1	Unigene19019_All	0.991725	10	0.983095	10	82.11	3	2434.26	-1.35797	77.5264
tMLELLNQLDGFEASNk	1	CL2430.Contig1_All	1.11772	4	1.16271	4	81.98	3	2531.36	-2.50789	95.3707
eAQEGVAVEIAEAVVGALR	1	Unigene12447_All	0.911765	4	1.05713	4	81.89	3	2215.23	2.07687	110.993
aIVQVFEGTSGIDNk	1	CL7428.Contig1_All	1.03447	4	1.11318	4	81.78	3	2186.22	-3.65955	72.4609
lEEGVVIANVDADk	1	Unigene18823_All	0.935527	5	0.946114	5	81.69	2	2080.17	-0.147726	63.5302
aDEVLVLENIETDTTk	1	Unigene5487_All	1.03701	3	1.47463	3	81.68	2	2398.31	-0.99332	78.3918
aPEYLALNDEVIQLVk	1	Unigene16124_All	1.36568	1	1.29631	1	81.57	3	2423.4	-1.49975	84.6966
vATHNMDDGAPLSEQTISQALATAR	1	CL6240.Contig2_All	0.970836	1	1.0588	1	81.51	3	2901.45	-5.32994	71.2726
fAADEDAFFSVYADAHQk	1	CL1920.Contig2_All	1.09388	32	1.16664	32	81.46	3	2640.31	-1.86311	82.2309
lQEVAVSTGEENEDILLDLk	1	CL4873.Contig1_All	0.93469	6	1.03283	6	81.3	3	2823.55	1.06015	84.4522
dLQDDFMGGAEIIk	1	CL1787.Contig1_All	0.94604	2	1.15519	2	81.25	3	2160.14	-4.62859	69.2033
qAFDEAISELDTLGEESYk	1	Unigene7197_All	0.884858	2	0.98611	2	81.19	3	2753.39	-3.01876	91.8707
eQGIQEIQQQIGEVNEIFk	1	CL4833.Contig1_All	1.02701	5	0.982315	5	81.05	3	2838.55	-0.00379788	89.5596
hSDVLENLSPTVR	1	CL5613.Contig3_All	0.830131	7	0.929591	7	81.01	3	1770.96	-2.83637	50.4147
aAQDIANVELAPTHPIR	1	CL1747.Contig3_All	0.994267	12	0.851088	12	81	3	2120.17	-2.28011	57.7854
lVSEADDLQANEPTSk	1	CL4608.Contig2_All	1.05182	1	1.09111	1	80.94	3	2325.23	-2.74593	56.4228
eQVVAGTMYYITLEAADGGQk	1	CL5162.Contig1_All	1.28541	19	1.06564	19	80.87	4	2852.49	-1.74645	91.9976
vANVESGGEFTVSSAEDILk	1	Unigene10106_All	0.990228	27	0.912114	27	80.86	3	2660.42	-2.77483	112.956
gILGYTDEDVVSNDFVGDSR	1	CL6712.Contig5_All	1.09344	2	1.32519	2	80.85	2	2462.2	1.81766	69.9696
vQPPVESLDQLATEGLTFASk	1	CL2567.Contig3_All	1.01363	4	1.07044	4	80.81	3	2838.57	-0.352593	93.4757
dFAVLDAMLESGk	1	Unigene229_All	1.16165	22	1.27471	22	80.8	2	2004.08	-4.17389	87.3236
aIAGAGVLAGYDk	1	CL2994.Contig1_All	1.08842	4	1.07136	4	80.77	2	1814.06	-2.87769	58.3765
gELLTALASFGHEMTLNEANR	1	Unigene14489_All	0.973283	13	0.975038	13	80.76	3	2578.32	-0.977039	97.524
iSNQLGLEAAVEATAEFLNk	1	CL1523.Contig3_All	1.07273	11	1.06415	11	80.69	3	2726.52	-1.19506	101.727
iPSAVGYQPTLATDLGGLQER	1	CL9614.Contig1_All	0.970782	16	1.00984	16	80.68	2	2490.34	-2.74408	70.8494
lPHGEQLLVDAPETIER	1	CL2458.Contig1_All	1.07135	6	0.930606	6	80.58	3	2221.21	-2.07189	64.137
lNDELYEVHQIMTR	1	CL198.Contig1_All	0.893411	5	1.08563	5	80.29	3	2065.07	-1.90002	79.0284
gFPFEIEDHPGQQTITLTR	1	CL7266.Contig1_All	1.00044	9	0.984037	9	80.19	3	2490.29	-1.24448	69.9678
qLFEDTGSPLIPLEEFR	1	CL9088.Contig1_All	1.43317	5	1.36708	5	79.89	2	2295.22	0.569139	84.6389
dFITLGDFIQSINVAEGk	1	CL7930.Contig3_All	0.738882	1	0.798724	1	79.84	3	2575.42	-2.33285	99.2685
vPGADDVTGEPLIQR	1	CL2847.Contig2_All	1.14518	4	1.17645	4	79.68	3	1871.01	-1.78776	53.0499
aGDTLVFNYNSAIHNVVAVNk	1	Unigene10010_All	1.16467	34	0.923706	34	79.63	3	2854.56	-2.77171	73.9496
eNTEGEYSGLEHQVVR	1	CL1699.Contig3_All	1.09447	5	1.02802	5	79.39	3	2151.06	-1.1803	50.4647
lMTLLSAAQTNQEScLDGFSHDGADk	1	Unigene13722_All	1.40085	16	0.884078	16	79.15	3	3417.68	-2.42588	85.5047
vEFGDATTAADPTGAHTISR	1	Unigene9780_All	0.786813	4	0.689612	4	79.08	3	2321.16	-2.76342	50.0467
sTVGGGVEDVYGEDR	1	CL7993.Contig1_All	1.05803	12	0.965138	12	79.04	3	1843.89	-2.13756	44.9201
vPTVDVSVVDLTAR	1	Unigene14047_All	0.93384	6	0.884201	6	79.03	3	1775.02	-0.945709	66.2711
tNVNPNEVGDIVVGTVLAPGSQR	1	Unigene16507_All	1.27921	4	1.08422	4	78.98	3	2640.43	1.36237	78.3085
lTPSGLLLSVLQQDSEIR	1	Unigene9614_All	1.24073	4	1.01789	4	78.95	3	2273.3	-0.20039	97.3414
fYVHDVPEGPAGENESVYEVAR	1	CL6722.Contig1_All	0.575142	1	0.653584	1	78.91	3	2768.34	-1.77945	61.1893
tVFTQQmGLTDQDIVALSGGHTLGR	1	CL1920.Contig2_All	0.971888	3	0.963769	3	78.88	3	2965.54	-0.150709	72.6156
vGEISDIVDTDSGVHIImR	1	Unigene9922_All	0.890565	1	1.17375	1	78.8	3	2376.23	-2.74875	73.8196
vYDVTPFLEEHPGGDEVLIMSTGk	1	Unigene702_All	1.28379	6	1.21146	6	78.77	3	3241.69	0.886454	83.1551
iALTDNSIIEQVLGk	1	Unigene14163_All	0.965482	10	0.997891	10	78.71	2	2222.32	-1.13481	88.831
aSITPGTVLIILAGR	1	CL5633.Contig1_All	1.00268	12	0.860153	12	78.62	3	1786.11	-0.264727	89.2353
gLVDELGAEAMMMDALDk	1	Unigene9673_All	1.12018	7	1.12458	7	78.56	4	2517.28	-2.61062	92.9078
sAFESSSGLVWTSGPAT	1	CL8421.Contig2_All	1.48361	34	1.14299	34	78.46	2	1987.99	0.0671266	67.4452
eADVDGDGQINYEEFVk	1	CL3160.Contig3_All	0.899108	34	1.06588	34	78.42	2	2536.26	-2.40504	64.4209
iLVFDEADHMLAQSGFR	1	Unigene16822_All	0.935017	6	0.821159	6	78.31	3	2253.16	-2.0253	92.8327
qAFDEAISELDTLNEDSYk	1	Unigene10076_All	0.921471	8	1.04638	8	78.29	3	2796.4	-1.86335	88.1237
gITMAVDAVVTNLk	1	CL2530.Contig3_All	1.02068	9	1.11546	9	78.26	2	2040.19	-2.97666	88.2915
nPGLANLLVDPEFAR	1	Unigene7665_All	0.933113	5	1.14234	5	78.24	3	1930.07	-1.0383	76.0761
gLVDELGAEAmMMDALDk	1	Unigene9673_All	1.14478	5	1.14265	5	78.15	4	2533.27	-2.99619	86.95
aTEVQLPAGGTFVIAHSLAESQk	1	Unigene21093_All	1.08765	1	1.208	1	78.09	3	2962.64	-2.1541	73.6268
gSHIAAHVFVGNPk	1	Unigene5487_All	0.952667	6	1.12377	6	78.08	2	2042.17	-0.840074	42.3687
lHGGTPANFLDVGGNASENQVVEAFk	1	Unigene3116_All	1.03627	5	1.11832	5	78.04	3	3279.72	-1.49622	75.9947
nAMIGGALTGALVSAATk	1	CL8484.Contig1_All	1.04659	9	1.06578	9	78.03	2	2254.31	2.91873	78.8188
aLVAGQmHVFR	1	Unigene13722_All	1.13583	12	1.0988	12	77.95	3	1548.86	-1.09595	46.133
hAVVTYDDFGAVPGTTSNEAEIINVISR	1	Unigene25809_All	0.825816	1	1.00631	1	77.9	3	3279.69	3.02566	79.233
hVVFGQVLEGMDVVR	1	CL9308.Contig1_All	0.986544	7	0.88304	7	77.89	3	1989.09	-1.50441	74.2622
iQVEHPVTEMISSTDLIEEQIR	1	Unigene14513_All	0.947737	6	0.896294	6	77.83	3	2871.5	-1.68573	79.5106
vAILGAAGGIGQPLSLLMk	1	CL1695.Contig2_All	1.12245	13	1.00224	13	77.68	3	2417.47	-2.16265	91.6431
aVEILSAMAVPVELSDR	1	Unigene5496_All	0.984858	6	0.957591	6	77.64	2	2104.16	-0.689533	93.9244
aADLAQPLVEAQIPFk	1	Unigene16618_All	1.12204	4	1.07281	4	77.57	2	2319.34	-3.68084	74.4851
sAEVVNLAIQELGGk	1	Unigene902_All	1.03522	12	1.11657	12	77.44	2	2136.25	-0.19044	86.5716
tLAGETVPTSPQQPESIVHNIVFWR	1	CL5328.Contig2_All	1.06444	4	0.986671	4	77.26	3	3110.65	-1.23045	81.8269
vLSTEEIDEHLTAISERD	1	Unigene11788_All	1.06091	17	0.998064	17	77.2	3	2361.21	-1.4204	71.5825
acPGVVScADILAVAAR	1	Unigene2890_All	1.49891	5	0.976324	5	77.05	3	2034.07	-4.07857	67.4886
hAVVSAIAASAVPSLVLAR	1	CL8545.Contig3_All	0.977419	11	0.911997	11	77.01	3	2136.28	-1.21285	76.2454
eHAPVALGAAGVAAVVAESYAR	1	CL7232.Contig2_All	1.01676	8	1.00426	8	76.97	4	2413.31	-1.55628	78.899
vVAAGANPVLITR	1	CL8517.Contig2_All	0.863757	5	1.08486	5	76.96	3	1584.97	-0.936949	51.247
fLDILQDLHGEEIR	1	Unigene9242_All	1.09004	6	1.06496	6	76.93	3	2002.09	-2.12984	92.373
iSGLIYEETR	1	CL9500.Contig1_All	0.942206	42	0.76755	42	76.88	3	1484.82	-1.86679	67.4893
hVLVILTDMSSYADALR	1	CL7428.Contig1_All	0.898665	12	0.936802	12	76.8	3	2208.2	-1.30133	93.9626
dEAQEYLDEYk	1	Unigene18800_All	1.29829	5	1.54909	5	76.76	2	2011	-4.3083	60.9059
rEGGYSGGGGGYGGGGGGYGR	1	Unigene21757_All	1.45672	1	1.1566	1	76.66	3	2138.98	-3.49881	32.8109
vNQIGSVTESIEAVk	1	CL7728.Contig1_All	1.01797	31	1.01232	31	76.6	2	2182.25	-0.567374	68.2567
dNLTLWTSDMQDDISEETk	1	CL1747.Contig1_All	0.860936	1	1.02904	1	76.59	3	2849.38	-5.13438	77.5864
kLNLPILPTTTIGSFPQTIELR	1	CL9612.Contig2_All	0.866407	17	0.902281	16	76.52	3	3060.82	-1.86826	82.3565
gVAVGSVEEVR	1	Unigene3116_All	1.02725	6	0.910857	6	76.37	3	1405.8	0.347634	41.5882
lSNQmGLEAAVEAAAEFLNk	1	Unigene13863_All	1.1421	3	1.53686	3	76.35	3	2730.45	-2.12819	102.748
tEImSMFEDLTHDDQDSVR	1	Unigene14685_All	1.06914	2	0.899751	2	76.21	3	2589.17	-0.606062	83.9403
eSFETGTLHLIGLLSDGGVHSR	1	CL3344.Contig1_All	0.936028	31	0.961809	30	76.21	4	2629.38	-1.57719	90.5051
gMILPFEPHSITFDDVR	1	CL745.Contig1_All	1.06207	8	1.06063	8	76.2	4	2278.18	-0.407743	77.1295
lLDDPLYLGLQEHR	1	Unigene2765_All	1.19301	7	1.1432	7	76.14	3	1986.09	-1.62661	75.7239
hDVTEPLLVEVDR	1	CL3930.Contig3_All	0.99923	6	0.732194	6	76.1	3	1825.99	-2.40247	56.8108
sFEILEGDGGVGTVk	1	Unigene251_All	1.34039	9	3.13818	9	75.98	2	2116.17	-3.83703	63.8761
fQEGVIGTPQLTDSIELPETVEFVGQk	1	CL2758.Contig7_All	1.00954	27	0.953052	27	75.98	3	3569.92	0.340754	84.6101
hVLQEkPAAASGTELETAISR	1	Unigene5574_All	0.846296	2	0.999622	2	75.93	4	2816.57	-1.23438	54.549
lANVAVDAVLDSVSIATTHR	1	Unigene16511_All	0.799992	4	0.921539	4	75.92	3	2356.31	-1.5951	105.425
iEEELGSDAVYAGASFR	1	CL7728.Contig1_All	1.1539	13	1.06387	13	75.89	3	2118.06	-1.0484	75.7499
dSVEPIFAAYGEIEDLHVVSDR	1	Unigene5205_All	0.996212	2	0.922395	2	75.88	3	2765.39	-0.567131	87.8369
dIIIATGSVPLVPk	1	CL1044.Contig3_All	0.927491	3	1.01897	3	75.85	2	2031.25	-6.21929	66.8678
iAGAAADLLDAASDYGk	1	CL195.Contig1_All	0.974291	10	1.03575	10	75.75	2	2230.22	-0.996168	90.7044
vYLNSDELLLNLQDLNR	1	CL3834.Contig3_All	0.973969	4	1.01416	4	75.69	2	2336.27	-3.12067	87.3389
gVDLDALLDMSTDELVk	1	CL6791.Contig1_All	0.980115	19	1.04653	19	75.68	3	2442.32	-2.6787	90.8264
eEPYIAEDIEEIINEk	1	Unigene21093_All	0.944088	5	1.18916	5	75.59	3	2542.33	-4.62016	94.8267
sSLLLHIDGTSPVAEDIGR	1	CL9325.Contig2_All	1.27497	10	0.954098	10	75.56	3	2284.24	-1.68818	69.7506
iLGLGDLGVQGIGIPIGk	1	CL8737.Contig2_All	1.10908	6	1.0375	6	75.54	3	2328.44	-2.23556	86.6892
mAEISPSAIPFPHR	1	CL7006.Contig1_All	1.33695	10	0.860121	10	75.48	3	1856.99	-3.49285	65.5547
yHLIIVQDGDPSk	1	Unigene11461_All	0.728153	2	0.703015	2	75.48	2	2397.39	-0.234056	53.4435
fDGALNVDVNEFQTNLVPYPR	1	Unigene9258_All	0.864838	5	0.821355	5	75.28	3	2712.39	-2.22046	83.9035
gALASENVDDVk	1	Unigene18800_All	1.26376	6	1.62362	6	75.17	2	1826.01	-1.85377	44.8154
eLPEQIDTSTYmPS	1	Unigene18266_All	1.20415	1	1.12737	1	75.16	2	1930.92	-1.92739	55.4655
fyVHDVPEGPAGENESVYEVAR	1	CL6722.Contig1_All	0.746058	3	0.680976	3	75.07	3	3072.55	0.668882	58.2908
kYEVPVDIEVLDMLDTGAR	1	CL2143.Contig1_All	1.04518	11	1.06412	11	75	3	2771.51	-1.69963	87.987
tSEMSAVGLLAAALQGIDIk	1	Unigene9906_All	0.959945	5	0.860475	5	74.93	3	2596.48	-2.48685	106.29
eNAPAIVFIDEVDAIATAR	1	CL2860.Contig2_All	0.973466	16	1.02234	16	74.79	3	2319.25	-0.377167	106.45
vLGAEELPVFALQDDR	1	CL8496.Contig1_All	0.917017	4	0.932055	4	74.77	2	2076.13	0.953269	81.0741
fANVDLVDEVIELDk	1	Unigene7547_All	0.941598	3	1.20678	3	74.74	4	2327.29	-1.66486	90.3597
yIPSNTFSYYDQMLDTTAMLGAVPPR	1	CL9612.Contig2_All	0.680593	10	0.838935	10	74.73	4	3559.81	-0.253593	88.5627
gmILPFEPHSITFDDVR	1	CL745.Contig1_All	1.11973	6	1.19116	6	74.71	3	2294.17	-1.93378	72.2786
aAVAVLGDLADALGSNIk	1	Unigene2762_All	1.05813	7	0.943989	7	74.69	3	2306.35	-2.89032	102.012
vLTALEDAGVFTSGGLVk	1	CL6016.Contig1_All	1.21141	2	1.1622	2	74.59	3	2385.38	-4.13146	95.3963
aMAELGLLYLGmGVSGGEEGAR	1	CL6554.Contig1_All	1.21862	4	1.25545	4	74.53	3	2501.27	-0.212673	87.8412
qATNQALQLLQDNYPEFVAk	1	CL759.Contig4_All	1.12414	5	0.994077	5	74.48	3	2899.57	-1.7732	82.45
vGLTGLTVAEHFR	1	CL9614.Contig1_All	1.02505	136	0.991581	136	74.46	3	1703.97	-2.22536	68.3383
vGDALEFVHR	1	CL4715.Contig2_All	0.772401	8	0.762322	8	74.44	3	1446.8	-3.04293	61.4385
iDAFVSGIGTGGTITGAGk	1	Unigene7518_All	1.05781	3	1.20537	3	74.43	3	2330.31	-4.37413	74.8113
mELVDAAFPLLk	1	Unigene3007_All	0.932229	55	0.979401	55	74.39	2	1955.14	-3.4634	95.1864
dFPAVVLNSVEATLDR	1	Unigene16722_All	0.937987	5	1.11019	5	74.29	3	2050.11	-1.40585	97.5629
iDDFGSLcGPVLDEVR	1	CL8328.Contig1_All	1.4716	4	0.857095	4	74.29	3	2096.06	-1.86482	75.4648
fDLSNVEFPDSLSTLDLNHNR	1	Unigene18884_All	1.12678	1	1.34686	1	74.25	3	2737.36	-6.25891	80.5796
nLLLAHAAAVHLYR	1	Unigene8202_All	0.720492	9	0.919339	9	74.18	4	1866.1	-0.582352	62.9878
kTDDLFADEEASGGLLR	1	Unigene3479_All	1.0158	1	1.06235	1	74.18	3	2445.3	-4.22672	64.7329
lGGATAEIMSDLLAFEADR	1	CL1926.Contig1_All	0.97822	2	0.974391	2	74.11	3	2284.17	-2.65835	109.504
yAVGLAETHAR	1	Unigene756_All	1.13621	3	1.12127	3	74.07	3	1491.82	-2.2939	45.4512
aHPTVFNTLLQVLDDGR	1	Unigene2756_All	1.42493	2	1.00299	2	74.06	3	2200.2	0.56512	94.1944
iINELLGNINLk	1	Unigene18791_All	1.02955	14	1.03316	14	74.01	3	1962.21	-6.35211	94.7399
lSYGGAQEYFGITPDLTTLGk	1	Unigene12084_All	0.778261	1	0.946926	1	73.9	3	2839.54	1.67882	80.8896
yFVEEVITGFDETDLHR	1	CL7708.Contig1_All	1.07246	5	0.964375	5	73.88	3	2374.18	-1.32733	93.033
lNLEAVGVELDk	1	CL6244.Contig1_All	1.10836	5	1.3502	5	73.87	2	1908.12	-3.25377	70.4702
dLLAGAVLDVPLR	1	CL1461.Contig2_All	1.26332	7	1.19999	7	73.85	3	1656	0.976244	76.4717
lISDYLIPSAASSESk	1	CL1747.Contig2_All	1.02858	4	1.05742	4	73.84	3	2289.28	-0.996075	73.2159
lAYVALDFEQESETAk	1	CL937.Contig17_All	1.10136	29	1.09695	29	73.8	3	2422.29	-3.87772	86.0954
tHVVTTPGSGFGPGGEGFVR	1	CL2365.Contig1_All	0.94661	8	0.945048	8	73.71	3	2263.17	-2.51695	54.469
iEVDQETVDLLEALGmk	1	CL7427.Contig1_All	0.881409	4	1.28973	4	73.64	3	2527.37	-3.05952	93.4036
lLTDLAAAVDEEDIAk	1	CL8905.Contig4_All	0.968509	7	1.16787	7	73.63	3	2295.28	-3.69705	90.7699
aGEDADTLGLTGHER	1	Unigene21337_All	1.06703	4	1.01565	4	73.57	2	1845.92	-4.75877	42.7401
hFLALVEDSSADTVSk	1	Unigene16215_All	1.01099	4	1.14199	4	73.51	3	2327.26	-2.30465	67.682
nVTINDNFFPGHFPER	1	CL982.Contig3_All	1.05246	5	1.04116	5	73.49	3	2208.11	-3.2175	67.1729
qGQAHVALNDIDSAVESFR	1	CL4305.Contig1_All	0.968806	1	0.967133	1	73.35	3	2361.21	-1.36752	76.455
vFIMGEEVGEYQGAYk	1	CL4460.Contig3_All	1.10542	25	1.16111	25	73.27	3	2428.26	-4.04426	78.6298
yIPSNTFSYYDQmLDTTAmLGAVPPR	1	CL9612.Contig2_All	1.00178	1	0.96904	1	73.17	3	3287.59	0.736547	77.0988
aIFGSDPLVLPDLLTNSFQLDGk	1	CL1670.Contig1_All	1.76306	10	4.85209	10	73.15	3	3068.7	-3.29728	99.6663
dGVSEGQFNQVLLHEMDAIR	1	Unigene16969_All	1.02981	5	0.887712	5	73.08	3	2562.29	-1.82118	81.2477
iEVDQETVDLLEALGMk	1	CL7427.Contig1_All	0.925289	9	1.17202	9	73.05	4	2511.38	-1.65805	99.6639
vDDHIGVAIAGLTADGR	1	CL4846.Contig1_All	1.0304	18	0.984308	18	73.01	2	1984.08	1.23271	66.3484
gITVEAPFDVFEENQQFR	1	CL2205.Contig2_All	0.979501	2	0.824512	2	72.97	2	2430.22	-1.18843	80.4021
iQFSLEHAFGDSDFTPAGTFSAR	1	Unigene14567_All	1.16206	2	0.971661	2	72.94	3	2805.37	-2.15963	82.9475
gFGHVEFASAEAAEk	1	Unigene16676_All	0.885105	6	1.14557	6	72.93	2	2158.14	-0.899299	53.96
lASVEVDLPAMMAQk	1	Unigene18627_All	1.19884	3	1.50608	3	72.92	3	2211.23	-3.97588	81.0646
dVLDGSSVGFVETLENDLAk	1	CL3344.Contig3_All	0.898266	3	1.34298	3	72.9	3	2716.44	-3.92167	93.9429
kGSSVAIFGLGAVGLAAAEGAR	1	CL6693.Contig23_All	0.994143	23	1.05531	23	72.84	4	2610.51	-2.20994	80.849
vDTTTSAGLDYTDIPHSQIR	1	CL2254.Contig4_All	1.29167	3	1.03933	3	72.73	3	2494.27	-1.39964	56.9728
hLPVSNISEIPDLDDEYR	1	CL7218.Contig1_All	1.01451	3	0.982121	3	72.68	3	2416.23	-1.86919	67.1767
eYQIIDALVGPSLk	1	CL5255.Contig1_All	0.90519	7	1.00695	7	72.62	2	2154.26	-1.1724	85.2487
mTAEIGTQVQIVGDDLLVTNPk	1	CL7728.Contig1_All	1.15923	4	1.2535	4	72.57	3	2966.64	2.25011	77.1198
vQEAQDEVEDIVESLAk	1	CL4023.Contig1_All	1.02898	1	1.31469	1	72.56	3	2510.33	-5.11488	102.316
iQILTSHTLEPVPIAIGGPGLAPGVR	1	CL3344.Contig1_All	1.02805	7	1.0833	7	72.53	3	2910.7	-1.16883	81.6587
iHFMLSSYAPVISAEk	1	Unigene9258_All	0.926337	13	0.777443	13	72.52	2	2401.34	-1.78808	77.9763
sVNDVIFEVVDGDAR	1	CL2340.Contig1_All	1.29471	7	1.19021	7	72.39	2	1939	-1.76141	81.6752
qHDATPTISPTANR	1	Unigene702_All	1.15163	4	0.729792	4	72.37	3	1812.95	-1.79293	31.768
iLELYDGFEGLk	1	CL5535.Contig5_All	1.10165	12	1.26015	12	72.35	3	2005.14	-3.1356	91.0831
vLQAQDDLVNSMk	1	CL8316.Contig2_All	1.08613	4	1.0992	4	72.31	2	2069.15	-0.827913	66.1759
yDDLSEQSFYmVGGIDEVIAk	1	CL9614.Contig1_All	0.894273	3	1.21974	3	72.3	3	3003.51	-1.05416	78.0708
aGLANLYQEGSMLTFEGQk	1	Unigene11883_All	0.915598	4	0.967841	4	72.2	3	2665.41	-2.30382	78.1053
aLFGESNEFVGDk	1	CL570.Contig1_All	1.02366	16	1.14524	16	72.15	2	2021.07	-3.51681	62.1499
aDLLATcPHGLQVR	1	CL757.Contig2_All	1.47424	25	0.905478	25	72.13	3	1855.01	-1.77504	56.7971
aVIVATNMLESMIVHPTPTR	1	CL5670.Contig2_All	0.923817	11	0.877287	11	72.02	3	2484.36	-1.3704	103.687
gQALADEYGIk	1	CL3803.Contig3_All	0.979078	3	0.965643	3	71.95	2	1772.99	-3.17248	54.4823
eVELEDPVENIGAk	1	CL8517.Contig2_All	0.851047	5	1.11148	5	71.94	2	2150.17	-4.62181	58.742
tVPHLADAIHAAVTR	1	CL5212.Contig1_All	0.80997	12	1.02613	12	71.85	4	1876.07	-1.16155	62.3993
fLDILQDLHGEDLR	1	CL962.Contig2_All	1.05777	25	1.04162	25	71.85	2	1988.07	-1.4194	92.6271
qPIVNAVIDGDDIIYR	1	Unigene16287_All	1.23925	6	1.24083	6	71.84	3	2105.15	-0.303329	75.8699
nLPSTVTSLDILQEFEGFGk	1	Unigene18579_All	1.02892	2	1.04586	2	71.83	3	2803.53	-2.09488	94.3552
nVGPSGVTIAIIR	1	Unigene14427_All	1.00238	4	0.99594	4	71.81	3	1600.97	-0.988794	57.8147
dDSYITALDAVLEk	1	Unigene9876_All	0.787651	3	0.995345	3	71.8	2	2161.18	-0.121872	85.9343
vNVYELSVEELk	1	CL8671.Contig1_All	1.17581	9	1.07325	9	71.78	2	2030.16	-0.480945	74.0012
iNVAIPLLEAGLAk	1	Unigene3223_All	0.921861	18	1.31597	18	71.69	3	2030.28	-2.50056	92.1778
nEWGFTQYPIVPGHEIVGEVTEVGSk	1	CL2602.Contig2_All	1.48924	4	1.92256	4	71.64	3	3480.82	-0.496251	77.3785
rVDDATVAIR	1	CL8421.Contig2_All	1.53608	34	1.0196	34	71.63	2	1419.82	-1.96346	35.7595
kQDITITGASTLPSDEVER	1	CL2379.Contig1_All	0.970489	3	0.843814	3	71.63	3	2668.45	-3.32496	54.3428
tEDELLEAIAMATSTHk	1	CL1523.Contig2_All	1.2017	3	0.986656	3	71.62	3	2468.32	0.192566	89.7676
aNPVALLLSSAmMLR	1	CL2556.Contig1_All	0.899993	5	0.782097	5	71.58	3	1907.08	0.55858	100.487
vVVADTFQDLVFNSGk	1	CL689.Contig1_All	0.982941	16	1.03741	16	71.57	3	2347.3	-2.92485	87.8806
sEAFDIQELADNLHLGPk	1	Unigene17224_All	1.07027	3	1.02598	3	71.54	3	2605.4	-1.90676	85.2306
lDDSTLIPEDQFLAQHSGPAR	1	CL235.Contig1_All	1.01336	2	0.934233	2	71.52	3	2614.33	-2.85034	69.1853
lNNAILAEEk	1	CL5874.Contig1_All	0.901657	4	1.03771	4	71.51	2	1723.01	-3.54096	53.3757
dESDVVSNLDGLTEk	1	CL1913.Contig1_All	1.09811	3	1.05495	3	71.48	2	2229.17	0.766912	63.1731
fDVFVNDEDDNALELDk	1	CL3216.Contig1_All	0.851682	3	0.697382	3	71.47	3	2606.3	-3.82471	77.9584
hVVFGQVVEGYDVVk	1	CL5555.Contig1_All	1.11424	412	0.996212	412	71.39	2	2283.29	-2.27582	64.8264
yVSGSYDAPEGFQELDk	1	CL1277.Contig5_All	1.12288	3	1.38171	3	71.39	3	2513.25	-4.85394	61.9719
dAVTYTEHAR	1	CL9500.Contig1_All	0.911313	18	0.668478	18	71.25	3	1466.75	-3.53556	32.884
vVIGMDVAASEFYGSDk	1	CL7728.Contig1_All	0.99081	106	1.03399	106	71.25	3	2396.25	-4.22393	114.08
iGVNAIPAIEEVNIFk	1	CL4175.Contig1_All	0.938563	15	1.14408	15	71.22	2	2335.38	-1.06348	84.3464
lADAVGLTLGPR	1	CL4916.Contig1_All	1.0219	10	0.97726	10	71.16	3	1486.89	-0.370313	69.3241
aALQEAYSTPILPLDLLADRPPEk	1	CL3015.Contig3_All	1.0847	4	1.05846	4	71.12	4	3229.83	-1.23945	85.8803
lTSQEMAELDSIASSVIGDR	1	CL2967.Contig2_All	0.67288	1	1.0097	1	71.1	3	2426.24	1.69839	99.7009
gEEALSLGLVDALASSDEVVNTAR	1	Unigene9294_All	1.17389	2	1.16368	2	71.08	3	2720.42	-1.52122	92.0168
nLQDIIAILGmDELSEDDk	1	CL9614.Contig1_All	0.966206	3	1.04216	3	71.05	3	2756.45	-0.876936	95.1577
yLPYTEQTTEHMVSR	1	Unigene14263_All	1.00169	2	0.955238	2	71	3	2159.07	-3.69598	58.0634
vQLLEIAQVPDEHVNEFk	1	Unigene9511_All	1.05199	24	1.09689	24	70.95	3	2716.51	-1.91961	76.438
eHVIkPVIPAQYLDENTIFHLNPSGR	1	CL6856.Contig2_All	0.789821	19	1.0883	19	70.94	5	3595.97	-2.70873	77.4257
aMQLLESGLk	1	CL4471.Contig2_All	0.960726	16	1.06696	16	70.93	2	1698	-4.13259	74.3283
sVIALHNLINNk	1	CL6443.Contig1_All	1.08434	4	0.90031	4	70.92	2	1944.19	0.201166	64.6313
sIVGATLEVIQk	1	CL3900.Contig1_All	0.984902	17	1.04427	17	70.91	2	1866.15	-2.30883	72.6329
vIFHNPGMQEDPAcGPLLDAVAIk	1	CL8328.Contig1_All	0.912719	6	0.534015	6	70.88	3	3200.71	0.0470004	75.7624
vYGLNEIQAGEMVEFSSGVk	1	Unigene115_All	1.07532	21	1.10793	21	70.83	3	2765.45	-3.39411	112.74
lFNENANFSELNQLAEEAk	1	CL77.Contig2_All	1.10742	2	0.990602	2	70.81	3	2789.45	-0.646421	82.8174
hVQNNPPDLIPEEDR	1	Unigene12341_All	1.0716	5	0.978712	5	70.78	3	2077.06	-2.83192	46.0918
sYVGEVVAEEPNk	1	Unigene18274_All	0.848272	10	0.816904	10	70.76	2	2029.1	-4.20258	53.6411
aAGEDESAAPSVAVLEk	1	CL2758.Contig2_All	1.02551	5	0.908789	5	70.74	2	2252.22	-2.88203	51.6304
iVmELYADVVPR	1	CL5555.Contig1_All	1.07698	23	1.10141	23	70.73	3	1724.95	-1.62218	85.4765
nLQLLLTAGIGSDHIDLk	1	CL8480.Contig1_All	1.56768	5	1.23773	5	70.67	3	2529.48	-1.08312	83.5405
sALNNLVVELIR	1	CL8421.Contig2_All	1.84274	80	1.11092	80	70.55	3	1644.99	-1.1636	88.6884
iTIDPDDPAAVAEYAk	1	Unigene9673_All	1.13672	9	1.19384	9	70.53	2	2297.25	-1.05341	65.4527
fTPDLVEVYNELQQVNk	1	CL2423.Contig3_All	1.0311	5	1.02129	5	70.45	3	2644.44	-1.17039	92.8838
aAVELLAGR	1	CL8328.Contig1_All	0.895997	8	0.869527	8	70.43	3	1203.73	-2.79712	54.9627
gFNIIDNIk	1	CL8974.Contig2_All	1.14285	7	1.3839	7	70.4	3	1641.97	-3.5396	66.3846
qHFDLAEPAFLQIAQYR	1	Unigene10535_All	0.806723	1	0.708545	1	70.36	3	2351.24	-2.09927	79.3084
hFVGDGGTTk	1	CL395.Contig4_All	0.935426	3	1.15469	3	70.36	3	1626.9	-4.40312	32.9142
vVALAAGSNVTLLADQVR	1	CL7844.Contig1_All	1.00901	2	1.01071	2	70.31	3	2101.22	-4.31124	77.8939
gYPGYMYTDLATIYER	1	CL7428.Contig1_All	1.09281	9	1.06884	9	70.31	3	2217.08	-1.38721	78.9309
qAFDEAIAELDSLNEESYk	1	Unigene13904_All	1.19731	2	1.33121	2	70.3	3	2780.4	-1.64126	85.3396
aAATEGDEASVVTDYILk	1	CL745.Contig1_All	0.978114	4	1.2147	4	70.29	2	2461.32	-1.52796	73.0657
yDDLYDPMYDLDVk	1	Unigene14418_All	1.28098	4	1.29652	4	70.28	2	2373.17	-2.17942	75.9143
lTPEEMAQLSALVDIVk	1	CL1611.Contig2_All	1.50279	6	1.04675	6	70.27	3	2465.41	-1.64057	98.6931
qLASLNLQEAPIIGAFNPk	1	Unigene3223_All	0.922443	3	1.14391	3	70.24	3	2632.52	-3.18694	80.6853
gITFENYAGPSk	1	CL2142.Contig4_All	1.06535	4	0.871966	4	70.23	2	1892.04	-1.03767	54.2709
eTGPSLYFIDYIASLHk	1	CL5206.Contig1_All	1.20493	8	1.14414	8	70.15	3	2562.4	-1.70097	90.4039
gGALLNTITGPGFHLk	1	Unigene11960_All	1.14911	4	1.11679	4	70.14	3	2204.3	-1.39339	73.5717
aIASNIDANFLk	1	CL4682.Contig1_All	1.04389	6	1.08517	6	70.1	2	1885.09	-4.77701	65.1038
yTDDMELDDAVHTAILTLk	1	CL7129.Contig1_All	1.06382	7	1.0758	7	70.07	3	2772.45	-2.50572	90.7269
iENAVQTVEDIAEAVEk	1	CL4023.Contig1_All	0.911069	5	0.94358	5	70.05	3	2466.35	-3.71199	109.579
lAEMPADSGYPAYLAAR	1	Unigene18805_All	1.00046	11	0.939252	11	69.98	3	2100.07	-2.45403	67.8106
eFDNESPYTIMFGPDk	1	Unigene3051_All	1.25278	4	1.33989	4	69.98	2	2498.23	-2.01347	74.954
aHTDWITAIATPIDNSDmIVTSSR	1	CL1892.Contig1_All	1.00528	4	1.21012	4	69.95	3	2935.47	-2.03635	75.4023
fTSAYQEIVDAYGVAk	1	Unigene19019_All	0.877577	5	0.911539	5	69.93	3	2370.27	-2.87803	84.7659
iDELLEEEGIIEGLEk	1	CL759.Contig4_All	1.12831	2	0.981903	2	69.93	3	2437.34	-4.03729	92.7425
iVADEGVLALWk	1	Unigene635_All	0.991349	11	0.908146	11	69.87	2	1922.15	-3.87873	82.8894
aNFLSGDDFEPPLIPSk	1	Unigene3051_All	1.11076	5	1.44245	5	69.85	2	2455.33	0.133689	75.9774
aEQGHAANNGLDIALR	1	CL1920.Contig1_All	1.01684	9	1.16858	9	69.81	3	1954.04	-2.49097	47.6799
eLATEYQIQGFPTIk	1	Unigene3673_All	0.999591	8	1.27322	8	69.81	2	2346.31	-1.91875	70.0479
eQEAINFLEk	1	Unigene11788_All	1.2128	8	1.02381	8	69.79	2	1829.02	-2.79461	68.8619
tLAGSSSGIDLGk	1	CL5986.Contig1_All	2.11314	3	3.92043	3	69.76	2	1814.04	-2.40601	48.8653
eLDYLVGAVSNPk	1	CL3885.Contig3_All	1.02884	22	1.11693	22	69.74	2	2013.15	0.631886	74.6664
aVSNVNTIIGPALIGk	1	Unigene20612_All	1.0248	10	1.09449	10	69.68	2	2175.33	0.74312	71.3178
iYDGEGFNYIk	1	CL3344.Contig1_All	0.916335	4	1.29814	4	69.63	2	1927.03	-3.73195	63.5431
aHTDWITAIATPIDNSDMIVTSSR	1	CL1892.Contig1_All	1.04427	11	1.0328	11	69.61	3	2919.48	-0.632416	80.1525
aFFEPLLVSEYVAk	1	Unigene16969_All	1.21547	4	1.22817	4	69.59	3	2221.27	-3.29235	87.3821
iAPTILLDVPR	1	Unigene20627_All	1.13984	4	1.13515	4	69.55	3	1511.95	1.03728	72.1872
aNAVALGDYLMSk	1	Unigene9783_All	0.994692	7	0.990084	7	69.51	2	1961.09	-2.475	76.3183
eYGLIDGVILNPLk	1	CL4435.Contig5_All	0.988106	4	0.963557	4	69.49	2	2152.28	-2.64256	80.0121
fLQYNSPHPAVDSHTEILAAPLTR	1	CL9325.Contig2_All	1.29105	4	1.12737	4	69.44	4	2981.57	-1.46559	65.9371
eLSVVGGSGLFR	1	Unigene9945_All	0.866977	12	0.844309	12	69.43	3	1524.86	-2.69047	64.707
sVLLGFLGGSDGLFAQk	1	Unigene9780_All	0.914365	8	0.993995	8	69.43	3	2317.33	-2.17775	92.2089
aGITVIQIDEAALR	1	CL9612.Contig2_All	0.832972	116	0.840303	116	69.35	3	1774.04	-1.25519	112.81
nAILSGcSAGGLASILHcDR	1	Unigene2836_All	1.07324	2	1.01536	2	69.35	3	2376.21	-0.0476449	71.1426
dRPDLAAPESLQLYLDTR	1	CL7643.Contig3_All	1.06788	2	1.3037	2	69.35	3	2377.24	-11.3426	71.8443
lVASLPEGGVLLLENVR	1	CL2817.Contig2_All	1.05403	7	1.10391	7	69.29	3	2083.24	-1.85935	90.1217
aGLVSLYQDASmLTFEGQk	1	Unigene5274_All	0.979007	4	1.05795	4	69.27	3	2682.43	0.215509	85.995
eDDIVGILDTDDIkDMQPLNDR	1	CL8944.Contig1_All	0.7854	4	1.19195	4	69.25	3	3138.6	-1.39557	80.3143
lTPEEmAQLSALVDIVk	1	CL1611.Contig2_All	1.25001	4	1.14802	4	69.23	3	2481.41	-1.22876	92.8706
aLLEVVESGGk	1	CL1991.Contig2_All	1.07232	12	1.04813	12	69.22	2	1710.02	-5.06653	69.8061
iDYDEEIGAVLk	1	Unigene2767_All	1.28388	6	1.20539	6	69.21	2	1973.1	-2.48542	68.4099
ekPSIGTVVAVGPGSLDEEGNR	1	CL8944.Contig1_All	1.00224	6	1.0299	6	69.16	3	2819.53	-1.76316	59.5089
qmGLSDQDIVALSGAHTLGR	1	CL1920.Contig1_All	1.0041	4	1.03725	4	69.11	3	2389.24	-0.719958	63.1076
qVIQAIDEEk	1	Unigene14342_All	1.05094	7	0.914319	7	69.1	3	1781.02	-3.04882	57.9086
vIGPLVELLSHR	1	CL5143.Contig1_All	1.01378	5	0.998917	5	69.09	3	1637	-0.931603	94.103
eEADTEVLDILELYR	1	CL3195.Contig2_All	1.03047	4	1.23998	4	69.08	2	2112.1	-1.07599	93.4531
eSITSFQGVLDGk	1	CL9614.Contig1_All	1.0728	11	1.17473	11	69.05	2	1989.1	-4.02303	65.7421
yAAYLAAFGPEESYLk	1	Unigene14296_All	1.25117	6	1.10477	6	69.05	2	2401.29	-0.981159	84.078
dLVLGHGALGPLLAQLNEHAk	1	CL6870.Contig5_All	0.665803	7	0.796624	7	69	3	2774.61	-1.44739	82.1963
sQEEAMSDYITk	1	CL6086.Contig1_All	1.04199	4	1.16449	4	68.97	2	2010.02	-3.07629	52.7823
qLAPILDEVAISFk	1	Unigene3673_All	1.19639	10	1.58832	10	68.96	2	2152.28	-3.55468	93.6093
sLFGQIAV	1	CL8316.Contig2_All	1.13222	3	0.974533	3	68.93	2	1138.67	-2.32822	70.1866
fEAVIHFAGLk	1	CL1528.Contig1_All	1.03028	31	1.21951	31	68.93	2	1840.09	-2.04972	84.0052
eIVALSGAHTLGR	1	CL832.Contig1_All	0.894594	7	0.725869	7	68.9	3	1627.94	-2.07363	55.2532
fNPLWNSLVLGGIk	1	CL4952.Contig2_All	1.10368	4	1.01209	4	68.81	2	2166.28	-4.27011	89.6685
yGcNVPLLLMNSFNTHEDTLk	1	Unigene9511_All	1.25482	2	0.848039	2	68.81	4	3074.59	-1.1972	84.9686
fQSIDTDTFLDFLk	1	Unigene11974_All	1.02431	6	1.06329	6	68.76	3	2298.24	-2.59584	94.015
vHTVLISTQHDETVTNDEIAR	1	CL6856.Contig4_All	0.893305	6	0.786524	6	68.71	3	2682.4	1.62608	51.2485
sLLALQGPLAAPVLQHLMk	1	Unigene8230_All	1.05765	6	0.794696	6	68.69	4	2608.58	-0.0731091	87.9178
aEIVELITHLESINPNPAPTk	1	CL9611.Contig4_All	0.769009	19	0.826878	19	68.68	3	2894.64	-1.79288	97.8286
aPLESYADIGGLDAQIQEIk	1	CL1714.Contig1_All	1.18874	2	1.1141	2	68.66	4	2739.5	-0.526359	79.0828
aGIALSENFVk	1	CL1347.Contig1_All	1.00017	38	0.992243	38	68.61	3	1757.04	-2.08374	60.1983
lFNAVAAEDLIVk	1	Unigene18835_All	0.859386	18	0.933824	18	68.56	2	2011.2	-4.16795	81.3234
qLLTDLEEVEEVNk	1	CL6154.Contig1_All	0.979571	1	1.23697	1	68.54	3	2267.25	-3.71188	84.9385
iTVTQLAAAGNSGNSHSADVALR	1	Unigene14358_All	0.922084	1	0.994487	1	68.54	3	2557.36	-1.68658	57.9669
aLGAALASGLADFHQDVR	1	Unigene2722_All	1.01789	7	0.880023	7	68.52	3	2116.14	-1.91944	84.7668
lSGEELVAAGLATHFVPSEk	1	CL8967.Contig2_All	1.20554	1	1.56836	1	68.48	4	2663.48	-1.48552	82.5467
lATLLNAISSR	1	Unigene15253_All	1.16449	11	0.812421	11	68.41	3	1462.89	-1.11372	91.0579
dLPLSTLIELLk	1	CL6194.Contig2_All	1.04168	15	0.856579	15	68.29	2	1963.23	-2.33896	102.549
fMGLIVPGLPPHMLQDYNNSTR	1	Unigene18274_All	0.991189	11	0.926279	11	68.28	3	2804.45	-0.712574	87.5778
iDNFNENIGALSVk	1	CL1611.Contig2_All	0.969573	2	1.1166	2	68.24	2	2142.2	-2.88545	66.0566
dNITSFEEHDFQILR	1	Unigene353_All	1.04503	7	0.936304	7	68.19	3	2168.09	-2.57926	70.3061
ySTVTYADLFQLASATAIEEAGGPk	1	CL832.Contig1_All	0.860494	2	1.07993	2	68.19	3	3211.69	-2.93408	98.6002
fATNVPGVYAIGDVIPGPMLAHk	1	Unigene18627_All	1.19411	13	1.3227	13	68.1	3	2975.66	-1.04603	82.1454
sFILDADNLIPk	1	Unigene251_All	1.53422	15	4.26572	15	68.09	2	1954.14	-4.91501	76.3455
hILQQLQNMNIVEMDTR	1	Unigene14425_All	0.957345	7	0.920476	7	68.05	3	2387.24	-2.06485	76.7569
yPEFSTFSHYLTETQLAPEINR	1	CL3747.Contig3_All	1.2771	6	0.703286	6	68.05	3	2947.47	-1.36359	84.6842
aVLHPTAPLFDQEQQVLkPR	1	Unigene7140_All	0.952553	1	0.787898	1	68.04	4	2895.66	-3.50819	62.0256
aEGNLPVFGFHDPESFVQSIQkPR	1	CL6554.Contig1_All	0.919789	7	1.42648	7	67.92	3	3307.76	-3.23049	78.9709
gLGTQVIEEEE	1	Unigene21011_All	1.11907	2	0.990844	2	67.91	2	1507.78	-0.982685	52.8956
iVVTGGAGFVGSHLVDR	1	CL1165.Contig2_All	0.945242	3	1.0537	3	67.9	3	1988.11	-6.2881	63.6409
dLFLTVSNILk	1	Unigene18952_All	0.955217	3	1.06165	3	67.88	2	1871.14	-3.30229	88.2585
sFGAAVIYNNEk	1	CL150.Contig5_All	1.02209	9	0.959012	9	67.87	2	1921.06	-3.46826	53.6906
aLVAGQMHVFR	1	Unigene13722_All	1.02248	8	0.868094	8	67.84	3	1532.87	0.512686	56.195
sVDEQGVEDAFELLYEINER	1	CL3311.Contig2_All	0.513232	1	0.875284	1	67.83	3	2659.31	0.792023	102.403
eEQVPLIIIQTNDGGk	1	CL689.Contig1_All	1.0292	3	1.21144	3	67.81	2	2362.33	-3.95416	65.6058
lGVQLQTIATDFQk	1	Unigene21413_All	1.05491	4	0.968303	4	67.8	2	2170.26	-2.64759	81.381
sVNDTEGILSDPSHk	1	Unigene18974_All	1.00778	2	1.14458	2	67.79	3	2207.17	-2.02572	48.1828
lAQGEGPTEIPLAIMTSDDTHSR	1	Unigene14725_All	1.09924	7	0.903641	7	67.79	3	2743.38	-1.18862	72.7355
dVVNFTSADYLGLLGHDk	1	CL2415.Contig1_All	0.885751	1	1.07736	1	67.76	3	2572.38	-3.11929	78.4508
vAILGAAGGIGQPLSLLmk	1	CL1695.Contig2_All	1.1311	6	1.19302	6	67.75	3	2433.47	-1.06208	85.1561
aPGGAPANVAIAVAR	1	CL673.Contig2_All	1.08144	3	1.31097	3	67.71	3	1638.96	-2.40632	47.7461
qAVDISPLR	1	CL7769.Contig1_All	0.977207	7	1.09594	7	67.67	3	1302.77	-2.42594	44.9569
sSVLIISTDPAHNLSDAFQQR	1	CL7940.Contig1_All	1.2216	3	0.93653	3	67.66	3	2603.37	-2.16046	72.0672
lTDAVDIGPDGTLYFTDASHk	1	CL145.Contig1_All	1.28769	2	1.33336	2	67.63	3	2844.46	-9.09353	73.3287
qMVQEGALTALASVADSSQEHFQk	1	Unigene1079_All	1.30527	2	0.845853	2	67.61	4	3183.65	-3.34702	83.1924
vHTAAAPVVADLGEMYR	1	CL1784.Contig13_All	0.893323	5	0.956586	5	67.57	3	2104.12	-0.244025	65.6446
aASILSSHEPPIVLAk	1	Unigene3673_All	1.82741	5	1.41374	5	67.56	2	2241.34	-1.81171	67.3667
eLPEQIDTSTYMPS	1	Unigene18266_All	1.06517	3	1.0768	3	67.54	2	1914.93	-1.4116	62.8479
kPTEGPQQMIQVVLNNATVETDNPDLR	1	Unigene16722_All	0.620164	2	0.56134	2	67.52	4	3615.92	-2.09946	85.9443
gDIELNDEEIk	1	Unigene10113_All	1.07368	8	1.43834	8	67.47	2	1883.02	-2.17391	50.7394
tYIPHMVELLADSVR	1	CL234.Contig1_All	1.46684	6	1.03531	6	67.46	3	2048.11	-1.45182	90.9209
nDGPHPLADDDEDDDLFEDR	1	CL129.Contig8_All	0.699352	1	0.821451	1	67.41	3	2604.12	-3.81756	56.555
lFITNDAATIVNELEVQHPAAk	1	Unigene11996_All	0.937399	9	1.04489	9	67.41	3	3002.67	-1.5932	89.8474
dFAIVAADTSAVHSILVHk	1	CL5206.Contig1_All	1.04715	11	1.02812	11	67.38	3	2602.48	-1.78391	83.017
aASILSTIDPSVVLAk	1	CL689.Contig1_All	1.13219	6	1.20801	6	67.35	2	2193.33	-1.85158	83.5527
hTPGTFTNQLQTSFSEPR	1	CL3621.Contig1_All	0.993359	18	0.83062	18	67.34	3	2352.18	-1.96719	57.0319
iLTDYGFEGHPLR	1	Unigene19473_All	1.16477	12	1.03499	12	67.31	3	1821.98	-1.70002	65.0933
vALPLEEAADGFVTAAELEk	1	Unigene3719_All	0.939602	2	1.03656	2	67.29	3	2681.49	1.68537	100.055
nLANPTALLLSAVTmLR	1	CL1699.Contig3_All	1.19671	12	1.07322	12	67.28	3	2118.22	-1.53758	99.3632
sYELPDGQVITIGAER	1	CL937.Contig17_All	1.09592	13	0.989735	13	67.25	2	2052.09	-0.328148	70.0359
vTLDGSPESPLELIQVQIANVESk	1	Unigene19037_All	1.11324	2	1.3726	2	67.22	3	3174.78	1.05846	97.566
dATNDFEDVGHSDSAR	1	Unigene12009_All	0.867925	6	1.05064	6	67.18	3	2039.91	-3.31124	41.1959
eLDYLVGAVANPk	1	CL3885.Contig1_All	1.01312	16	1.16433	16	67.17	3	1997.15	-3.87434	75.4981
fSTMTADEYFAk	1	CL5347.Contig1_All	1.22565	4	1.1532	4	67.16	2	2019.02	-8.9706	65.7301
lAYVALDYEQELETSk	1	CL937.Contig12_All	1.06606	4	1.10187	4	67.16	3	2480.33	-2.22858	88.8834
eMVIVHPDADFLDDIAGk	1	Unigene16617_All	1.00423	2	1.24939	2	67.16	3	2593.37	-4.0892	78.0219
hNAQIFWDSQISQVAGR	1	CL7696.Contig1_All	1.00917	3	0.941865	3	67.14	3	2261.17	-1.23041	66.0225
iVScADILTLAAR	1	Unigene349_All	1.12418	8	0.745151	8	67.13	3	1706.97	-1.85934	74.8002
dMLDNIQQSLFDVAk	1	CL3195.Contig2_All	1.01329	3	1.17735	3	67.07	3	2345.26	-2.27039	85.8195
gAETALTAIEMASLFER	1	Unigene10098_All	1.06636	4	0.953063	4	67.06	2	2114.11	-2.516	94.3144
iIETEEESRPSASEVANATQR	1	CL9222.Contig1_All	2.37536	57	1.12973	57	66.95	2	2621.33	0.181522	54.0588
hAGDLGNITVGEDGk	1	CL9067.Contig2_All	1.12453	9	1.23802	9	66.93	2	2091.13	-1.59306	45.1723
yIAPEQVPVQYGGLSk	1	CL759.Contig4_All	1.04811	8	0.885626	8	66.93	2	2357.33	-1.74968	59.7916
sVETTLAELGVTLSNAAYR	1	CL3633.Contig1_All	1.13503	3	1.04336	3	66.92	3	2299.25	0.864176	97.6246
iEVDQETVDLLESLGmk	1	CL3004.Contig1_All	0.887942	2	1.31899	2	66.89	3	2543.37	-1.27897	91.7606
lAYIALDYEQEmETAk	1	CL937.Contig13_All	0.979828	5	1.0377	5	66.88	3	2512.29	-6.07863	80.6868
dTVLELEFQGVk	1	Unigene18805_All	0.883682	6	0.893415	6	66.87	3	1986.13	-3.71709	70.0329
qLEEDEIDAIVAEIEAEk	1	CL1991.Contig2_All	0.888322	6	1.15696	6	66.87	3	2652.4	-2.8011	98.8942
iLVVGVFPEFSGEk	1	CL689.Contig1_All	1.15686	14	1.15913	14	66.85	2	2129.25	-0.267677	83.5092
aALETEELGVSILEDLHQQR	1	Unigene16899_All	1.06372	2	0.894922	2	66.83	3	2555.36	-1.67967	98.0617
qLNMLEEGLVNHPVVGFGESGR	1	Unigene111_All	0.881587	2	0.834889	2	66.83	3	2686.39	-0.359821	78.2242
dFQLYESGIFTGk	1	CL1951.Contig2_All	1.02722	19	1.04574	19	66.82	2	2113.13	-3.69029	72.3061
lLQGVTIAHGGVLPNINPVLLPk	1	Unigene18975_All	1.0244	13	0.795228	14	66.81	3	2971.82	-1.74308	84.326
aSPDTIANYTLTMLR	1	CL3036.Contig3_All	0.892195	7	1.01908	7	66.72	2	1971.05	0.858108	80.8096
tTGTSFPAQGLLGLGR	1	CL2303.Contig4_All	1.09339	11	0.981865	11	66.71	3	1880.05	-0.949909	68.8056
eGGGGGGGYGR	1	Unigene17955_All	0.711	2	0.749831	2	66.67	3	1227.6	-1.39859	22.0341
iVVAGAGSAGIGVLNAAR	1	Unigene2765_All	1.17453	4	1.16025	4	66.67	3	1900.13	-0.269245	65.5074
aADVIAAANAAAEVALR	1	CL4189.Contig2_All	1.05507	8	0.951211	8	66.67	3	1901.08	0.470283	92.4288
vLVDIVSAAANATPGLGR	1	CL3835.Contig1_All	0.938832	5	1.07698	5	66.65	3	2028.18	1.44447	93.6881
nVEILEGDGGVGTIk	1	CL4943.Contig4_All	0.943046	2	1.48673	2	66.6	2	2109.21	4.28188	58.878
vITAGVLSAISDIAAQk	1	Unigene16561_All	0.922521	8	1.00446	8	66.59	3	2265.36	-2.61636	98.5106
aAGEDETVPER	1	Unigene22971_All	0.728541	7	0.610789	7	66.57	2	1477.74	-2.36266	30.2183
aALPGLTDELLHEMmQPPLR	1	Unigene14263_All	1.05658	8	1.02486	8	66.46	3	2552.35	-0.990034	89.1229
aNPANPSIDLGPEFk	1	Unigene9511_All	1.03977	12	1.03894	12	66.44	2	2178.19	-4.52362	58.4844
dVLDGSSIGFVETLENDcAk	1	CL3344.Contig1_All	1.07754	1	1.04069	1	66.43	3	2777.4	-2.72015	80.8465
aENEALAEHDAR	1	Unigene9725_All	1.07758	5	2.35378	5	66.42	3	1629.81	-2.44133	32.0453
eVILFLSHGk	1	CL6254.Contig1_All	0.803323	3	0.665027	3	66.42	2	1751.06	-4.34433	73.2175
lFLLTQNDVDDIEk	1	Unigene16874_All	1.01437	6	1.31579	6	66.41	3	2271.26	-2.96969	81.8809
dRPDLSAPESLQLYLDTR	1	CL7643.Contig2_All	0.856002	1	1.07489	1	66.39	3	2393.25	-4.34537	71.5392
sAIGIGTLLmDGLGDTIR	1	CL8614.Contig1_All	0.796138	2	0.786526	2	66.37	3	2123.16	-3.85975	86.2275
yNSPHPILDSHTDILSAPLTR	1	CL5669.Contig2_All	1.00779	2	1.01535	2	66.28	3	2651.4	-2.30286	60.5126
vDVQNILETLGAGHGGR	1	CL5489.Contig2_All	0.916246	4	0.917557	4	66.26	3	2040.11	-3.75662	79.9328
hVQLTVPLEDLIDR	1	Unigene18858_All	1.08384	4	1.02219	4	66.25	3	1952.11	-0.453475	74.6783
qEAYDEDEDMHDGAQR	1	CL3143.Contig1_All	1.31434	2	0.866892	2	66.2	3	2212.93	-1.87611	36.9029
dIELAITELQk	1	CL194.Contig1_All	1.02108	16	1.10877	16	66.18	2	1881.11	-1.13471	77.9057
gQPVLNTGSPITVPVGR	1	CL9614.Contig1_All	1.06747	9	1.08849	9	66.18	3	1996.14	-4.13543	54.3624
iVMELYADVVPR	1	CL5555.Contig1_All	0.974715	33	0.940295	33	66.15	3	1708.96	-1.14852	93.2501
nLAGEISQEYAk	1	CL8636.Contig1_All	1.04225	6	1.06126	6	66.13	2	1931.07	-0.47241	56.6805
aTPENVVHLAVEQSDLHSIR	1	Unigene7352_All	0.955134	1	1.03076	1	66.12	4	2519.35	-0.416157	67.7637
lYISNLDYGVSGEDIk	1	Unigene20942_All	0.977265	4	1.07947	4	66.11	2	2394.3	-1.62487	68.5913
fSGEEFENFIALAEk	1	Unigene3673_All	1.05846	14	1.26397	14	66.03	2	2339.23	-2.26044	91.3718
sYDPLELIQLNFPHEk	1	Unigene19482_All	1.06711	9	1.05041	9	65.98	4	2551.4	-2.4633	86.0871
iSSINLAVDFIASHPQAk	1	CL239.Contig1_All	1.07277	6	0.925198	6	65.94	3	2519.45	1.23817	86.3601
eVVSEIESAISDLR	1	CL5012.Contig3_All	0.993538	7	1.25849	7	65.91	3	1851	-1.62406	100.614
vVGQDQAVTAVAEAVLR	1	Unigene2756_All	1.38129	4	1.12787	4	65.89	3	2030.15	-1.83983	82.6933
vDTTISAALDFTDIPHTQIR	1	CL2254.Contig6_All	1.03676	3	1.00853	3	65.88	3	2518.34	-3.82422	82.9339
yEAVIDAYLDGLEASGLSDLSR	1	Unigene13923_All	0.525782	1	0.861655	1	65.86	3	2661.34	-4.90675	109.255
qLDHGVLLVGYGAAGYAPIR	1	CL2028.Contig11_All	1.03747	4	0.901421	4	65.85	3	2374.32	0.687459	69.2728
nQIIEEAEEYk	1	CL1571.Contig2_All	1.08457	5	1.09495	5	65.84	3	1974.06	-4.43267	68.1589
iEVDQETVDLLESLGMk	1	CL3004.Contig1_All	1.0699	8	1.15179	8	65.84	4	2527.37	-1.95197	96.9428
lISDATAAAGMGLIELR	1	CL8569.Contig1_All	1.064	12	1.14833	12	65.83	3	2006.12	-3.57148	89.9234
sFAAVGVDPAIMGVGPAVAIPAAVk	1	Unigene16507_All	1.02002	4	1.46098	4	65.82	4	2916.68	-1.09039	79.966
iDTEVLTEDVHPLLR	1	Unigene18563_All	0.927695	4	0.804814	4	65.78	3	2054.14	-1.68998	70.5506
tVTAMDVVYALk	1	CL9500.Contig1_All	0.957682	49	0.774915	49	65.74	2	1919.11	-3.70204	80.5117
sAIGIGTLLMDGLGDTIR	1	CL8614.Contig1_All	0.6958	3	0.807212	3	65.71	3	2107.17	-2.44982	96.4407
aVGLPTDDDmGNSEVGHNALGAGR	1	CL3344.Contig1_All	1.3313	2	1.22107	2	65.68	4	2673.28	-0.565904	48.7099
lLAGSEELTELLk	1	Unigene7861_All	0.839336	3	0.888918	3	65.67	3	2024.2	-2.67677	90.2278
lQSILmPLSEFEHAEk	1	CL1953.Contig2_All	0.980961	4	1.09915	4	65.62	3	2496.35	-4.84031	88.8081
qNLAATFVNAFVNAGFGQDk	1	CL8636.Contig1_All	1.13812	3	1.23394	3	65.62	3	2720.46	-0.896405	101.248
tSEmSAVGLLAAALQGIDIk	1	Unigene9906_All	0.961853	3	1.14392	3	65.61	3	2612.47	-2.51105	99.8671
dFTQFETFDQALDEFYSk	1	Unigene13791_All	0.834667	1	1.0858	1	65.6	3	2839.39	-1.42373	94.7681
wVEEGNEVTQTEATLTmLHLR	1	Unigene3662_All	0.744921	2	0.87837	2	65.59	3	2777.4	-4.57059	82.7589
dPFTHVLLLDEVMQEGDPTLTDR	1	CL4834.Contig1_All	0.95751	1	1.12872	1	65.56	3	2945.49	0.500813	89.607
eEQDQAAVISHQR	1	Unigene17218_All	0.768314	1	0.648341	1	65.54	3	1814.92	-8.19274	34.5241
aDELLVLENITVDTTk	1	CL3216.Contig1_All	1.00922	7	0.981491	7	65.53	3	2382.36	0.315216	86.0608
vIDMPSSYVELHPDIR	1	CL8776.Contig1_All	1.0043	3	0.990638	3	65.52	3	2175.14	-3.1783	67.1373
lPDATLSYFDSSDELQTVSVSDLTSNk	1	Unigene7516_All	0.977568	1	0.731458	1	65.52	3	3540.8	-0.86704	84.1203
mVVAAAGAVk	1	CL9325.Contig2_All	0.97919	3	1.00719	3	65.49	3	1540.93	-3.59087	42.5389
aPLIADDVYEIIMk	1	Unigene2633_All	0.935956	3	0.774562	3	65.46	3	2199.25	-2.48544	99.6307
aAADAGLTVAEVTGSNVVSVAEDELmR	1	CL8480.Contig1_All	1.35486	2	1.3073	2	65.46	3	2995.53	4.42185	95.9036
gVITEIIHDPGR	1	CL851.Contig2_All	1.00417	16	1.03577	16	65.33	3	1610.92	-0.655961	58.8012
iSPAIDHLDAmDSDPLSLGSAVIER	1	CL7615.Contig1_All	0.994576	1	1.15018	1	65.3	3	2942.5	-3.80996	75.2938
dTDDVINSVVAGLGTGALYk	1	Unigene12066_All	0.793761	1	0.920391	1	65.29	3	2616.42	-4.5585	86.9348
eDDLNEIVQLVGk	1	Unigene18805_All	1.08544	16	1.04097	16	65.26	2	2080.17	-3.6639	84.2873
gPHVDEPELVSALVEGR	1	CL3894.Contig1_All	0.9938	2	0.880694	2	65.24	3	2108.12	-2.29191	71.6759
lFEAIDDNHDGYLSHAELR	1	Unigene7561_All	1.08718	3	0.842898	3	65.24	4	2519.24	-0.837401	72.3797
gVLLQLPITLLHR	1	CL8190.Contig2_All	0.595579	5	0.472835	5	65.2	3	1777.13	-1.47767	85.4064
eGAVDPTFLYFAHGLk	1	Unigene21414_All	0.895729	8	1.01121	8	65.2	3	2373.3	-3.40849	78.4117
eDIAVVLISQYVANmIR	1	CL315.Contig1_All	1.01192	2	1.28352	2	65.19	3	2254.24	-2.25165	107.969
vPVLETPDGPVFESNAIAR	1	CL7335.Contig3_All	1.14162	3	1.17352	3	65.15	3	2315.26	1.01329	69.3638
iADAVELDSFASQLSQYk	1	CL5543.Contig1_All	1.09694	1	1.11116	1	65.09	3	2593.39	-2.44936	90.8783
iLHPGDVFVFPR	1	Unigene15203_All	1.15052	3	0.867294	3	65.08	3	1700.98	-1.5631	71.8578
tFFDNVSQAIVk	1	Unigene229_All	1.20433	9	1.25213	9	65.07	2	1977.12	-0.955889	70.7269
eVYAETYGEDLLk	1	CL7235.Contig1_All	0.958292	9	0.97346	9	65.07	3	2138.14	-4.60154	69.2048
qFAVAPDFDENDVEHWLLPR	1	Unigene5884_All	0.991651	2	1.04964	2	65.06	3	2702.35	-0.0424251	85.0484
dDLFNINAGIVk	1	CL600.Contig2_All	0.957685	1	1.12641	1	65.02	2	1927.11	-3.06326	67.7584
sTVHDVVLVGGSTR	1	CL9562.Contig6_All	1.02721	19	0.810285	19	64.96	2	1730.97	-2.90805	45.2942
iSPAIDHLDAMDSDPLSLGSAVIER	1	CL7615.Contig1_All	0.961684	3	0.969073	3	64.96	3	2926.51	0.459031	80.6091
yIIGGIPVSATVk	1	CL6066.Contig1_All	0.967759	22	0.794864	22	64.93	3	1926.18	-3.63967	64.4927
lVVNDPDSVLDSLTR	1	Unigene5208_All	1.02588	5	1.13571	5	64.93	3	1947.07	-2.34015	75.0191
lAYIALDYEQELETAk	1	CL937.Contig11_All	0.927775	39	0.991274	39	64.92	3	2478.35	-2.86585	94.1779
eQLNSVAHFLESR	1	CL3311.Contig3_All	0.991231	4	0.995095	4	64.9	2	1833.97	-3.44997	72.7905
aALPGLTDELLHEMMQPPLR	1	Unigene14263_All	0.873952	6	0.960779	6	64.87	3	2536.36	-0.739095	95.8576
qALQILQDNYPEFVTk	1	CL2675.Contig3_All	1.05982	8	1.03367	8	64.85	3	2515.4	0.855308	79.5107
vDIAQAVFLHSLSR	1	Unigene21000_All	0.752558	7	0.751685	7	64.8	3	1860.06	-0.942445	83.3705
qSTADMTAFVQNLLQQMQTR	1	Unigene18738_All	0.890642	2	0.731084	2	64.8	3	2615.32	-1.7153	103.074
iSGYADAAQAPELFTTAPALAIPk	1	CL3403.Contig1_All	1.04658	3	2.11	3	64.8	3	3024.69	-0.145101	79.8194
vVDALGVPIDGR	1	Unigene115_All	1.08087	17	1.04794	17	64.79	3	1514.88	-3.63785	61.698
dIYEHAVLLSVk	1	CL1940.Contig1_All	1.17897	5	1.17572	5	64.78	2	1995.17	0.549749	64.9094
gGGANVVAHGYTk	1	Unigene5560_All	1.34412	6	0.777064	6	64.77	2	1839.02	-6.41609	36.4483
vSEIVALWR	1	CL3311.Contig3_All	0.826091	3	1.0249	3	64.75	3	1376.81	-4.80562	85.9312
aAGLPAVcGVNIPYk	1	CL5986.Contig1_All	1.59948	9	1.77461	9	64.72	3	2138.21	-5.65256	64.1385
sIPEGAVVcNVEHHVGDR	1	CL851.Contig2_All	0.787454	6	0.789413	6	64.69	4	2279.15	-0.835849	57.7225
dNGMHALIIYDDLSk	1	Unigene115_All	0.871146	5	1.25709	5	64.67	2	2313.23	-2.03869	69.1592
vQPPVDSLEQLATEGLAFASk	1	CL2567.Contig2_All	0.981469	13	1.07053	13	64.66	4	2808.56	-0.947581	100.826
eVTDDEGWLHTGDIGLWLPGGR	1	CL3123.Contig1_All	0.88875	2	1.0201	2	64.62	3	2727.36	-1.57574	83.8533
vYALDAVFDSPEDVPEDIk	1	CL1371.Contig2_All	1.30188	3	1.03498	3	64.58	3	2730.43	-0.303967	86.1681
vLSNDYDLLNPPAELEk	1	CL1487.Contig2_All	0.97978	16	1.06415	16	64.55	2	2538.39	-2.03569	73.7792
lmTLLSAAQTNQEScLDGFSHDGADk	1	Unigene13722_All	1.3824	4	1.13006	4	64.54	4	3433.67	-3.12396	78.2629
lGVLNSEEFDQLVVPEk	1	CL1746.Contig1_All	0.988084	3	1.33898	3	64.51	3	2524.41	-2.19659	81.6994
qISELGIYPAVDPLDSTSR	1	CL9614.Contig1_All	1.0587	17	1.03266	17	64.48	3	2365.25	-1.61602	72.9585
aIVADFITSLAASPPSSR	1	CL7859.Contig2_All	1.11945	4	0.957797	4	64.47	2	2107.17	0.266042	95.0042
wVEEGNEVTQTEATLTMLHLR	1	Unigene3662_All	0.79236	1	0.960654	1	64.43	3	2761.39	-6.68167	86.4465
iSTVNSYTLLETSIYR	1	CL5994.Contig1_All	1.41039	4	1.03086	4	64.41	3	2164.18	1.33046	76.7355
vHAAIANAVAVVGESDR	1	Unigene2606_All	0.964278	1	1.41042	1	64.38	3	1983.09	-3.56915	72.5473
fGAVVVSLEHR	1	Unigene5411_All	1.3181	2	0.997265	2	64.37	3	1517.87	-1.16027	71.062
gIVEHSAAAQQQFDASHSPLAIALR	1	CL5941.Contig4_All	0.901774	2	0.888907	2	64.35	3	2921.56	0.487935	66.2418
lYIEQYEQDPSk	1	Unigene7770_All	1.02443	4	1.13676	4	64.33	3	2121.13	-3.22368	57.6365
lLSAIVTPNQR	1	CL9222.Contig1_All	1.9464	65	1.08185	65	64.3	3	1515.91	-2.60456	66.7273
dYEEVGAESAEGEDDENDEY	1	Unigene9258_All	0.885596	2	0.704933	2	64.3	2	2569.01	-3.70484	51.7032
vSILAALLEPGVk	1	CL6456.Contig3_All	1.04309	10	0.855063	10	64.26	2	1918.21	-3.30245	96.2379
qQEEEMALLLADPFDVEAQk	1	Unigene5613_All	1.05659	2	1.33481	2	64.24	3	2912.51	-2.30698	89.0808
gFFEVTHDISQLTcADFLR	1	CL4965.Contig4_All	1.16359	5	0.736859	5	64.23	3	2560.28	-0.873614	94.4205
lFGDINFVGVSAGYPTTVTR	1	CL1950.Contig3_All	1.41757	3	1.16196	3	64.22	2	2418.31	6.77863	83.2746
lSAAISNILETk	1	Unigene5254_All	1.05544	17	0.930553	17	64.2	3	1868.13	-2.05861	87.7223
fGFSQTEVEDAFETSAR	1	CL2862.Contig2_All	1.15793	3	1.29911	3	64.2	3	2225.06	-1.38093	77.5489
tLVAAMEAADVk	1	Unigene14621_All	1.07288	8	1.10205	8	64.19	2	1827.05	-2.77578	68.9703
vESFVQDAISk	1	CL1216.Contig2_All	1.27555	7	1.12327	7	64.19	2	1831.04	-2.87185	76.4807
dYADILEHLVGR	1	CL6648.Contig1_All	0.861053	12	0.781654	12	64.13	3	1704.92	-1.60859	83.2353
vIDLFSSPDVVk	1	CL3925.Contig1_All	0.986969	40	1.10966	40	64.13	2	1927.13	-1.73484	76.9512
vFFDMTVGGQPLGR	1	CL5555.Contig1_All	1.13973	12	0.989708	12	64.1	3	1827.97	-0.58226	75.825
lLFNDFLSSASSIDEAAk	1	CL3679.Contig1_All	0.951195	5	1.93597	5	64.07	3	2536.36	-4.22653	89.7252
nIIHFYNLANQAVER	1	Unigene18805_All	0.969473	12	0.925942	12	64.06	3	2106.14	-1.88683	72.52
vDTTTSAGLDYSDIPHSQIR	1	CL2254.Contig2_All	0.992004	1	0.811917	1	64.06	3	2480.25	-2.9478	56.3262
iPTLAIHLDR	1	Unigene14935_All	0.849844	5	0.841927	5	64.05	3	1452.88	-1.15146	62.3175
yQIGPEQIEALYQYAk	1	CL6716.Contig2_All	0.880197	3	0.891413	3	64.02	3	2522.36	-4.39012	83.9107
dAEGQDVLLFIDNIFR	1	CL9614.Contig1_All	1.14894	4	0.987801	4	64.01	3	2169.15	-1.36174	110.656
eSTDVEDLFIAHIAGMDTLAR	1	CL5371.Contig1_All	0.968138	14	1.01487	14	64	3	2608.32	-1.41477	90.4731
nEVIALVNLLHR	1	CL1482.Contig2_All	0.988629	2	1.11056	2	63.99	3	1695.02	-1.8279	85.8855
nAENMNFAEVEk	1	Unigene16287_All	1.42784	3	1.39677	3	63.99	2	2004.02	-4.16077	51.4569
tAVSIEESVILVQAIADAAHR	1	Unigene278_All	1.0389	6	1.00161	6	63.94	3	2497.39	-0.433859	100.486
iQTPTDEVVVPYDTLAPVPEDAAETk	1	Unigene9511_All	1.08166	2	1.14063	2	63.9	3	3406.81	0.535663	69.5318
qPLAQAVAQEIELALEk	1	Unigene14927_All	0.951535	5	1.26666	5	63.89	3	2459.43	-2.95473	105.707
iIEGDAEDLPFPTDYADR	1	Unigene20839_All	0.682372	3	0.791585	3	63.88	2	2341.14	-3.34013	72.7964
dLINVLEDAIR	1	CL8517.Contig2_All	0.805237	14	0.986496	14	63.85	3	1574.91	-0.28371	90.7152
yVYGTILDQIAk	1	CL5713.Contig2_All	1.04476	6	1.08779	6	63.82	2	1992.16	-1.50982	76.8377
lVLLEQVLHR	1	Unigene16173_All	0.999847	8	1.00118	8	63.77	3	1523.95	-1.88771	92.2822
tWVDSPGEMILTNLTTGDk	1	CL3914.Contig3_All	0.804917	1	1.04002	1	63.77	3	2686.42	-1.4627	86.57
gLLPPAVITQELQEk	1	CL7993.Contig1_All	0.994584	39	1.01838	39	63.75	2	2244.34	-0.356883	74.1871
sFDSLLDSLQEk	1	Unigene13923_All	1.05508	14	1.40478	14	63.72	2	1990.09	-3.04022	79.0179
sLITSVQDTASSFAk	1	CL2758.Contig6_All	0.853944	14	0.916422	14	63.72	2	2163.21	-2.72889	72.8021
vETMLGDTAIAIHPDDPR	1	Unigene661_All	0.99256	5	0.895175	5	63.71	3	2255.16	-1.52426	72.0882
dQIYDIFQLLPSk	1	Unigene5079_All	0.987779	7	1.31761	7	63.68	2	2188.24	-1.91918	90.1259
dISVLEDELTAVTEk	1	CL4559.Contig3_All	1.06304	4	1.48904	4	63.67	3	2270.25	-2.83573	89.9077
aYVPVHELMDGEEIDR	1	CL2542.Contig2_All	1.11397	18	1.01729	18	63.66	2	2177.08	-3.40226	64.4037
aFGAELVLTDAAk	1	Unigene13954_All	1.01973	3	1.06449	3	63.61	2	1914.1	-7.42033	69.405
tDALADALAIAQHHDAVSGTQR	1	Unigene20878_All	1.21945	3	1.0274	3	63.6	3	2565.33	-2.01873	75.4536
gFGLGGLTLLAk	1	CL2305.Contig1_All	0.900915	11	0.854953	11	63.57	2	1755.09	-2.98319	77.4177
eIVSTNPVVVFSk	1	Unigene1211_All	0.958204	4	0.929285	4	63.54	2	2027.2	-0.71602	63.441
sAAADEEEGSLAVAAk	1	Unigene16559_All	1.02342	2	1.08292	2	63.53	2	2127.13	-2.89648	48.7082
iPTNQIYPINYTDSAASVAGDYEQR	1	CL3807.Contig2_All	1.06974	1	1.08305	1	63.52	3	3090.53	-0.0464938	69.393
vAIGNHDEFR	1	Unigene220_All	0.994552	34	0.88017	34	63.49	4	1461.77	-2.2014	39.908
lVQLVQEMQHSk	1	CL2610.Contig1_All	1.00511	4	1.23678	4	63.43	3	2048.17	-1.65583	83.1699
mLSEIGSVDNIPDFIEGVk	1	Unigene14874_All	1.1169	3	1.2586	3	63.4	3	2671.44	-3.40817	91.9623
sAQDIALAELTPTHPIR	1	Unigene7197_All	0.974936	12	0.942898	12	63.39	3	2137.19	-1.60051	63.5344
lSTASAIATGAVLGTFDDTR	1	CL7269.Contig3_All	1.07354	1	1.12713	1	63.32	3	2271.21	-2.41738	86.8993
aADGDIVSAIMELTN	1	Unigene7425_All	1.12671	3	0.918828	3	63.27	2	1823.93	-0.989871	97.131
vEDIGALHLIPk	1	CL2542.Contig2_All	1.1241	12	0.89283	12	63.24	2	1913.16	-3.46377	71.8996
aLITDSHDVVPk	1	Unigene10113_All	1.0692	32	1.05896	32	63.22	2	1903.11	-2.26278	50.7952
qVTQcVLHLLR	1	CL8563.Contig1_All	1.02672	5	0.991638	5	63.2	3	1670.97	-1.44175	70.6686
fSQVTSNALDMk	1	CL236.Contig1_All	1.08384	3	1.11909	3	63.17	2	1949.06	-2.79674	63.4801
gGSSVFNVLDFGAk	1	CL3025.Contig2_All	1.04706	3	1.20861	3	63.14	2	2006.12	-0.00223442	75.3029
gAIIQVDAAPFk	1	CL3019.Contig3_All	0.940127	5	1.08714	5	63.11	2	1838.09	-4.97233	61.2025
eAMQELINNAk	1	CL8636.Contig1_All	0.923198	2	0.986034	2	63.1	3	1869.03	-4.11809	63.7411
qLTSGLLLVTGPYk	1	CL5633.Contig1_All	0.963971	17	1.03795	17	63.08	2	2098.27	-3.13694	73.8802
nTIEDEAVVLGAGAFEVAAR	1	CL8683.Contig2_All	1.00269	23	0.955067	23	63.08	3	2336.23	-6.09449	112.876
gIEMLHEDPVADIDIEk	1	CL2334.Contig1_All	0.984701	7	1.04909	7	63.05	3	2532.34	-4.32297	70.8566
sHETcPIDALk	1	CL4580.Contig3_All	1.77396	12	1.05558	12	63.05	2	1879.02	-1.40366	43.8132
nLPIHHIPGPEGVR	1	CL2581.Contig3_All	0.776506	10	0.899877	10	63.02	4	1840.05	-1.2442	45.9517
iINVIGEPIDER	1	CL9322.Contig1_All	1.12896	10	1.05634	10	63	3	1671.95	-4.92473	66.7934
aYETATITAEAELPPTHPIR	1	Unigene10076_All	0.949631	58	0.897843	58	62.99	3	2485.32	-1.20396	64.4808
gEASPFLAELLR	1	Unigene3223_All	1.0212	4	1.42095	4	62.97	3	1606.91	-0.331028	81.1695
gFIFGPPIALAIGAk	1	Unigene9859_All	0.916365	8	0.847801	8	62.97	4	2080.27	-2.81015	88.2705
rTDLPGAGESSESQETGGR	1	CL3545.Contig4_All	1.18715	1	0.825151	1	62.96	3	2238.08	-3.02723	34.3106
aLTVLEYLVAHGSER	1	Unigene772_All	1.41716	4	0.913751	4	62.92	3	1962.09	-1.08658	96.2881
aEcLASEVADQFk	1	CL6460.Contig1_All	1.19566	3	0.998863	3	62.92	3	2076.07	-7.70686	77.7158
eVGDTFDVVAAQTk	1	CL570.Contig1_All	1.00852	15	1.0572	15	62.91	3	2088.14	-2.02478	59.9184
lQSILMPLSEFEHAEk	1	CL1953.Contig2_All	0.859483	6	0.777707	6	62.9	3	2480.36	-2.5415	91.3367
dITFQNTAGPSk	1	Unigene13722_All	1.18071	4	0.993568	4	62.89	3	1887.04	-3.2261	45.5041
yEDQIDSFAEk	1	CL3331.Contig1_All	1.08461	5	1.08835	5	62.87	2	1953	-3.26054	60.0892
aVAEEMGIGFLGIGFQPk	1	Unigene14692_All	1.2854	4	1.24058	4	62.87	3	2472.38	-1.14545	88.4392
nAVFGDSSALAPGGVR	1	Unigene9783_All	1.1014	4	1.04875	4	62.84	2	1821.97	-2.28317	53.9081
sLLALQGPLAAPVLQHLmk	1	Unigene8230_All	1.01562	5	0.998484	5	62.82	3	2624.57	-2.71137	81.3285
iFFIAWSPDTAk	1	Unigene4849_All	1.01944	7	1.00288	7	62.79	2	2004.14	-1.7535	84.8008
vLNTGSPITVPVGR	1	CL9322.Contig1_All	1.19052	7	1.08233	7	62.71	3	1714.01	-1.03714	56.0658
nYPTVSEEYLNAVEk	1	CL1920.Contig1_All	1.10521	8	1.1389	8	62.71	2	2364.23	-8.42501	64.5109
nLQDIIAILGMDELSEDDk	1	CL9614.Contig1_All	0.9375	6	0.969915	6	62.71	3	2740.45	-1.379	99.8396
tFITTDINPYFDSFVR	1	Unigene16996_All	0.95866	2	1.05127	2	62.69	2	2240.16	1.62093	84.2872
aQGLFTFASLEER	1	Unigene9945_All	0.933812	9	0.904458	9	62.66	3	1772.95	-1.53834	77.3457
dLDEFVTFINEk	1	Unigene18823_All	0.988342	12	1.06125	12	62.64	2	2078.12	-2.05919	86.7821
yEQLYQDFGVk	1	CL2334.Contig1_All	1.05778	5	1.06859	5	62.56	3	1998.07	-2.93427	74.8604
fEANLSIPEYVk	1	CL4238.Contig2_All	1.08083	3	1.29232	3	62.56	2	2018.14	-1.68768	68.845
vHDDmLLAASEALAGQVTQEHYDk	1	CL7993.Contig1_All	0.857321	11	0.911624	11	62.55	3	3265.66	-1.39711	76.8028
aADVAAGEASk	1	CL1475.Contig1_All	1.00393	5	1.06805	5	62.54	2	1597.89	-4.45654	37.8305
nLAFLSAVINEGk	1	Unigene10046_All	0.995625	3	1.10856	3	62.52	3	1984.17	-0.0231713	83.8141
wGVNVQPYSGSPANFAAYTAVLNPHDR	1	Unigene9783_All	0.914593	2	0.929933	2	62.52	3	3235.62	-1.49531	79.4251
lYDFFYQNSTPVLDQAEk	1	CL7823.Contig1_All	1.08982	1	0.93509	1	62.51	3	2786.44	-3.03002	86.872
yPQNMIDYVDQENLAPFk	1	CL9513.Contig1_All	2.42888	4	2.60878	4	62.51	3	2793.43	-1.52659	79.5001
sSMDAFAQILk	1	CL3734.Contig3_All	1.05229	23	1.07813	23	62.5	2	1819.02	-3.13188	71.1356
vVDLDDYAADDEEYEEk	1	CL5406.Contig1_All	0.957657	1	1.70777	1	62.45	3	2626.24	-5.4653	64.0141
gMLAVYNSLSEDGk	1	Unigene7529_All	0.971058	3	1.07914	3	62.42	2	2092.12	-1.79937	71.9649
eSDGDIVSAIMELTN	1	CL7574.Contig2_All	1.01727	1	1.1445	1	62.39	2	1897.93	-1.47835	95.0448
lITPSVLSDR	1	CL5169.Contig1_All	0.986162	6	1.14058	6	62.38	3	1404.83	-2.74596	56.1382
ikDYLLMEEEFVANQER	1	CL1714.Contig1_All	1.136	2	1.11178	2	62.35	3	2735.44	-3.51661	88.088
lSYIALDFEQEMETAk	1	CL937.Contig10_All	1.00966	3	1.01681	3	62.33	3	2496.31	-3.58639	97.4926
dIIAQFALQEFGHLR	1	CL8360.Contig1_All	1.03725	7	1.17085	7	62.3	3	2062.14	-0.298035	96.5168
fTAEDIMQTID	1	CL290.Contig2_All	1.1225	1	1.25242	1	62.29	2	1587.79	-1.57161	79.6364
iEEVPELPLVVSDSVEAAEk	1	CL8545.Contig3_All	0.91255	6	1.06779	6	62.29	4	2761.53	-2.42668	88.5667
qTLDLGSTGLLPLEVR	1	CL6375.Contig1_All	0.981888	4	1.0582	4	62.28	3	2016.17	0.494035	74.6371
mVHLATIPITGTGINPAR	1	CL150.Contig8_All	0.97749	7	1.00937	7	62.27	2	2166.24	2.02257	64.6888
eLPGVLALDEAIPVAV	1	CL2817.Contig2_All	1.00634	3	1.15414	3	62.19	2	1910.11	-1.01169	91.2842
aGDSTPEELATATQVAGPYLPIVR	1	CL1518.Contig1_All	0.981573	6	1.10344	6	62.19	3	2760.47	-1.13458	78.699
dADPTLSHADQILAVADTILAGDR	1	CL7372.Contig1_All	1.16474	5	1.09157	5	62.17	3	2782.45	-2.43937	99.4554
iLVTGGAGFIGSHLVDk	1	CL3930.Contig3_All	1.00967	7	0.773774	7	62.14	3	2292.35	-3.55451	75.0162
fIQYNVLGNLFEVPSk	1	CL5316.Contig5_All	0.963634	2	0.880396	2	62.12	3	2476.4	-2.2967	91.5434
aEEYGTVEASDR	1	CL6977.Contig1_All	1.04398	19	1.02154	19	62.1	2	1630.78	-1.15401	37.6578
yETIDFPFQPVDGLEHNGPFR	1	Unigene16855_All	1.09453	3	2.03209	3	62.1	3	2782.37	-2.78897	80.9115
lSADTVEADEQFGELGAHMR	1	CL5431.Contig1_All	0.960975	1	0.971984	1	62.07	3	2480.2	-2.84022	70.9247
lHSLEMPPAEFDHVEk	1	Unigene3122_All	0.819239	11	0.856081	11	62.07	3	2487.31	-1.28164	62.3172
gTLIDEDPLAVYk	1	CL9568.Contig1_All	0.866403	3	0.806139	3	62.06	2	2042.16	-3.23268	68.6461
eLVEVIEGGDAMEE	1	CL6472.Contig1_All	0.981901	2	1.04896	2	62.04	2	1823.88	-4.40186	77.8373
gVLAPVLQFHR	1	Unigene21119_All	0.808793	7	0.658755	7	62.03	3	1540.92	-1.16391	63.4096
dQIYDIFQLLPPk	1	CL3452.Contig4_All	1.07088	21	1.06279	21	62.03	3	2198.26	-2.52195	90.2263
qIQELVEAIVLPMTHQER	1	Unigene18614_All	1.05516	7	0.998065	7	61.98	3	2438.34	0.0350844	104.602
lAEmPADSGYPAYLAAR	1	Unigene18805_All	1.09743	7	1.08867	7	61.96	2	2116.07	-0.949077	58.101
hGETFEDHLR	1	Unigene18973_All	0.722301	3	0.803933	3	61.94	4	1544.77	-1.67996	35.4563
aIWVSWWSQADk	1	CL4965.Contig4_All	1.2055	54	1.03781	54	61.94	2	2085.13	-1.43783	86.2217
gILGSVGAEADADQIELLLSQVk	1	Unigene12005_All	1.13332	1	1.0506	1	61.94	4	2934.66	0.7167	97.5915
lPNATEGTDHLR	1	CL1920.Contig2_All	1.10881	14	0.918606	14	61.93	3	1627.87	-1.90771	41.7126
gISVPGMSASLQYFDTYR	1	Unigene7665_All	1.2205	3	1.15319	3	61.93	3	2296.15	-1.87327	80.9846
iVMELYADVVPk	1	Unigene20748_All	0.84776	3	0.798544	3	61.91	2	1985.15	-3.25273	89.9845
aFGVTDFLNPNDHDQPIQQVINR	1	CL8301.Contig1_All	1.06908	2	1.33207	2	61.91	3	2942.5	-2.54812	76.7291
nAPAIIFIDEIDSIAPk	1	CL4207.Contig2_All	0.879503	5	2.04078	5	61.89	3	2435.39	-3.53058	98.1082
dAINVEQAFLTMAAEIk	1	Unigene7182_All	1.07497	6	1.05526	6	61.89	3	2472.36	-1.5606	101.838
yDLSSLTSVLSGGAPLSk	1	CL1414.Contig2_All	1.24517	1	1.16843	1	61.87	3	2403.35	-1.87775	83.0312
iVVVDSDLPSGESDk	1	CL2542.Contig2_All	1.10667	6	1.11729	6	61.85	2	2168.19	0.905479	56.728
iPSEVASEIETAVSDLR	1	CL5012.Contig2_All	1.26569	9	1.13539	9	61.84	3	2120.14	-1.5891	106.578
lNNHGTLGAVLQHEVIR	1	Unigene156_All	1.04718	4	0.951242	4	61.84	4	2175.23	-1.30917	60.3986
sSFDAFSQIVk	1	Unigene14289_All	1.4334	6	1.35204	6	61.83	2	1837.03	-2.62397	66.3878
hGVQATFVNTEFTHER	1	CL592.Contig5_All	0.789972	5	1.00589	5	61.83	4	2177.1	-0.679555	48.8631
fSFEETVATLHLk	1	CL7996.Contig1_All	1.11436	20	1.21733	20	61.81	2	2130.2	-0.887436	79.3264
vSQQLYSALTSLQMGLTEDk	1	CL807.Contig1_All	0.82153	2	0.901711	2	61.8	3	2820.52	-1.51598	98.404
gVVYATEALLAEHGk	1	CL1630.Contig1_All	1.47964	5	1.67172	5	61.79	2	2166.23	-3.64376	79.0845
mMIVDDEYIIVGSANINQR	1	CL2542.Contig2_All	0.948119	2	1.02648	2	61.79	3	2501.27	-1.00594	112.841
fQDLGVQFVENLDEGNmR	1	CL3780.Contig6_All	1.2465	2	3.66799	2	61.75	2	2431.19	2.5923	89.3331
iFDHQGPLSSTFPIENR	1	CL773.Contig1_All	1.22593	3	1.0469	3	61.74	3	2262.18	-1.42524	69.5476
eHGAPDDEVR	1	CL9067.Contig1_All	0.996923	13	0.897901	13	61.73	3	1428.7	0.498465	23.9331
aSITPGTVLIILSGR	1	CL5633.Contig2_All	1.08913	3	1.0267	3	61.72	3	1802.1	-3.36496	89.9699
nIEEQTHQHVDAR	1	CL2071.Contig1_All	0.780623	4	0.810586	4	61.71	3	1880.95	-1.38308	31.677
vPGVTDLGLkPR	1	Unigene9294_All	1.19793	5	2.04714	5	61.69	2	1860.15	-3.20684	55.9448
eLDSNIEyGDSR	1	CL439.Contig4_All	0.714843	3	0.840412	3	61.69	2	2006.03	1.05084	45.3645
vLEQLSGQTPVFSk	1	CL4471.Contig2_All	1.05554	14	1.15391	14	61.67	2	2141.25	2.98879	71.7958
aLDLVEFTGSVTQAIPGPR	1	CL3699.Contig3_All	1.22533	1	1.0259	1	61.67	3	2275.26	-0.93335	87.8563
aAVEEGIVPGGGVALLYATR	1	Unigene14120_All	1.26616	2	1.03857	2	61.65	2	2247.27	2.30946	74.3511
tSVPVSEVIYGGLSAADLQk	1	CL1361.Contig1_All	0.985828	1	1.14405	1	61.65	3	2642.49	1.52742	79.4282
gIESLDLSYNNFHLGk	1	Unigene18870_All	1.11566	5	0.977149	5	61.64	3	2415.31	-3.02039	73.5458
iGDYLIEQGL	1	Unigene682_All	0.885761	9	0.940523	9	61.63	2	1424.79	-3.08466	82.2176
eLSDAVPIEEVAGNTHHDALHAVSWR	1	Unigene20526_All	0.909723	6	0.942827	6	61.63	4	3157.59	-1.58084	67.7173
yLDELILNDNMWDDGNSLGPk	1	CL4952.Contig2_All	0.939821	2	1.01409	2	61.61	3	3030.53	-0.0140688	90.0158
gNPNIAALYDk	1	Unigene9243_All	1.02821	1	1.23291	1	61.6	2	1784.02	0.753593	54.2423
dREVNPFGNDDVETDAER	1	CL3997.Contig5_All	0.958931	1	1.05982	1	61.6	3	2382.11	-1.49538	49.1854
ePVNNLLDAVk	1	CL7993.Contig1_All	1.0963	12	1.04319	12	61.51	3	1820.07	-1.50116	64.6724
aPEGTPPGGGVLVVTVHEAQDVEGk	1	CL4832.Contig1_All	0.867537	1	1.14097	1	61.49	3	3051.65	-1.64059	68.617
aDIHHLQQFIHGR	1	Unigene16969_All	0.946816	9	0.821835	9	61.46	4	1876.02	-1.27287	56.5594
iAAAADLIPVLSQFR	1	CL2142.Contig4_All	1.06487	14	0.779035	14	61.46	2	1889.11	-0.8362	98.9169
iSNFYTNFQVDEIGR	1	Unigene115_All	1.10434	9	1.12125	9	61.46	2	2107.07	-0.575456	76.6347
yTIDDASEIVNFAk	1	Unigene593_All	0.973138	3	1.1533	3	61.45	3	2194.18	-1.08325	73.3979
aPALPASLR	1	CL3704.Contig3_All	1.20292	5	0.893302	5	61.42	3	1199.74	1.02279	47.3777
vTLFLNLANDPTIER	1	CL7428.Contig1_All	1.00591	17	0.985737	17	61.42	3	2020.14	-1.06025	88.2042
lVSGLPDGGVILLENVR	1	CL3885.Contig1_All	1.12762	7	1.38598	7	61.36	2	2055.21	-1.85384	83.4799
nLDLSHNLVFGk	1	Unigene18870_All	1.06134	6	0.995663	6	61.34	2	1965.14	-1.0236	62.4912
qPEHVMTFLLAEMGTSGSLDGQQR	1	CL1993.Contig1_All	1.11087	2	1.09466	2	61.29	3	2936.45	-1.00558	90.4862
dFIFGGATSAYQVEGGFSQGGR	1	CL3477.Contig5_All	1.03273	26	0.908527	26	61.26	3	2555.24	-3.02571	113.071
eDLQLVESVVDSAk	1	CL8316.Contig2_All	0.998051	2	1.12798	2	61.24	2	2140.2	2.42222	84.1789
qAGAEFDYLETALHk	1	CL8644.Contig2_All	1.38629	4	1.82763	4	61.24	3	2301.23	-2.76126	76.5784
vIENANVIMATYEDPLLGDVQVYPEk	1	CL1787.Contig1_All	0.925409	3	1.19396	3	61.24	3	3528.89	4.63649	91.6036
lQHDLISATSDLR	1	CL1988.Contig1_All	0.885203	2	1.04077	2	61.23	3	1772.98	-1.60794	63.4503
sIDVTSLQHDLDLLPGGDLTEIGER	1	CL3204.Contig2_All	1.19599	1	1.27047	1	61.22	3	2997.56	-3.4781	88.1407
rDEDLLVLPTDAALFEDPSFk	1	CL832.Contig1_All	0.887998	4	1.01569	4	61.22	3	2999.61	-1.74817	83.2571
sSVLESLAGISLPR	1	CL3408.Contig1_All	1.40519	8	1.35324	8	61.21	3	1733.01	-0.469265	82.2535
mIYEPILEEGVFR	1	CL151.Contig6_All	1.16278	4	0.989773	4	61.14	3	1900.02	-0.0490225	80.2598
lLSVDPANYDDAPVEGIR	1	Unigene14032_All	1.23453	1	1.40883	1	61.14	2	2248.18	3.78561	69.8427
hGDSALTVDELLR	1	Unigene7110_All	0.906241	1	1.63288	1	61.09	3	1729.93	-2.94487	58.8252
rDEGSFTVSNTNVFAALDSLR	1	CL1807.Contig1_All	1.00987	1	0.959537	1	61.06	3	2603.32	-8.02446	82.4067
vATHNmDDGAPLSEQTISQALATAR	1	CL6240.Contig2_All	1.16468	1	1.09647	1	61.04	3	2917.45	-3.51591	68.7025
tLTAVHEAMLEDIVYPAEIVGk	1	CL7914.Contig3_All	0.899698	11	0.999464	11	61.03	3	3007.66	-1.77382	87.3685
eLAIQNMEVLLk	1	Unigene16822_All	0.956349	5	0.992155	5	61	3	2009.19	-2.13754	82.6302
eTNESLEDASNELILTDEEIVR	1	Unigene18787_All	0.908731	1	1.0434	1	60.98	3	2823.4	-0.904002	81.2031
gLGEYLPLDSGHEGAEIGSLR	1	Unigene16505_All	2.77313	2	1.06122	2	60.95	3	2474.28	-0.969805	70.2753
gTSSQVQAAQQLIQEFIGGHR	1	CL2239.Contig2_All	1.04935	3	0.819072	3	60.95	3	2559.36	2.62996	94.9148
sSNAVTEANPSDR	1	CL2758.Contig4_All	0.690693	6	0.707576	6	60.93	2	1651.81	-2.46055	29.1581
vLVLLDDFAIk	1	CL1897.Contig1_All	1.05657	4	1.25091	4	60.93	3	1854.15	-2.8257	102.032
iQAISLPMILTPPHk	1	Unigene16822_All	0.952828	4	0.932179	4	60.93	3	2267.37	-2.48713	81.5091
iPLFSAAGLPHNEIAAQIcR	1	CL7428.Contig1_All	1.0529	5	0.772787	5	60.91	3	2482.35	-1.27981	76.241
aQGDADSALDR	1	CL6317.Contig1_All	0.934999	12	0.857773	12	60.9	2	1422.71	-4.19529	32.1412
aIGPQDVLATLLNNLk	1	Unigene16519_All	0.981532	5	0.891361	5	60.9	3	2288.37	-2.3451	105.897
vTSVASFFVSR	1	Unigene13923_All	0.978214	7	1.16089	7	60.89	3	1503.85	-0.559632	76.0354
lDFVADHPFVFVVR	1	CL5496.Contig2_All	1.38902	8	1.12622	8	60.89	3	1965.09	-1.19621	83.8727
vYSEAVPGVLDAAAR	1	Unigene11974_All	1.13448	6	1.04229	6	60.88	3	1822	1.86691	62.4748
gELLTALASFGHEmTLNEANR	1	Unigene14489_All	1.18435	6	0.99234	6	60.88	3	2594.32	0.118559	86.875
aISTSSAYNDQFR	1	Unigene13923_All	1.0187	2	1.24696	2	60.85	2	1763.89	0.231982	46.1058
kPLSVAPGNTVLYSk	1	Unigene16189_All	0.719136	2	0.721833	2	60.82	3	2486.51	-0.688049	54.7282
fIEFFGHAPDIYAR	1	Unigene21093_All	1.12326	15	1.0797	15	60.8	3	1987.04	0.284864	85.0998
iDGVDGEVVGLFGVFDGHGGAR	1	CL1261.Contig2_All	1.04785	9	0.962707	9	60.8	3	2477.26	-3.65132	91.2107
dIFQEVYEANWk	1	Unigene2407_All	0.970784	9	1.11107	9	60.78	3	2150.13	-3.38256	80.7788
vGHDNLIGEIIR	1	Unigene18805_All	0.943155	11	0.89889	11	60.77	3	1639.94	0.286274	62.9544
iVIGLYGDDVPQTAENFR	1	CL9308.Contig1_All	1.05938	4	1.08343	4	60.77	3	2311.22	-2.59898	73.2586
gAHEGQGLGNNFLSHIR	1	Unigene2735_All	0.781172	6	0.856317	6	60.76	3	2111.1	-2.37538	55.3757
hILQQLQNMNIVEmDTR	1	Unigene14425_All	0.92982	3	1.04011	3	60.75	3	2403.24	-1.48443	72.3792
vSGPVVVADGmAGAAmYELVR	1	Unigene18805_All	1.39866	1	1.24792	1	60.75	3	2428.25	-0.836097	63.4905
lENQDAIDAAIVGMLADPk	1	CL77.Contig6_All	1.42859	1	1.65883	1	60.75	3	2592.41	-2.35257	92.4721
sFVAEYPIVSIEDPFDQDDWEHYAk	1	CL7728.Contig1_All	1.70308	3	1.4671	3	60.75	3	3608.77	-0.833912	87.2612
fDGALNVDVNEFQTNLVPyPR	1	Unigene9258_All	0.588757	3	0.679539	3	60.67	3	3016.6	-1.0555	80.3147
gALDGGLDIPHSEk	1	CL2741.Contig2_All	0.929859	12	1.0744	12	60.62	2	2017.11	-2.78482	51.84
dYVEPPPAPFLGVGELk	1	CL150.Contig5_All	1.01995	23	0.820986	23	60.62	3	2436.36	-3.42461	73.1149
yLNTEEFIDAVADELk	1	Unigene2407_All	1.00877	8	1.12488	8	60.57	3	2478.32	-2.15449	101.057
nIMDMNAGLGGFAAALESSk	1	CL4541.Contig1_All	0.895691	1	0.675754	1	60.57	3	2605.35	-4.64015	86.9859
nTVNQIAQQIDTHDLGSMFSGLDSR	1	CL7197.Contig1_All	0.811896	1	1.05566	1	60.57	4	3051.51	-1.656	85.6289
vVPASEIPDGWMGLDIGPDSIk	1	CL3885.Contig1_All	1.06522	3	1.06626	3	60.56	3	2904.56	0.166246	83.9505
qALLAFLSQVPHEQR	1	Unigene21450_All	0.915063	7	0.897424	7	60.47	3	2041.14	-2.40688	84.6857
vYIGGDSAGANIAHNIALR	1	CL201.Contig2_All	0.980699	4	0.996652	4	60.47	3	2216.2	-2.40676	63.2812
aLLTDPSFHALVEk	1	CL1920.Contig2_All	1.35093	12	1.15276	12	60.44	2	2149.25	0.268612	67.8808
lFQTGGHVPETNYIFMGDFVDR	1	CL2092.Contig1_All	0.804759	2	1.01818	2	60.42	3	2847.4	-4.40525	82.8775
eAVLLVFANk	1	Unigene18259_All	0.841874	10	0.906097	10	60.37	2	1712.05	-5.4978	79.0332
aIELPDAmENAGAALIR	1	CL4916.Contig1_All	1.04179	5	1.11039	5	60.37	3	2075.1	-4.0302	62.7544
vFNFAAGPATLPENVLLk	1	Unigene14427_All	0.913664	6	1.07015	6	60.35	2	2509.46	-3.50896	84.9832
vIVNYISSPEVGFLR	1	CL506.Contig1_All	1.05635	9	0.921449	9	60.34	3	1997.14	-0.732494	80.4885
eHEEEVSNLNDEVIR	1	Unigene21024_All	1.08851	1	1.11361	1	60.31	3	2116.04	-4.41156	46.2566
iPSTEEIADR	1	CL9612.Contig2_All	0.721887	10	0.791674	10	60.3	3	1434.77	-0.430435	45.1021
lFIQIMDPDHEDR	1	CL4965.Contig4_All	1.35651	13	1.08805	13	60.3	3	1932.98	-1.29521	75.686
vGFSPQDNDGVVSASFVk	1	CL3747.Contig3_All	0.82847	4	0.90351	4	60.3	3	2461.31	-4.40905	62.2892
lIEDGSLDELVR	1	CL5371.Contig1_All	1.31681	6	1.24871	6	60.29	3	1662.92	0.613543	69.5544
nDFYITGESYAGHYIPAFAAR	1	CL8446.Contig1_All	1.0535	2	0.896045	2	60.28	3	2667.31	-2.4038	77.9111
aFEDPDIIHVDDTVDPVR	1	Unigene2735_All	0.950212	7	0.928875	7	60.26	2	2357.19	-1.37476	66.0256
lGFITGLVPR	1	Unigene19019_All	1.14381	9	0.981556	9	60.25	3	1376.85	-2.8423	83.7117
lVGVSEETTTGVk	1	CL3696.Contig1_All	0.838846	9	0.837092	9	60.22	2	1928.11	-3.57492	50.1729
tVLVDNADFLk	1	Unigene902_All	1.20316	3	1.15716	3	60.21	3	1843.07	-3.23175	64.9297
aFEVDLPDAEVGk	1	CL555.Contig1_All	1.06566	3	1.10948	3	60.21	2	1998.08	-8.88457	63.5437
eSIELPLMNPELFLR	1	CL4682.Contig1_All	0.998889	6	1.07229	6	60.21	3	2105.16	0.1778	92.5428
gLVDELGAEAMMMDALDkVEk	1	Unigene9673_All	0.949795	3	1.47173	3	60.21	4	3177.69	-2.52055	95.6382
fkFPENSVELYAER	1	CL6454.Contig1_All	1.03098	11	1.09335	11	60.2	4	2337.27	-1.26764	66.8532
fEELNMDLFR	1	CL9562.Contig11_All	1.1633	11	1.30963	11	60.19	3	1617.82	-0.916596	83.0447
lSHDADSEVAmAAIISLGLIGAGTNNAR	1	CL8636.Contig1_All	0.963724	2	0.73812	2	60.15	3	3087.6	-1.47476	92.9515
vAYALAQGLk	1	CL570.Contig1_All	1.20763	24	1.19571	24	60.11	2	1642.01	-3.12431	68.6752
fLYLMGADDVNLEk	1	CL1393.Contig2_All	1.00163	1	1.08677	1	60.09	3	2236.21	-3.31675	86.4168
vGINEIAESMMAFNTNYk	1	CL9325.Contig2_All	1.08461	4	1.0897	4	60.09	3	2640.36	-1.90482	88.2795
yAMYVEDGVVk	1	Unigene7516_All	0.887277	6	0.84438	6	60.08	2	1882.01	-5.95443	61.8723
aAQLDIVVTNk	1	Unigene12169_All	0.965429	3	1.15807	3	60.05	2	1780.07	-5.34123	56.1092
aVASQPISVAIEAGGR	1	CL1951.Contig2_All	1.12242	6	1.06806	6	60.03	2	1830.03	-2.06094	56.1653
aDAEVATIIGHEVGHAVAR	1	Unigene16647_All	0.986092	4	0.879334	4	60	4	2220.2	-1.71937	74.0262
eELGLIEQAYDNPHEALSR	1	Unigene9341_All	0.976781	3	0.949265	3	59.92	3	2488.25	-3.8596	71.638
nFGVTEFINPk	1	CL2799.Contig1_All	1.04811	8	1.11437	8	59.91	2	1874.06	-2.51968	64.3425
lEEAPLLIIQk	1	Unigene3673_All	1.14497	20	1.30147	20	59.9	2	1875.17	-1.96013	75.099
gPPALIFSFSQLEEk	1	CL7700.Contig1_All	0.986221	3	1.05395	3	59.89	3	2271.28	-3.88387	85.8075
qLSSGLLLVTGPYk	1	CL5633.Contig2_All	0.948641	3	1.15292	3	59.88	2	2084.27	3.99922	71.6725
iDGIDEENHIFk	1	Unigene251_All	2.25652	8	10.1433	8	59.86	2	2038.1	-2.97328	58.54
iAVLVGTVTDDIR	1	Unigene16882_All	0.942205	11	1.03513	11	59.84	3	1675.99	-1.11887	91.5808
lAMQEFMILPVGAASFk	1	CL7728.Contig1_All	1.05749	5	0.985926	5	59.83	3	2461.38	-0.834493	89.3315
fVGEPMTHLESIASSAVR	1	CL761.Contig4_All	1.14664	5	0.966449	5	59.78	3	2235.17	-2.67007	75.5084
wVFPDTNSGIIVLAEGR	1	Unigene5567_All	0.963218	3	0.848509	3	59.76	3	2178.18	-1.98994	83.6742
lDEIVVFDPLSHDQLR	1	Unigene2756_All	1.41694	7	1.0415	7	59.76	3	2200.19	-2.1537	83.9118
tIDSNVSEAEGIYSALEk	1	Unigene13923_All	1.071	4	1.21499	4	59.75	3	2534.34	-2.67429	77.8688
vHDDMLLAASEALAGQVTQEHYDk	1	CL7993.Contig1_All	1.20335	56	1.0435	52	59.75	3	3249.66	-0.752487	83.1614
nAAGAGSASAVQk	1	CL6082.Contig2_All	0.825121	1	0.753213	1	59.74	3	1739.98	-3.36991	29.9771
eLVEVIEGGDAmEE	1	CL6472.Contig1_All	1.21183	3	1.1797	3	59.73	2	1839.87	-4.78448	72.8128
fAVQQHNNNQNTFLEFVR	1	CL6314.Contig1_All	1.28084	2	1.01811	2	59.73	3	2510.28	-1.55069	70.5701
hLPLYEDMASk	1	CL5874.Contig1_All	1.00393	8	0.986833	8	59.73	3	1912.04	-4.21351	56.0179
hVLAVLDDLSAEELGAk	1	CL2753.Contig2_All	1.12793	11	1.0989	11	59.71	4	2388.36	-1.53479	84.4726
aDIVELISQLEAQNPTPAPTEALPLLNGk	1	CL2758.Contig2_All	0.846602	4	0.785787	4	59.7	5	3651.04	-2.6896	103.762
aLLVFIEHR	1	Unigene9948_All	0.961934	5	1.0766	5	59.68	3	1401.85	-0.419269	76.7881
lVADVLLDEVINR	1	Unigene9865_All	1.04627	6	0.99031	6	59.66	3	1773.04	-1.73178	93.4048
gLLQSDQVLFTDSTR	1	Unigene349_All	1.03875	1	0.875976	1	59.65	3	1984.06	-2.14307	65.8059
vVMELFADTTPR	1	Unigene17254_All	0.953865	29	0.952089	29	59.63	3	1682.91	-0.859491	84.5933
dFDEVLFQYFAAk	1	CL1361.Contig1_All	0.969583	5	1.00674	5	59.6	2	2201.17	-3.23722	93.6439
vTAELLFGADNAVIQEQR	1	CL1916.Contig2_All	1.19925	1	1.15195	1	59.6	3	2278.23	-0.352701	80.0572
yDRNPFDEEEEVNPFADGGAR	1	CL1049.Contig3_All	0.984494	2	1.08945	2	59.59	3	2731.25	-1.59871	67.4578
fGEIEEGPLGLDk	1	CL7095.Contig2_All	1.0746	2	1.20976	2	59.57	2	2012.11	-2.7076	69.161
nQGLEIIPR	1	CL8671.Contig1_All	1.25818	4	1.08844	4	59.54	3	1343.79	0.0101892	48.2586
aEDLQNLLTk	1	Unigene14983_All	1.06975	9	1.03907	9	59.53	2	1753.03	-2.5408	69.5831
gFGFISFDSEDAVDR	1	CL6395.Contig1_All	1.0782	4	1.03352	4	59.53	2	1965.94	-3.91628	72.9665
vPDAQVITEHPPLR	1	Unigene9780_All	0.959676	10	0.859989	10	59.51	3	1876.06	-2.16319	54.2565
gVEADNIEEMYk	1	CL2741.Contig2_All	1.0301	5	1.116	5	59.51	2	2006.02	-6.53755	56.9819
sDVATLNQISENEk	1	Unigene9511_All	1.00112	4	1.13689	4	59.5	2	2156.17	0.808206	52.0172
lQEVEDWLYEDGEDETk	1	CL1361.Contig1_All	0.979233	1	1.1865	1	59.49	3	2706.31	-4.69003	92.2513
aDQITAHIPPAAAALTNIVDSAAQR	1	CL3500.Contig2_All	1.01739	5	0.905091	5	59.47	3	2819.53	0.8954	87.8534
dDGIYIINIGk	1	CL3621.Contig1_All	0.978061	7	1.11835	7	59.46	2	1829.06	-3.59709	64.993
dVTGNVSESTEDAAAk	1	Unigene3183_All	0.891226	14	0.900167	14	59.44	3	2202.13	-1.45698	39.8477
nLSDTAYDNFLDHTFLGDR	1	CL5175.Contig2_All	1.19317	2	0.932346	2	59.42	3	2518.21	-1.38042	81.017
dPDGYLFELIQR	1	Unigene902_All	1.2861	4	1.21002	4	59.4	3	1769.93	-2.20481	82.4526
gILIQIISEDIDPVTk	1	CL5479.Contig1_All	1.06254	1	1.19836	1	59.4	3	2362.4	-1.66734	98.1308
dSEIAMGAYQPYHLATR	1	CL2542.Contig2_All	0.884305	2	0.883313	2	59.4	3	2227.11	-0.812589	58.0304
rFEVVYNLLSTR	1	Unigene19473_All	0.927786	6	0.891622	6	59.38	3	1801.02	-1.74134	79.6676
aNYQATTNLILQVAGHk	1	Unigene9242_All	1.27214	1	1.03603	1	59.34	4	2450.4	-0.497181	77.4978
iQDALSEIVGR	1	Unigene9925_All	1.00879	5	1.01136	5	59.29	3	1504.86	-2.85219	80.3348
iNLAGHDEYIVR	1	Unigene7529_All	1.10127	12	1.28324	12	59.28	3	1703.93	-2.03278	53.2536
fEATEDGGSVIk	1	Unigene10113_All	1.07452	12	1.56291	12	59.28	2	1861.01	-2.00991	49.3149
yQSFDSELGAQIEAGk	1	CL5371.Contig1_All	1.29351	2	1.15957	2	59.28	3	2351.23	0.424104	68.441
lAPYIQDIFNITSk	1	CL5513.Contig2_All	0.946297	4	1.16808	4	59.27	3	2231.28	-3.40375	98.0207
lSNDWTSNVIEETTQMDHQR	1	Unigene5741_All	0.899451	1	1.03013	1	59.27	3	2708.29	-1.29928	74.9561
aLLLQIAGHk	1	Unigene9243_All	1.03214	8	1.14912	8	59.27	2	1672.06	-4.94385	66.786
gYPGYmYTDLATIYER	1	CL7428.Contig1_All	1.04555	5	1.08896	5	59.25	2	2233.08	-0.433412	69.6697
eGLAPINLIVETEMHR	1	CL807.Contig1_All	0.83006	5	0.812881	5	59.23	3	2126.15	-2.5667	82.301
fPANADFHLFR	1	Unigene12315_All	0.986555	4	1.02149	4	59.21	4	1638.87	-2.11353	68.5503
lEPGYPLIIGGINIPHDR	1	Unigene9891_All	0.787895	4	0.682343	4	59.2	3	2278.28	-1.71646	75.4242
hNLGMTFYEPTVITEVk	1	CL1216.Contig2_All	1.22006	2	0.983525	2	59.16	3	2587.41	0.162091	68.7883
aELDELEREDFFR	1	CL1706.Contig2_All	1.08148	4	1.0819	4	59.16	2	1972.99	-1.22343	71.7173
lVAALGGVQR	1	CL20.Contig3_All	1.58138	3	1.33109	3	59.15	3	1287.8	-0.263742	60.6684
sVGALVALYER	1	Unigene9906_All	0.960029	5	0.977247	5	59.12	3	1481.86	-2.87075	73.8944
dGVILLWDLAEGk	1	CL1892.Contig1_All	0.964728	20	1.00972	20	59.09	2	2037.18	-1.36919	96.1974
lQTVFANSPSSLDVLR	1	Unigene21093_All	1.04239	5	1.01742	5	59.09	3	2051.15	1.44965	77.7888
vQELNVYEINER	1	CL3644.Contig1_All	1.12627	11	1.03861	11	59.08	2	1809.96	-3.28814	60.1027
fYNPDEETYDSSQTAFk	1	CL8371.Contig1_All	1.5669	2	3.29055	2	59.07	3	2650.27	-2.75627	59.9619
mDHELESQIGAk	1	CL8480.Contig1_All	1.12933	6	1.14814	6	59.07	2	1966.05	-1.24969	51.0731
tVESLALDIEELADk	1	Unigene3732_All	0.926933	2	1.12563	2	59.06	3	2254.26	-3.21851	98.4399
vESELNTLVEASk	1	CL168.Contig1_All	1.1364	3	1.08397	3	59.05	2	2027.15	-1.31612	75.8635
aLASLHSADVDAIGLR	1	Unigene14495_All	1.11636	3	1.04157	3	59.03	2	1913.08	-0.0505089	63.2878
fQIGEVFAHVPk	1	Unigene18787_All	0.837955	4	0.878022	4	59.03	3	1980.15	-3.26083	74.1855
eLYNNTFADAEk	1	CL759.Contig4_All	1.16545	4	0.836865	4	59.02	2	2023.06	-1.63886	53.9905
tPLLQLMNDALIVAk	1	Unigene5884_All	0.93982	6	1.0938	6	59.01	3	2248.35	-1.17671	101.911
gLLPDTHELAATAAR	1	CL7712.Contig1_All	1.15778	7	1.4134	7	59	3	1840.02	-1.93853	55.6421
aALDAFFLGk	1	Unigene7025_All	0.650854	25	0.684828	25	58.97	2	1660.98	-4.38697	78.8511
aLHGGNFQGTPIGVSMDNTR	1	CL1389.Contig4_All	0.851437	1	1.24365	1	58.95	3	2376.19	-7.41492	55.8253
aMLGQWEEAAk	1	Unigene2767_All	1.12268	1	0.971134	1	58.94	2	1842	-2.75914	62.9486
ySGALESFYEk	1	Unigene18805_All	1.15496	6	1.1198	6	58.94	2	1902	-4.15364	66.232
eTAENAWESAk	1	Unigene3183_All	0.840209	4	0.930568	4	58.88	2	1843.96	-5.23204	49.0576
aISNAGLEASk	1	CL3403.Contig1_All	1.06018	2	2.30895	2	58.87	2	1668.96	-6.39007	41.521
iMTAAAQLVkPVTLELGGk	1	Unigene3268_All	1.2172	5	1.06997	5	58.84	3	2852.74	-0.780507	90.5287
eEDVHVGANkFPER	1	Unigene5560_All	1.11428	7	1.06641	7	58.84	2	2235.2	-1.22823	44.0556
hVDVSSLEVAAPILIPR	1	CL6298.Contig1_All	0.904564	5	0.841475	5	58.81	3	2120.24	-1.25152	73.024
iYNVFDNQLPAALk	1	CL3570.Contig1_All	0.993103	4	1.0613	4	58.78	2	2214.26	-6.65334	79.3419
lSELLGVEVk	1	CL3885.Contig3_All	1.01756	19	1.02427	19	58.76	2	1695.04	-5.30805	78.9678
lADDTENTIEAAk	1	Unigene13923_All	1.03754	9	1.20734	9	58.72	2	1999.08	-2.28507	56.4409
yFEVILIDPAHTTVR	1	CL3627.Contig2_All	1.29305	18	0.894293	18	58.71	3	2078.15	-1.95511	77.989
fANAFSNAVESMk	1	CL1216.Contig2_All	1.18834	6	1.13552	6	58.7	3	2024.07	-1.30506	82.5115
fQDLGVQFVENLDEGNMR	1	CL3780.Contig6_All	1.45797	4	3.59152	4	58.69	3	2415.19	-1.97811	93.1855
gFLQQPDFVk	1	Unigene21049_All	0.990641	8	1.06095	8	58.68	2	1787.02	-5.21153	60.8381
lTASPLLLFLPGIDGAGHGLk	1	CL9392.Contig1_All	0.912749	11	0.772243	11	58.68	3	2698.61	-2.03698	95.3476
gVEELADAVk	1	CL2530.Contig3_All	1.31788	5	1.16647	5	58.67	2	1638.94	-6.17168	59.6003
nQLSGSIPDLFSGLTDLR	1	Unigene18870_All	1.04986	4	1.21672	4	58.65	3	2237.21	1.17295	89.6764
gFLIEDAVGEDVVGELTk	1	CL2941.Contig2_All	1.00138	3	1.05437	3	58.64	3	2499.37	-3.60902	86.2927
eLDSNIEYGDSR	1	CL439.Contig4_All	1.03679	11	0.890967	11	58.6	2	1701.82	-2.97117	44.1014
lVDSLADPR	1	CL4965.Contig4_All	1.17762	14	1.04506	14	58.59	2	1289.74	-1.10426	54.8438
vVSLPANLDFMIFNHR	1	CL3221.Contig1_All	0.892678	4	1.07493	4	58.59	3	2177.18	-1.22935	87.5491
aANLTVESYWPSLFAk	1	CL2550.Contig2_All	1.04421	4	1.07509	4	58.54	2	2405.33	-1.00842	85.4541
aTAEEWVNMVNDLQk	1	CL1700.Contig1_All	0.741676	1	0.702501	1	58.53	3	2356.23	-5.77668	83.2852
vEVVTPEEHLGDVIGDLNSR	1	Unigene18612_All	1.06575	3	1.04102	3	58.53	3	2482.31	0.961318	73.1027
nYNIPLVADIHFAPPVALR	1	CL8614.Contig1_All	0.835226	5	0.712524	5	58.49	3	2424.37	-1.20543	82.8595
hGAINLGQGFPNFDGPEFVk	1	CL1250.Contig3_All	1.07779	3	1.22386	3	58.48	3	2752.47	0.94577	73.4628
yDDLSEQSFYMVGGIDEVIAk	1	CL9614.Contig1_All	1.23945	2	1.11222	1	58.48	3	2987.51	-2.74147	87.45
fATNVPGVYAIGDVIPGPmLAHk	1	Unigene18627_All	1.11659	5	1.32604	5	58.48	3	2991.66	-1.19727	77.5958
iPGLISASSFDGk	1	CL1375.Contig2_All	0.9518	3	0.927009	3	58.47	3	1900.1	-0.557423	71.276
iAHMAQLLLTESNR	1	Unigene16835_All	1.10511	1	1.25693	1	58.45	3	1901.05	-3.07834	84.1134
vGDAVVALHR	1	Unigene9808_All	1.06899	3	0.863728	3	58.43	3	1340.79	-2.36013	47.7446
lVNTVEEDNEk	1	CL745.Contig1_All	1.1176	4	1.63329	4	58.41	2	1898.03	-1.72008	49.1029
lQFLSLLDNNITk	1	Unigene14706_All	0.90443	4	0.918127	4	58.41	3	2127.26	-0.315821	93.1285
aFVEHYYSTFDANR	1	Unigene11883_All	1.03573	9	1.03039	9	58.39	3	2023.98	-2.72432	64.2657
aGPGASPFGEAFGPEMWVk	1	Unigene21049_All	1.12154	1	1.59499	1	58.38	3	2543.31	-2.95456	80.4313
aSTLDGLDSLLSIVQMPR	1	CL6027.Contig1_All	0.947017	2	0.889623	2	58.37	3	2220.22	-0.0990361	98.4701
dILQGMDLVMk	1	Unigene16765_All	1.44628	4	1.17791	4	58.36	2	1871.06	-1.68648	76.8617
lMTVQSEAASGGSSTSWLFk	1	CL8636.Contig1_All	0.977102	1	1.19269	1	58.36	3	2695.42	-0.96886	77.948
gHSASILDYGGVGDGETLNTk	1	CL7049.Contig1_All	1.29016	1	1.00444	1	58.36	3	2699.41	-0.77216	56.7719
lWGENFFDPATk	1	CL1787.Contig1_All	0.974721	8	1.05342	8	58.34	2	2033.09	-2.23082	77.1935
yHLIIVQDGDPSk	1	Unigene11461_All	0.884063	7	0.976336	7	58.33	3	2093.18	-3.84304	55.7647
vLQLETAAGAAIR	1	Unigene9511_All	1.25775	31	1.02024	31	58.32	3	1616.96	-4.78275	70.9567
eLELLLMHNR	1	CL3645.Contig1_All	0.879347	9	0.925863	9	58.32	3	1571.89	-0.844439	71.7871
lPIVILGPDSDLk	1	CL1414.Contig2_All	1.11802	6	1.19476	6	58.31	2	1988.22	-1.64462	75.2909
iQVEHPVTEmISSTDLIEEQIR	1	Unigene14513_All	1.06598	2	1.15062	2	58.27	3	2887.5	-1.77547	66.0953
aIEAVADLk	1	CL6952.Contig1_All	1.1165	8	1.31621	8	58.26	3	1537.94	-3.1672	64.4472
vIEYTPGVSAVGIk	1	CL982.Contig1_All	1.04315	2	1.06188	2	58.26	2	2041.21	-1.62039	61.4389
gAYTYVSELWk	1	CL3627.Contig2_All	1.00948	6	0.939076	6	58.23	2	1925.06	0.14371	76.0517
sLGVNFTPFEQSVk	1	CL119.Contig9_All	1.13792	2	1.16774	2	58.2	2	2161.21	-0.0657319	68.8648
aAFGAEEVSR	1	Unigene14406_All	1.07001	4	0.773511	4	58.17	3	1340.71	-2.39415	40.3791
gLESDELEALYk	1	CL2741.Contig1_All	0.977518	6	1.03723	6	58.15	2	1975.08	-3.10703	65.4694
eGLTQVLISTDLLAR	1	Unigene16822_All	1.1027	4	1.10717	4	58.11	3	1933.13	2.25728	84.502
eQQDDYAVQSFER	1	CL3403.Contig1_All	1.12957	2	1.94862	2	58.08	2	1918.9	-2.34146	49.1956
eEQDNYAVQSFER	1	CL3403.Contig5_All	1.01524	1	2.45463	1	58.04	2	1918.91	-0.496636	48.752
aAFGTDISFDTATGNFTk	1	Unigene874_All	1.03261	2	1.0494	2	57.99	3	2472.27	-4.75019	69.0005
aAETNDDSAVIDPR	1	CL1839.Contig3_All	1.04047	1	0.901412	1	57.98	2	1777.88	-3.17009	37.3807
lITFGEGSQYk	1	Unigene251_All	1.38313	8	4.2475	8	57.98	3	1851.03	-7.13686	60.7051
vELTNLLSALGEk	1	CL3933.Contig4_All	0.900092	5	0.852973	5	57.98	3	1995.19	-3.51099	88.4106
fSGLcFSDTR	1	Unigene14383_All	1.08445	18	1.05029	18	57.97	3	1493.74	0.722963	59.2597
lLILEHGLDASSITASGPR	1	Unigene7999_All	1.18856	9	1.08757	9	57.96	3	2254.27	-0.899309	81.1374
iFELLHSPATGFSVITPANLQR	1	Unigene2762_All	1.00877	3	0.666622	3	57.96	3	2715.52	0.930259	91.7061
aASDTAFVTk	1	CL5281.Contig1_All	1.01803	2	1.12809	2	57.94	2	1618.92	-2.18562	42.1881
lYDLLLQNTADLSDLVSSGR	1	Unigene7804_All	0.886097	1	0.966901	1	57.91	3	2497.34	-2.54711	108.849
iEMHVGAVQPGER	1	Unigene9859_All	0.848169	8	0.756926	8	57.89	3	1726.92	-2.30516	46.2683
vSGVSLLALFk	1	CL3689.Contig2_All	1.02404	24	1.02792	24	57.89	2	1742.1	-3.41396	88.732
vVSIDAYEDVPSYNEk	1	CL1951.Contig2_All	0.920733	10	0.916073	10	57.89	2	2436.27	-4.12633	62.6301
lLLVQALR	1	CL12.Contig3_All	1.0372	5	0.97938	5	57.85	3	1229.82	-1.69604	76.7012
gAADFLQEVTSk	1	CL745.Contig1_All	1.17011	7	1.44092	7	57.8	2	1874.05	1.57926	72.251
dSVVAGFQWASk	1	CL1787.Contig1_All	1.0615	7	1.00043	7	57.8	2	1903.05	-0.972138	65.4767
yENLVEAGVIDPAk	1	CL4916.Contig1_All	0.849295	1	1.12381	1	57.8	2	2126.19	-0.933276	66.7026
fSYVDIPADLQELAQEYR	1	Unigene18612_All	1.08803	1	0.910115	1	57.79	3	2461.25	-0.209814	101.009
nPVVASAALVSGIHLLQTNPEIVk	1	CL8183.Contig4_All	0.891281	2	0.853979	2	57.78	4	3078.81	-2.45885	89.848
lMDAVDSYIPDPIR	1	CL2355.Contig1_All	1.06172	4	1.38442	4	57.77	2	1909.01	0.580089	85.73
mFIEEVmELVELNPLR	1	CL745.Contig1_All	1.22121	3	0.916664	3	57.77	3	2298.2	-3.15967	106.748
lLADLATAIDEEDLAk	1	CL8905.Contig1_All	1.06899	4	1.4736	4	57.71	3	2309.3	-2.81323	99.4677
mVVAAAGAVk	1	CL9325.Contig2_All	1.07592	5	0.978677	5	57.7	3	1524.94	-1.81992	51.5627
fYSLDSLQTVSNPVR	1	CL38.Contig1_All	1.10252	5	0.891654	5	57.7	3	2030.08	-2.40947	70.5456
aINVLPLLTPAVLEk	1	Unigene10247_All	1.12354	9	1.04489	9	57.67	3	2199.39	-3.94082	86.8668
tMLEIVNQLDGFDAR	1	CL3223.Contig1_All	0.983312	4	1.04247	4	57.66	2	2026.06	2.47112	91.0635
iYVSNVSAELEPk	1	CL7095.Contig3_All	0.925386	3	1.01782	3	57.65	3	2057.16	-5.92808	60.7273
lPSISDFFGGk	1	CL2305.Contig1_All	0.995697	15	0.927856	15	57.64	2	1776.01	-1.40111	81.9947
eSTDVEDLFIAHIAGmDTLAR	1	CL5371.Contig1_All	1.15819	4	1.13034	4	57.63	3	2624.31	-2.07335	82.7616
fASDFASAMVR	1	Unigene349_All	0.921652	3	0.628155	3	57.62	3	1505.77	-0.659999	70.2803
eADIQLLLAAEAHLGTk	1	CL3621.Contig1_All	0.971655	78	0.943608	78	57.61	3	2401.38	-2.79744	87.0624
qEDLTSPLPGWIIESLk	1	CL8328.Contig1_All	0.47585	2	0.89483	2	57.61	3	2534.43	-1.21594	91.8555
eGPLAEENMR	1	CL1787.Contig1_All	1.85116	5	1.07221	5	57.58	3	1449.74	3.37489	39.5708
iVIVDVDDHR	1	CL2862.Contig2_All	1.17043	11	1.02209	11	57.58	3	1484.84	-0.441231	52.6505
sESDFAEYAELISHk	1	CL5098.Contig1_All	1.06048	3	1.21976	3	57.57	3	2334.2	-4.45836	76.134
rPPGYAFIDFDDR	1	CL5447.Contig1_All	1.00188	3	0.88738	3	57.56	3	1872.95	-2.6216	64.3212
eSQEALAPLVEVALk	1	Unigene7770_All	0.969021	5	1.04061	5	57.55	2	2205.29	-1.39733	77.2472
lGPNYLQLPVNAPk	1	CL4965.Contig4_All	1.17981	26	1.02866	26	57.53	2	2132.26	-1.82019	65.6402
vDEIFGPINESYFSVk	1	Unigene21432_All	0.911676	4	1.07046	4	57.53	3	2452.32	-2.86044	84.5087
eAGVEIDPLGDLNTESER	1	CL4610.Contig2_All	1.02863	1	1.3781	1	57.51	2	2248.13	1.55691	63.7153
lPYGVTFPGYPTGR	1	CL325.Contig1_All	1.26609	13	1.85889	13	57.5	2	1828.99	0.180796	69.3424
qALFDLAVFR	1	Unigene5411_All	1.10794	2	0.958467	2	57.48	3	1483.86	-0.743595	83.5694
eIEDEGYIIk	1	CL3704.Contig4_All	0.906931	46	0.870286	46	57.48	2	1817.01	-2.06883	57.8027
mLLQPELVLEDVSQDHAR	1	CL1217.Contig4_All	1.01508	2	1.05564	2	57.47	3	2397.28	1.05524	85.6365
aANVTGPDGASVQGSTR	1	CL3663.Contig2_All	0.959699	6	1.09383	6	57.44	3	1891.97	-2.1657	30.2987
sIDGGAAFGFPDTPEDAAk	1	CL2542.Contig2_All	1.12412	6	1.03118	6	57.44	2	2474.25	-4.58523	62.6482
lQEAILNFTNR	1	CL4776.Contig2_All	1.04734	3	1.20667	3	57.43	3	1622.92	-0.532124	81.7473
dQTSAVDVLLTDADk	1	CL4403.Contig1_All	1.10039	1	1.21699	1	57.43	2	2199.2	3.57948	69.638
qIPLTGPHSIIGR	1	CL9067.Contig1_All	1.25624	23	1.35702	23	57.42	3	1693	-0.841917	54.4089
sELEYYAMLSk	1	CL1761.Contig1_All	1.06887	5	1.02379	5	57.41	2	1942.04	-4.19992	68.5866
fDYILTQQALVAVDNATPINR	1	Unigene7529_All	0.972578	3	1.10481	3	57.41	3	2666.42	-10.3924	92.6301
aLYEAALPAFDVLGk	1	Unigene864_All	1.06011	5	0.952586	5	57.4	2	2186.27	0.755483	85.2761
vAGIAPFDVcFSSENVGSTR	1	CL5994.Contig1_All	1.22156	2	1.41277	2	57.4	3	2417.2	-2.74183	73.3504
yYPVEPNVVEQEMAEVPIA	1	Unigene16192_All	1.03991	6	0.973832	6	57.4	2	2481.25	-0.713866	84.3187
tLTAVHDAMLEDIVYPAEIVGk	1	CL7914.Contig2_All	0.922678	8	0.979126	8	57.39	3	2993.64	-1.59028	87.412
yFHALGAGSIEEVR	1	Unigene9203_All	0.758412	2	0.88603	2	57.39	4	2157.19	-2.26185	58.0846
gGESVLDLSPR	1	CL7993.Contig1_All	1.10569	12	1.1239	12	57.38	3	1433.79	-0.366033	49.4774
iSLSFGDAYGNQVYAPR	1	CL2482.Contig2_All	1.21168	2	0.999102	2	57.33	3	2162.11	-3.599	67.9586
eLLLDALSPLGADAVk	1	Unigene16653_All	1.09608	2	1.4733	2	57.31	3	2233.32	-1.82262	87.81
aGNIAPEEALHIGDSMR	1	CL4961.Contig2_All	1.23199	2	1.00804	2	57.3	3	2085.06	-2.64354	61.7631
eNITNFEEHDFQILR	1	Unigene21019_All	1.01622	1	0.942543	1	57.29	3	2209.11	-5.65329	69.8758
iVQIILEQNHTLESSVQPR	1	CL6447.Contig1_All	1.2769	1	0.894396	1	57.28	3	2508.41	0.310456	87.0883
eGADAVMLSGETAHGk	1	CL5670.Contig2_All	0.835863	2	0.794557	2	57.27	3	2181.14	-3.06015	47.5812
dATDDFEDVGHSASAk	1	Unigene18980_All	1.09854	1	1.81872	1	57.27	3	2273.1	-5.37917	46.9443
aFEPILLLGR	1	CL7250.Contig1_All	0.904899	22	0.959033	22	57.24	3	1432.88	-1.49964	81.4449
lALALGDENEVPMPVAAAANEAFk	1	Unigene864_All	1.36015	1	2.05171	1	57.23	3	3049.65	1.04027	86.3416
iGPHGVEIPGLR	1	Unigene1152_All	1.0384	2	0.859036	2	57.22	3	1548.91	-1.53377	57.8108
lAEISDLFILk	1	Unigene229_All	1.12881	19	1.10741	19	57.22	3	1870.15	-2.16856	95.4279
fSVGSGSPYAYGVLDSGYR	1	Unigene16192_All	1.13665	5	1.19648	5	57.22	2	2286.13	-1.0164	68.9585
eYQIIDTLVGPSLk	1	CL5255.Contig2_All	0.975087	8	1.03324	8	57.2	3	2184.27	-1.38641	82.3776
vQTGVMLFNR	1	CL7769.Contig1_All	0.979111	3	1.01618	3	57.19	3	1468.82	-4.18235	59.0838
vMDFGSVFLVNQSk	1	Unigene3223_All	1.02445	2	1.48316	2	57.17	2	2179.19	-5.50894	82.0805
eGLHYNPYFPGGAIAMPk	1	Unigene2532_All	1.16938	7	0.976406	7	57.14	3	2570.36	-3.06547	67.8687
nLIEVADQDYEk	1	CL8517.Contig2_All	0.910894	5	1.05588	5	57.13	2	2045.09	-4.00871	59.9855
mVGYALQAADILAk	1	CL4460.Contig3_All	1.25976	14	1.18232	14	57.13	2	2072.2	-3.32039	93.1541
fAGGLYTTTVEAFVPNTGR	1	CL3195.Contig2_All	1.04358	3	1.32608	3	57.11	2	2305.22	2.27658	81.3242
lGSQLDIIAPIkY	1	Unigene7387_All	0.970853	5	1.17351	5	57.08	2	2039.23	-3.82606	74.8567
iGLAGLAVMGQNLALNIAEk	1	CL6554.Contig1_All	0.994941	9	1.22524	9	57.08	3	2604.52	-5.04758	100.673
sALAILmNLGLIEESk	1	Unigene18791_All	1.30878	4	1.2427	4	57.06	3	2326.34	-4.47563	95.5584
iSATSIYFESLPYk	1	Unigene9783_All	0.992309	8	1.03651	8	56.97	2	2227.24	-1.94766	76.9527
lLNDLTIALDQQNVDFk	1	Unigene3665_All	0.96491	3	1.15044	3	56.97	3	2568.44	-1.88367	94.8909
tLLSTENYQVV	1	CL1046.Contig1_All	0.965778	1	1.05687	1	56.94	2	1570.86	-1.26796	62.1747
dFEQIAEFLHR	1	Unigene9783_All	0.895665	17	0.925068	17	56.94	3	1708.9	-0.553914	80.9316
lQSSLPEVNNIIk	1	Unigene7770_All	1.04429	5	1.10942	5	56.94	2	2063.23	-2.77979	66.2743
gLPVALVEYEGEQHGFR	1	Unigene337_All	0.974124	3	0.896338	3	56.94	3	2205.16	-1.44547	76.9107
gIPAILGIISTQR	1	CL9163.Contig2_All	0.746986	3	0.841551	3	56.93	3	1643.01	-1.12058	85.8106
hLTGSLTSAEGLR	1	Unigene10098_All	1.80476	3	0.851779	3	56.93	3	1645.91	-2.15486	47.4337
vIEIYEASSTEIk	1	Unigene871_All	1.09153	35	1.05887	35	56.91	3	2090.18	-1.00485	111.686
qILVLLDDLSLk	1	CL4288.Contig1_All	1.04252	5	1.21302	5	56.88	3	1978.24	-2.5929	99.9306
aNPLATVLSAAmLLk	1	Unigene20843_All	0.988142	3	1.58529	3	56.88	3	2137.28	-2.9824	98.5747
vFAHQDILDLAk	1	Unigene19540_All	1.01086	11	1.0248	11	56.88	2	1978.15	-4.1146	68.7959
sDSQVFLFANSk	1	CL3900.Contig1_All	0.98578	2	0.978619	2	56.87	2	1951.07	-0.511192	61.2257
eIEIDIEPTDTIDR	1	CL71.Contig11_All	1.15696	4	1.05038	4	56.86	3	1963.01	-3.67564	61.4816
mFEINFENEk	1	CL3195.Contig2_All	1.09317	5	1.16343	5	56.85	2	1908.99	-2.43962	69.0669
qGPVDAYLFSLIDEDAk	1	CL3889.Contig1_All	1.12752	4	1.20986	4	56.85	3	2489.33	-1.99736	90.3689
fSDGDVLVFPEMIIYR	1	Unigene5579_All	0.912165	2	1.06052	2	56.84	2	2205.15	-0.892701	92.8269
iPAWYAVLEDNELk	1	Unigene661_All	1.08746	2	0.939554	2	56.84	3	2269.26	-3.46845	88.4272
eSGTEkPIVAFIAGLTAPPGR	1	CL3225.Contig1_All	1.19104	6	1.20742	6	56.84	3	2719.56	-0.461515	91.5329
aTGLGHLVPGGIGAEAQSAAVR	1	Unigene7430_All	1.1175	7	1.00529	7	56.82	3	2336.3	-0.0907967	61.6574
dHPPTVEVMTDENISDLk	1	Unigene5219_All	0.914551	4	0.985569	4	56.82	3	2648.37	-0.109619	61.8041
dVEDISAISGDFEGk	1	CL4946.Contig1_All	1.01298	1	1.09099	1	56.8	3	2190.13	-4.89353	68.1421
vPIEVTMGELk	1	CL1269.Contig1_All	1.08891	8	0.989376	8	56.79	2	1824.07	-3.49852	67.0968
tYSNSPNTFESDFAAAMIk	1	Unigene2890_All	1.10462	2	0.770767	2	56.76	3	2702.35	-4.11999	78.8936
sHLFNNILNEPDFWTATEk	1	Unigene21007_All	1.03743	6	0.930114	6	56.74	3	2884.51	0.351054	82.7169
lIVTVEDLLPk	1	Unigene14949_All	1.10804	4	1.30012	4	56.71	3	1848.16	-2.40603	93.9398
gNVVGLNLHTGEPIDPQMEGIFDNYSVk	1	CL8683.Contig2_All	0.958084	1	0.923675	1	56.71	4	3651.88	-2.9086	78.726
iSEDLAHVEAR	1	CL3545.Contig4_All	1.10476	3	1.03078	3	56.7	3	1543.83	-2.16233	52.1834
dkIPSEVASEIETAVSDLR	1	CL5012.Contig2_All	1.13284	4	1.34898	4	56.68	3	2667.46	-2.34202	99.149
lSQYLDVVELHLVk	1	Unigene9484_All	0.894484	1	0.776693	1	56.66	3	2264.34	-4.6429	90.1462
fPDLIHAFkPNPk	1	CL4965.Contig4_All	1.41008	47	1.14727	47	56.65	2	2436.45	-2.45941	73.1549
vNQAIYLLTTGAR	1	CL7769.Contig1_All	0.943002	32	0.987562	32	56.56	3	1724	0.694322	81.8515
vLEDGDLETIGMLDYDkR	1	CL5713.Contig2_All	1.09318	3	0.944346	3	56.56	3	2690.41	-1.16038	76.3055
sLGVDILTGVGTILGPQk	1	CL1044.Contig3_All	0.888289	5	1.03075	5	56.54	3	2376.42	-4.2404	91.4242
tPGPGAQSALR	1	CL6421.Contig1_All	0.910429	6	0.914378	6	56.53	3	1358.77	-0.642858	28.3458
iMSNAPVPMSPLESLASSAVR	1	Unigene9808_All	1.00348	3	1.01941	3	56.52	3	2461.31	1.71317	81.8091
iEQLNSAIDNVSNQLR	1	CL4050.Contig1_All	1.05182	3	0.851507	3	56.51	3	2118.14	-0.85324	81.3542
gEGLFEGLDWLSNTLk	1	Unigene178_All	0.873461	1	0.778591	1	56.51	3	2387.3	-4.14828	99.0219
gVFAAGDVQDk	1	Unigene893_All	1.00254	3	1.03463	3	56.49	2	1714.95	-6.4947	45.9401
gFGHIGITVDDVHk	1	CL3780.Contig5_All	1.08657	6	0.954846	6	56.48	3	2103.18	-1.67465	55.8926
nAVEAYVYEMR	1	CL1361.Contig1_All	1.08294	5	1.12211	5	56.46	3	1648.83	0.105165	66.318
lLALIDDVYk	1	Unigene696_All	0.984874	6	1.20631	6	56.46	2	1771.08	-3.58642	95.569
iEELVGVPIHYIGIGPGR	1	CL2698.Contig1_All	1.00908	4	0.939077	4	56.46	3	2223.28	-1.25953	86.7148
iGPGYLPGPVLFVLEk	1	Unigene871_All	1.13953	22	0.987663	22	56.46	3	2307.39	-1.93117	93.8993
sLGVDTVPVLIGPVTYLLLSkPAk	1	CL9612.Contig2_All	0.949083	2	1.05417	2	56.44	5	3393.08	-1.61515	99.3383
aEEIMGQAIk	1	Unigene10247_All	1.15519	4	1.14438	4	56.39	3	1697.96	-4.46232	57.3558
lVGGDLVETVVAHDVIGR	1	Unigene18459_All	0.973675	1	0.874256	1	56.39	3	2153.23	3.5662	84.661
iALTDNSVIEQVLGk	1	Unigene2569_All	0.921447	4	1.16901	4	56.39	3	2208.3	-2.93331	84.3855
aAAVLAEEGGLIVk	1	Unigene21241_All	1.08834	2	1.07006	2	56.38	2	1949.19	-1.22416	72.6239
nYMPTWAFDHIk	1	Unigene896_All	0.693803	3	0.569677	3	56.38	3	2131.12	-3.69402	71.4629
qYANLVNLVPSMk	1	Unigene16628_All	1.1155	11	1.19351	11	56.37	2	2085.19	-2.06588	74.0566
tSQQVIIDLLDVGk	1	Unigene9294_All	1.05674	5	1.78469	5	56.36	2	2137.27	-0.135226	84.6484
iAAAVAEETNLPFVTAENk	1	CL1746.Contig1_All	1.02714	2	1.20305	2	56.36	3	2596.44	-0.145759	82.3885
qIQELVEAIVLPMTHk	1	CL1875.Contig5_All	1.00597	12	1.00553	12	56.34	4	2457.43	-2.40775	103.408
dIEGLPDTALGLAAQTAVSk	1	Unigene12609_All	1.0685	2	1.12442	2	56.32	3	2578.46	0.0857015	77.9897
vDEPcDVATPVAPk	1	CL6977.Contig1_All	0.914805	6	0.862639	6	56.3	2	2106.14	-0.5308	45.5035
lLAGVTIAHGGVIPNINPVLLPk	1	CL5952.Contig2_All	1.01367	53	0.882335	53	56.3	2	2914.8	-0.754885	85.7036
fFQDHLAYMk	1	CL3477.Contig5_All	0.705434	19	0.770049	19	56.27	2	1908.01	-8.95088	65.8648
vMELLGLGLGLDAGk	1	Unigene10128_All	1.06139	1	1.04825	1	56.26	3	2094.24	-0.70751	102.379
lEEIDMLQEVTk	1	Unigene18842_All	1.16661	3	1.08477	3	56.24	2	2056.14	-0.887522	77.6062
gVTSNPAIFQk	1	Unigene13923_All	1.06527	3	1.30355	3	56.22	2	1770.03	-1.30265	48.3447
tAANAIYVPPAQQGTIDLQSGILHAEEk	1	Unigene14983_All	0.999331	3	1.04827	3	56.21	3	3543.92	-1.43774	71.7828
lGALLDTMNALk	1	Unigene2946_All	0.907715	3	0.915961	3	56.18	3	1868.11	-3.34421	93.7849
eLDLVESFIPLVk	1	Unigene14685_All	0.967859	7	0.958332	7	56.18	2	2110.26	-1.39343	96.7431
lLLGEIPER	1	CL8617.Contig3_All	0.989284	7	0.944877	7	56.13	3	1343.81	-4.40555	62.9106
eADGIVDYLk	1	Unigene3673_All	1.16663	9	1.36316	9	56.12	2	1730.97	-3.77237	63.5056
vEPPIVTLDDLFR	1	CL5154.Contig2_All	0.952882	3	0.987637	3	56.12	3	1818.03	0.781505	90.5774
iFLLNTQNFIDGHTk	1	Unigene829_All	0.775698	7	0.859247	7	56.12	3	2369.32	-8.83468	80.5283
vAILGAAGGIGQPLALLmk	1	CL600.Contig2_All					56.09	3	2417.48	-1.02858	91.9787
lATWIEEINk	1	CL8644.Contig2_All	1.52879	5	2.39419	5	56.08	2	1825.06	-3.38406	85.3017
aVTFSDLHTEAGLk	1	CL5912.Contig1_All	1.00958	11	0.951035	11	56.07	2	2097.18	-0.858794	58.4008
fSIDGYDLNYk	1	CL6075.Contig1_All	1.38945	2	1.1044	2	56.04	2	1943.03	-2.96635	70.335
aQAYMNTADFDLAEFDIk	1	CL1725.Contig2_All	0.923579	1	0.937254	1	56.02	3	2671.34	-4.0301	84.7993
gLGMHVIAHDPYAAADR	1	CL676.Contig3_All	0.91319	5	0.916782	5	56.01	4	2098.08	-2.51336	50.9012
nILEDLELk	1	Unigene8157_All	1.17035	6	1.24012	6	56	2	1695.01	-2.63581	76.1149
tLDEALAGDNVGLLLR	1	CL4265.Contig1_All	1.18122	3	0.961613	3	56	3	1974.12	3.13456	78.5034
mIPTkPMVVETFAEYPPLGR	1	CL116.Contig9_All	0.962652	22	1.04315	22	56	5	2884.59	-1.65169	80.1976
aANFMSATLMDNETILk	1	CL8223.Contig2_All	0.917569	1	1.09169	1	55.99	3	2478.31	-2.07367	79.3865
sALTTQIAEEADIAEVIETVk	1	Unigene9919_All	0.662577	2	0.911757	2	55.95	3	2839.57	-3.15487	95.4557
gLYFGMYDSLkPVVLTGk	1	CL6379.Contig1_All	1.26605	2	0.980369	2	55.94	4	2900.66	-3.29955	81.7567
kLLDELGIPAEDVPVDQFTPLGR	1	Unigene6931_All	0.999658	4	1.5507	4	55.94	3	3130.76	-0.306129	84.0762
sIFQAADDLFDLPTEVk	1	CL6938.Contig1_All	1.01007	2	0.791661	2	55.92	3	2517.37	0.619578	94.4202
yEDQVDAFAEk	1	CL3331.Contig3_All	1.03458	4	0.898219	4	55.91	2	1922.99	-3.97749	57.2804
iFISELLVDQMSPEAQk	1	Unigene17157_All	1.15504	2	1.13168	2	55.9	3	2556.42	-1.58673	91.0595
eNFFFAGVDk	1	CL982.Contig1_All	1.03491	3	1.034	3	55.88	2	1781.96	-4.77952	68.9222
lADLVGVTLGPk	1	CL8517.Contig2_All	0.848801	15	1.07172	15	55.87	3	1791.12	-2.52839	79.0301
lMALIGQALk	1	Unigene1199_All	1.02346	2	0.867616	2	55.84	3	1666.05	-3.92094	95.53
dDADFLVDALDYAISk	1	Unigene14092_All	0.975972	3	0.851122	3	55.84	3	2379.25	-2.42815	102.746
eGLVLLIDAIEk	1	Unigene10463_All	0.928598	10	1.09642	10	55.82	3	1921.18	-2.87163	98.4279
sAIELDLLELIk	1	CL5535.Contig5_All	1.03877	4	1.28077	4	55.82	3	1965.2	-3.34847	97.8695
lAHLLSSSVHLEAR	1	Unigene1079_All	1.29992	3	0.985727	3	55.82	4	1837.06	-1.29421	69.2327
aTIFPHNVGLGVTR	1	CL1700.Contig1_All	0.770868	6	0.613902	6	55.79	2	1786.02	-2.32031	57.7523
lVDVHEVQDITHLPFAER	1	CL5043.Contig1_All	0.71665	3	0.874199	3	55.78	3	2422.3	-2.8574	75.8523
iASAANAIV	1	CL2630.Contig2_All	1.16979	2	1.12935	2	55.74	2	1133.68	-2.30374	58.3143
lLVALVSSYR	1	CL7235.Contig1_All	1.01644	41	0.735439	41	55.7	3	1424.88	-0.149231	89.7343
tRPSDTLSSISAAVYGGLVSADQIk	1	Unigene12305_All	0.954329	4	0.900249	4	55.7	3	3144.73	-0.961572	87.7754
hIAEEDDDEF	1	CL8617.Contig3_All	1.12705	2	1.33031	2	55.67	2	1523.68	-2.18009	42.382
aINPLELAMEALk	1	Unigene12341_All	1.13259	6	1.15078	6	55.66	3	2021.19	-2.67336	97.4292
aFALLSEEGIAk	1	CL4360.Contig1_All	0.983805	5	1.14901	5	55.63	3	1857.09	-3.2262	74.4549
dNVIAIMLDTk	1	CL5670.Contig2_All	0.876672	4	0.902322	4	55.62	3	1841.06	-3.66521	82.0413
gLPGITIDEER	1	Unigene18627_All	1.21804	7	1.27847	7	55.61	3	1503.83	-1.81002	52.7432
hVIDDNVLLQR	1	Unigene16851_All	1.02415	3	0.831432	3	55.58	3	1625.93	-0.815893	50.6365
iLITGGAGFIGSHLVDk	1	Unigene9837_All	1.00909	2	0.878504	2	55.58	3	2306.36	-3.0674	77.5718
sYLQEMLALVk	1	Unigene14418_All	1.16733	14	1.14336	14	55.57	3	1903.11	-2.94583	90.761
lVSNVLAIIk	1	Unigene13722_All	1.18878	34	0.914654	34	55.54	2	1678.1	-3.80715	88.894
hLVFPLLEFLQER	1	CL6716.Contig2_All	0.895637	15	0.998037	15	55.53	3	1945.12	-0.94665	97.5327
lALyDIADTPGVAADVSHINTR	1	CL1695.Contig2_All	0.800766	4	0.789666	4	55.51	4	2920.59	-1.55456	71.7794
tVAAAVAAAPSGSSR	1	Unigene13722_All	1.16168	10	0.77014	10	55.5	2	1619.9	-0.897016	41.6861
eGISEEQIEESIk	1	Unigene16628_All	1.1497	4	1.05433	4	55.5	2	2099.13	-0.228419	60.5723
gLVDELGAEAMMmDALDkVEk	1	Unigene9673_All	1.27435	5	1.38614	5	55.49	4	3193.69	-1.90951	91.663
iHFmLSSYAPVISAEk	1	Unigene9258_All	0.983497	7	0.809145	7	55.48	3	2417.33	-2.91012	71.2011
lVDAITFMLDPEVk	1	CL4484.Contig3_All	0.850324	3	0.870655	3	55.47	3	2199.26	2.0892	107.028
eAIDIAVAAFENYNVEk	1	Unigene7678_All	0.916163	3	1.14166	3	55.46	3	2504.35	-1.21976	93.8719
tAEALAEFVNNEGGTNVk	1	Unigene18823_All	1.02679	5	1.08477	5	55.45	3	2472.32	-0.734698	73.5754
nNADTTIYSIEk	1	CL5012.Contig2_All	1.13397	1	1.32504	1	55.43	2	1977.07	-2.11676	49.3542
eAGAVVPTSFEAFEGAIk	1	CL3301.Contig3_All	0.948856	4	1.51853	4	55.43	3	2431.32	-3.53977	77.1622
sLDDAHELIDTAISTALk	1	CL1523.Contig3_All	1.12921	28	1.16256	28	55.41	3	2521.39	-1.28871	92.3943
lANILHANELAR	1	CL6007.Contig2_All	0.733904	5	0.838464	5	55.41	3	1638.96	-1.82941	65.5358
gLTIFAPNDEAFk	1	Unigene3844_All	0.932867	11	0.856883	11	55.39	2	2031.13	-1.63192	69.0095
fVATEGEGFHLPAGR	1	CL2941.Contig2_All	0.834944	7	0.833288	7	55.36	3	1891.99	-4.42011	62.2794
nFAELLSEELk	1	CL3022.Contig1_All	0.858993	3	0.835372	3	55.36	3	1901.08	-3.92886	82.419
eNSSIDEIATSITEEALDk	1	Unigene3657_All	1.07865	1	1.35185	1	55.36	3	2673.39	0.549074	90.5596
aLGLELDLSDk	1	Unigene10106_All	0.945771	5	0.908886	5	55.35	2	1782.04	-3.5669	68.2792
nLPFNITSEEMYDIFGk	1	Unigene18962_All	0.908584	1	1.00658	1	55.35	3	2626.37	0.193538	92.1825
sTVGQYESHASFTLPGLYR	1	CL8671.Contig1_All	1.3371	1	1.20278	1	55.33	3	2417.22	-7.36548	67.6919
sATNLTEQFAALVALDQIPGk	1	CL6846.Contig3_All	1.0505	4	1.25945	4	55.33	3	2795.57	-0.637503	91.6446
rGGVDEPFAWESR	1	Unigene3223_All	0.899372	1	1.23207	1	55.33	3	1809.91	-2.9328	51.9536
fSVSPVVR	1	CL1787.Contig1_All	1.01551	10	1.17546	10	55.32	3	1194.71	-3.23061	46.5004
aGGDVFHELFR	1	Unigene14342_All	0.97528	16	0.697786	16	55.31	3	1551.82	-0.979154	68.9318
nIMFLGDGIGk	1	Unigene1175_All	1.04571	7	0.858629	7	55.31	2	1773.02	-2.05577	67.748
vEPYVTYGYPNLk	1	Unigene14163_All	1.09395	7	1.00689	7	55.3	3	2151.19	-3.15266	63.2446
nLVELVENVAEk	1	CL4023.Contig1_All	0.970627	2	0.857962	2	55.24	2	1965.14	-6.06651	85.5983
vNDNVLcLGFLDGGLNPR	1	CL5994.Contig1_All	1.1805	3	0.97383	3	55.24	3	2277.19	-4.959	82.52
eGDVLVHSAER	1	CL7459.Contig3_All	0.919611	1	0.701284	1	55.23	3	1515.8	-1.32375	39.2829
sGVTQPAAETS	1	Unigene862_All	1.19176	3	0.968648	3	55.22	2	1351.7	-2.59684	27.3396
eYVFVANSDNLGAVVDLk	1	Unigene9511_All	0.937667	27	0.98718	27	55.22	3	2561.41	1.88574	113.119
eIEDEGYIIR	1	CL3704.Contig3_All	1.04941	7	0.904273	7	55.18	3	1540.82	-0.513083	52.8605
hGANAGLVNALk	1	CL832.Contig1_All	0.644866	6	0.845205	6	55.18	2	1773.06	-2.28983	44.6809
dLLNEFLPDDVHIR	1	CL1489.Contig4_All	0.851122	4	0.766879	4	55.17	3	2000.07	-3.40118	79.3533
vAIAEAGAIPLLVHLLSTPDSR	1	Unigene18942_All	0.752942	2	0.881097	2	55.14	3	2547.48	0.465058	106.463
vDEALGFMQAAGLTMDHPVMk	1	CL9423.Contig1_All	1.15003	6	1.6729	6	55.13	4	2869.48	-1.43523	94.6684
tLDYGQAGDNVGLLLR	1	CL2355.Contig1_All	1.14885	3	1.11423	3	55.12	3	2009.1	3.1578	68.1193
lVQHQPTQYPTSEELSIGk	1	CL1039.Contig2_All	0.952497	1	0.918287	1	55.12	3	2763.5	-4.50349	56.1366
lHQTILESVDEFR	1	Unigene14556_All	1.06468	1	1.11685	1	55.12	3	1891.02	-1.02336	71.6978
eLGINALHIk	1	CL6421.Contig1_All	0.771216	10	0.747794	10	55.11	2	1716.06	-4.36807	58.7024
ePPPAPLFEPGELk	1	CL9248.Contig1_All	1.1489	5	0.91746	5	55.11	3	2129.2	-4.4291	64.0586
qIQELVEAIVLPmTHQER	1	Unigene18614_All	1.08963	10	1.02019	10	55.08	3	2454.33	-1.94684	92.9722
gELVSDDLVVGIIDDALk	1	CL2847.Contig1_All	0.920915	1	0.931416	1	55.08	3	2479.4	-3.65826	102.701
gQEGNEVFFR	1	CL4436.Contig3_All	0.916517	2	0.939968	2	55.07	3	1486.76	-1.83448	47.7231
lTLVDFDYLITk	1	CL555.Contig1_All	0.918259	4	1.18696	4	55.06	2	2049.2	-2.83747	90.1275
lNVVPTVTMLGVMk	1	CL1706.Contig2_All	1.08761	6	1.19847	6	55.06	3	2110.25	-1.84968	79.2954
rDEFEQISIPILER	1	CL1361.Contig1_All	0.97459	8	1.09757	8	55.05	3	2049.13	-1.57977	74.1963
aSHEESTEEALEFALEHAk	1	Unigene9808_All	0.870698	4	1.03962	4	55.04	4	2736.38	-4.02727	74.6513
nIAIPAYAVPLR	1	CL325.Contig1_All	1.34723	12	1.83694	12	54.96	3	1601.96	-3.19326	62.9599
aGTTFASAIQIGDPVSIDR	1	Unigene3156_All	1.16384	2	1.06177	2	54.95	2	2223.2	1.68731	69.4946
tEPATVAQDDEEVDESGVEPk	1	CL7574.Contig2_All	1.0304	1	1.19123	1	54.95	3	2853.4	-2.85792	48.359
iATVLMYLTDVEk	1	Unigene8064_All	0.993772	3	1.03416	3	54.93	3	2104.21	-3.16802	104.989
hVVDFYISDFQSGLR	1	Unigene986_All	1.00871	2	0.963666	2	54.9	3	2087.08	-5.22631	76.9228
sIEILHGDGGAGTIR	1	CL7087.Contig1_All	1.26133	33	2.09277	33	54.87	2	1799.99	-1.77685	52.4522
fTEHGIEGVVPLELLPPDVR	1	Unigene14232_All	0.834696	1	0.871864	1	54.84	3	2521.39	-1.95543	84.6826
lSEVTAWENSk	1	CL7025.Contig1_All	1.1135	4	0.869762	4	54.83	3	1872.03	-2.6134	68.9987
nVEILHGDGGAGTIR	1	Unigene1009_All	1.23089	12	1.70123	12	54.81	3	1812.98	-3.19142	45.9029
vAALVNDTIGTLAGGR	1	CL5693.Contig2_All	0.988283	4	1.06385	4	54.81	3	1832.05	-0.980255	94.7509
eGLLVGISSGAATAAAIk	1	Unigene7518_All	0.973196	3	0.971874	3	54.8	3	2237.33	-0.0941844	76.4298
fGLLDESQNk	1	CL3488.Contig1_All	1.02592	9	1.10754	9	54.79	2	1758.98	-4.08573	61.9211
iLSSGVHVVVGTPGR	1	CL3452.Contig4_All	1.32565	8	0.934743	8	54.77	3	1782.05	-1.42844	59.0231
fTDASVQGDMk	1	CL9562.Contig5_All	0.852471	5	1.09832	5	54.76	3	1806.94	-4.70514	47.8758
yGGDDVNLILAk	1	CL7235.Contig1_All	0.885157	9	0.832407	9	54.74	2	1886.08	-2.57461	64.4189
vLVDIVAAAANATPGLGR	1	Unigene10871_All	1.17726	4	1.08121	4	54.74	3	2012.17	-2.86328	98.02
gAIAVEE	1	CL5685.Contig3_All	1.0573	1	0.962264	1	54.73	2	992.554	-2.86409	36.2121
hIDAAILALk	1	Unigene14358_All	0.929238	4	0.928534	4	54.73	2	1673.05	-4.80172	64.8269
iEEELGSEAVYAGASFR	1	Unigene12201_All	1.13874	8	1.15171	8	54.71	2	2132.09	2.2738	78.0873
qVVNVPSFMVR	1	Unigene19151_All	1.13925	3	1.08736	3	54.7	3	1579.89	-1.93711	62.3509
gAESVEGVEVk	1	CL743.Contig2_All	1.30444	2	1.81465	2	54.7	2	1711.96	-6.84861	42.0963
lPADPFAEVALAFR	1	CL2704.Contig2_All	1.27782	3	1.34017	3	54.69	3	1821.02	-1.75217	92.4811
iGAADIDGFLQALQk	1	Unigene5559_All	1.45223	1	1.42661	1	54.69	4	2168.26	0.88669	92.1268
gTDLDALLDMSTDELVk	1	CL6791.Contig2_All	1.1344	4	1.17526	4	54.67	3	2444.3	-3.08095	87.4433
iFEVGDVVLLNEk	1	CL1969.Contig1_All	1.00446	2	1.27862	2	54.64	2	2083.22	-1.80285	87.1648
nNVEELEAVVGNSk	1	CL1988.Contig3_All	1.07925	2	1.04199	2	54.64	3	2110.16	-1.18731	65.865
vDTGSNLFTTITVDEPTPGLk	1	CL9312.Contig1_All	0.864955	2	0.955078	2	54.64	3	2813.54	0.498767	73.6154
vNHTyPLSQAAQAHTDLESR	1	Unigene14439_All	0.911206	1	0.868625	1	54.63	5	2846.49	-5.43007	46.6757
syELPDGQVITIGAER	1	CL937.Contig17_All	0.87635	3	1.04059	3	54.63	3	2356.29	-3.88213	66.6393
vAQWMLQIPGATSYMGSIGk	1	CL5874.Contig1_All	0.996988	1	0.968781	1	54.61	3	2746.49	-0.484902	90.6635
yDEFQEAIEk	1	Unigene5219_All	1.0249	6	1.13749	6	54.59	2	1879.98	-3.24531	63.1043
vHELGGPEVLk	1	Unigene14439_All	1.10432	8	0.887988	8	54.58	3	1786.06	-3.14325	49.5795
aIIISVIDNLVk	1	Unigene18796_All	0.970321	5	1.11585	5	54.58	3	1906.21	-2.55658	104.867
vYLLPEFQHVQVFVAGIQSPSAGR	1	Unigene3223_All	1.022	5	0.920915	5	54.58	3	2946.61	-1.46635	92.4791
qVFSQYGDLVHVk	1	Unigene16704_All	0.982441	7	1.02126	7	54.58	3	2128.2	-2.48397	64.9486
aNLVVGNVLPLR	1	CL851.Contig2_All	1.0994	8	0.927796	8	54.55	3	1568.98	0.055956	67.8996
hPDADSLYVEEIDVGELQPR	1	CL2827.Contig1_All	0.866622	1	0.954513	1	54.55	3	2586.29	-2.33904	68.7339
nPAYPDTLYVAPLVGPDTVSTMPDQALQAFIDHGSVAR	1	Unigene13923_All	1.39429	1	1.4001	1	54.55	4	4331.19	-0.268818	94.4647
aPTHALLNEEGVDLPR	1	Unigene416_All	0.866022	2	0.801085	2	54.5	3	2036.1	-3.50137	56.5913
eEEYIEWFEk	1	Unigene20839_All	0.737277	5	0.751621	5	54.49	2	2010.03	-2.00286	77.3408
lTIEDPVTVEYITR	1	CL1991.Contig2_All	1.00061	4	0.888498	4	54.48	3	1953.08	-0.230234	68.4146
vAGSIRPGEPAAPASLGmAAGPTVLEAVQELAk	1	Unigene14929_All	1.06557	2	1.25929	2	54.48	4	3783.09	-0.773799	86.2759
kTVTAMDVVYALk	1	CL9500.Contig1_All	1.00139	1	0.820114	1	54.47	3	2351.41	-2.99098	75.4236
hNLQVIHFR	1	CL2646.Contig1_All	0.685481	1	0.705759	1	54.45	4	1467.85	-2.1471	45.0163
yAVYDFDFLTEENVPk	1	CL2154.Contig2_All	0.836552	3	0.997358	3	54.44	3	2558.32	-1.89785	82.4606
kPPTPLLISYDPELIR	1	Unigene20729_All	1.12191	1	1.19659	1	54.43	3	2460.46	-2.8028	73.0785
aAGEVVDVR	1	Unigene16676_All	0.94772	3	0.939568	3	54.42	3	1219.69	-2.13779	37.1312
vVSLPANLDFmIFNHR	1	CL3221.Contig1_All	0.90866	3	1.02052	3	54.42	3	2193.17	-2.43619	81.6207
nNEVLAEEISER	1	CL5613.Contig3_All	0.793659	1	0.84656	1	54.41	2	1706.88	-3.01145	51.9715
vIYGADLAAFLQTLSk	1	CL3258.Contig2_All	1.04957	3	0.90107	3	54.41	3	2318.36	0.142452	102.093
aDRDESSPYAAMLAAQDVSQR	1	CL6421.Contig1_All	0.894915	3	0.986316	3	54.41	3	2585.25	-2.0115	61.3347
nPEEIPWGETGAEYIVESTGVFTDkDk	1	CL1347.Contig1_All	1.23619	1	1.28533	1	54.41	4	3924.03	-1.55294	87.0744
eDATVDDLIDVIEGNR	1	Unigene5969_All	0.816738	3	1.02451	3	54.35	3	2078.04	-5.75447	92.8495
eETGSNTPSTPAGLFFQHAGHR	1	CL1095.Contig2_All	0.910183	4	0.854731	4	54.35	4	2645.3	-1.61708	59.4032
gGFALHTLTHR	1	CL757.Contig2_All	1.16738	15	0.815024	15	54.33	2	1513.85	-0.529917	44.8433
sNAGGFLGDMVk	1	Unigene19197_All	0.878924	4	0.929617	4	54.3	2	1803.98	-2.73576	60.6719
qIQNFTLNFGPQHPAAHGVLR	1	Unigene5119_All	0.812524	4	0.838458	4	54.3	4	2649.43	-1.77801	64.5931
lSNQMGLEAAVEAAAEFLNk	1	Unigene13863_All	0.892616	4	1.28212	4	54.28	3	2714.46	-1.0235	106.597
lEGDVSFLFGk	1	Unigene2581_All	1.07591	12	1.03595	12	54.27	2	1820.04	-2.89604	84.372
gLISEILSR	1	CL2200.Contig3_All	1.06689	3	1.15444	3	54.26	3	1291.78	-4.32393	75.602
tTLTAALTMALASLGNSAPk	1	CL4265.Contig1_All	0.952873	4	0.886484	4	54.25	3	2540.46	0.55162	103.94
iAPSmLSSDFANLASEAER	1	Unigene511_All	0.913899	1	1.04812	1	54.24	3	2329.16	-3.42735	81.4617
eSLLEALTEHVk	1	CL7221.Contig2_All	1.34562	9	1.2585	9	54.24	3	1977.14	-3.22221	81.6068
lSHIANAEGLQVNEIALEELAER	1	Unigene20674_All	1.2653	1	1.33771	1	54.23	3	2823.52	0.167532	81.1268
lHSLEmPPAEFDHVEk	1	Unigene3122_All	0.900171	6	0.831037	6	54.22	3	2503.31	0.00202888	57.9346
vVDIVDTFR	1	Unigene21414_All	0.907525	25	1.08484	25	54.21	3	1367.78	-1.21748	76.9718
aPDSLLHETR	1	Unigene14883_All	1.10527	1	0.735227	1	54.2	3	1442.79	-0.268265	42.486
lVEGSYLDNFFk	1	Unigene19387_All	1.1018	7	1.16418	7	54.19	2	2040.13	0.855822	81.2465
lLEVFTHR	1	CL2646.Contig1_All	0.939842	5	0.99401	5	54.19	3	1318.78	-1.95503	72.6888
qFAAEEISSMVLMk	1	Unigene19001_All	0.969877	7	1.24279	7	54.18	3	2192.18	-4.27301	85.2215
eSDLVDWFIPLVk	1	CL5844.Contig1_All	0.910121	5	0.987828	5	54.16	2	2169.24	0.733141	95.3269
sTVAASAASSINPLFHIEALQNR	1	CL661.Contig2_All	1.96156	1	0.949068	1	54.13	3	2701.45	-2.80441	77.5308
qALQDIDMEk	1	Unigene3938_All	1.7091	7	1.07121	7	54.12	2	1798.98	-3.11776	53.7759
aFDAQDQSGGGGFISVEGFHQVVR	1	CL5394.Contig2_All	0.90715	1	0.673279	1	54.12	3	2812.41	4.84446	68.7701
yYSDLAGPENASk	1	Unigene16483_All	0.802789	3	0.990831	3	54.1	2	2023.06	-1.93561	49.454
dFMIQGGDFDk	1	CL9308.Contig1_All	1.13817	2	1.00405	2	54.07	2	1880.96	-4.27186	61.0615
sPIVVFEDVDLDk	1	Unigene3268_All	1.11216	4	1.16523	4	54.03	3	2084.17	-3.33043	76.9361
gILVHQVPLTIVDQPR	1	Unigene11994_All	1.0177	2	0.918543	2	54.03	3	2089.24	-0.938139	64.7199
aAELTTLLESR	1	Unigene115_All	1.02666	42	1.05519	42	54	3	1507.86	-1.52812	77.0876
vHGNPLSPAAQR	1	CL4293.Contig1_All	1.00985	10	0.58195	10	54	3	1550.87	-2.3573	34.5632
nRDPANYNLVDPPLMETIAVPR	1	CL1831.Contig2_All	1.33086	3	1.32164	3	53.99	3	2799.47	-2.35632	73.0134
aLRPYFELTNAVR	1	CL8617.Contig3_All	0.96897	6	0.977532	6	53.99	2	1854.05	-0.504401	69.9393
fFQSTALEVASHELk	1	CL8553.Contig1_All	1.0502	6	0.76453	6	53.98	3	2315.28	-2.41823	80.2268
sQVTAATGAIALIQLQEDMk	1	Unigene18974_All	0.908067	2	0.941918	2	53.97	3	2696.51	0.303669	85.4252
mLEGDLMELYk	1	Unigene14342_All	1.03032	10	0.690612	10	53.96	2	1950.05	-1.14976	79.9137
gVPEDEEIEEANDD	1	Unigene5606_All	0.746853	2	0.999514	2	53.95	2	1864.82	-2.18871	45.184
sQGGEVVAVGEGR	1	CL8944.Contig1_All	0.843477	1	0.889679	1	53.94	2	1548.82	-2.19039	35.436
nMSVIAHVDHGk	1	CL1787.Contig1_All	1.25115	7	1.06686	7	53.94	2	1916.06	-1.2007	44.1253
eLLSQIIVEAEEYk	1	Unigene920_All	0.855697	1	0.692262	1	53.91	3	2272.28	-4.31327	96.229
iSPDVVSMLLR	1	Unigene1913_All	0.958389	8	0.902031	8	53.9	3	1533.89	-2.27045	82.995
iDEVLNVLLk	1	CL3564.Contig4_All	1.56563	2	5.93355	2	53.89	3	1764.1	-3.44073	97.8726
yEVNPDMVGILEESGLk	1	Unigene568_All	0.800157	1	1.08925	1	53.88	3	2501.34	-2.1678	81.6466
gGSELVVEAGDQR	1	Unigene19866_All	1.01948	1	0.657475	1	53.87	2	1620.85	-1.04598	41.3835
fTILDAPGHk	1	CL6576.Contig2_All	0.973909	6	1.17498	6	53.86	3	1707	-3.1543	56.7823
aMAAEIEVVDGPNDEGEMFTRPGk	1	Unigene2532_All	0.971691	3	1.06567	3	53.86	3	3171.6	2.02676	70.5854
vETGIIkPGMVVTFGPTGLTTEVk	1	CL116.Contig9_All	0.976404	10	1.2146	10	53.85	3	3386.97	-0.133329	78.6242
iINVIGEPIDHR	1	CL9614.Contig1_All	1.0418	17	0.983864	17	53.84	3	1679.97	-3.1291	63.6861
iEEDDEETkP	1	CL6368.Contig1_All	0.71143	1	0.637891	1	53.83	2	1812.92	-8.31112	38.9798
gNTGDVNYFAQLIDEAEGLEk	1	CL6870.Contig1_All	0.895462	2	0.963505	2	53.83	3	2891.48	-1.77135	97.1097
qyLSDSEAVTENALEFLk	1	CL3704.Contig4_All	0.644143	3	0.85479	3	53.83	3	2969.61	-4.37549	83.7297
fTLTTYSPTGVTLTSTGTk	1	CL9312.Contig1_All	0.927368	3	1.14653	3	53.82	3	2584.43	-1.37895	66.4234
tLHQALILSGIk	1	Unigene21119_All	0.838117	6	0.781012	7	53.81	2	1902.19	-4.25582	66.5578
iALTDNAIIEQTLGk	1	Unigene2570_All	0.856053	1	0.864157	1	53.78	3	2208.3	-2.26998	78.4317
lMDLLTYPAVEEAIk	1	Unigene9731_All	0.990754	2	1.40319	2	53.78	3	2314.31	-3.88092	95.36
lANLALAGLTLAPLVVk	1	CL7437.Contig2_All	0.853559	3	0.877881	3	53.77	3	2285.47	-3.4445	103.174
fVEFYGGGVGk	1	Unigene18706_All	1.32274	6	1.458	6	53.76	2	1767.98	-3.9073	66.4642
aYLPVVESFGFSSTLR	1	CL1787.Contig1_All	1.05833	42	1.08275	42	53.76	2	2077.12	-1.97236	84.8404
vDDVANAALFLASDEAk	1	CL6189.Contig3_All	0.727104	1	0.830944	1	53.76	3	2357.28	-1.7188	84.7643
gILNVAAIk	1	CL4916.Contig1_All	0.831043	5	0.946393	5	53.74	2	1506.97	-5.80944	59.1202
aQAAIALSTGDASAIVSEELAR	1	Unigene4879_All	1.1518	1	1.05722	1	53.74	3	2448.33	3.72751	86.6652
iGVQIIQNALk	1	CL2530.Contig3_All	1.10948	6	1.24985	6	53.72	2	1805.14	-5.55242	75.6522
eVSDDVSDFLQLIk	1	CL1277.Contig5_All	1.04605	4	1.47157	4	53.72	3	2216.22	-3.3077	93.3679
aGDSTPEELATATQVSGPYLPIVR	1	CL1518.Contig2_All	0.807999	2	1.04224	2	53.72	3	2776.48	4.11258	72.9681
gVSLLLPTDVVIADk	1	CL2817.Contig2_All	0.956921	4	1.00307	4	53.71	3	2148.3	-2.41939	76.6055
lNAFIQGGY	1	Unigene4706_All	1.10765	5	1.00225	5	53.7	2	1286.7	-2.00305	75.1823
dATAALEINPDSAk	1	Unigene2767_All	1.08566	2	1.14236	2	53.7	2	2024.11	-0.459321	50.7398
aSQLFLNAIEVLk	1	CL5431.Contig1_All	0.885542	2	1.14192	2	53.7	3	2054.24	-1.33112	97.4593
lGIANEEGELLk	1	Unigene12207_All	1.14658	2	1.1585	2	53.69	2	1894.11	0.215517	62.8804
dTGVHGLVVPDVPLEETEILR	1	CL8980.Contig2_All	1.02179	2	1.09383	2	53.69	3	2592.42	0.142815	74.7182
kDEPEEEDDDDMGFSLFD	1	CL926.Contig1_All	0.904472	3	1.25638	3	53.69	3	2741.22	0.441466	72.1154
fGENVLDSTk	1	Unigene12609_All	1.026	2	1.20623	2	53.68	2	1717.95	-3.50844	54.0055
mLEGDLLELYk	1	Unigene3938_All	1.48239	21	0.927704	21	53.65	2	1932.1	-0.839838	81.7203
hIVTNTPTNLVPESR	1	Unigene13903_All	0.966429	4	0.629035	4	53.65	3	1982.1	-1.11771	47.2043
lTSLDQYISR	1	Unigene18800_All	1.22161	7	1.29948	7	53.61	3	1499.84	-0.868252	68.0735
iQGAQAIAAk	1	Unigene5274_All	0.942714	3	1.01198	3	53.61	2	1578.97	-3.9263	46.0853
vTYDDFLSGLVNk	1	CL3807.Contig2_All	1.0459	5	0.888098	5	53.59	2	2079.15	-3.76263	79.4275
vAVLGAAGGIGQPLALLVk	1	CL4342.Contig3_All	1.09766	4	1.03981	4	53.57	4	2355.48	-7.60011	87.0118
hAMVAAGSLVR	1	CL2736.Contig2_All	0.964608	1	0.855791	1	53.56	3	1415.8	-4.17346	43.0277
aMQEVFPNQSEVVVk	1	Unigene3116_All	1.18728	3	1.19655	3	53.54	3	2313.27	-0.867118	60.5479
nLHVLSQIEGVDLEMYk	1	Unigene21270_All	1.01603	2	1.09183	2	53.53	3	2596.43	0.0730349	78.3352
lQALAFHLTEk	1	CL2998.Contig2_All	1.22529	5	1.23587	5	53.52	2	1879.12	-5.665	75.38
aVDGIFHVLR	1	Unigene2735_All	0.918975	11	0.974299	11	53.49	3	1430.84	-1.56018	67.7992
iEDVTPIPTDSTR	1	CL6421.Contig1_All	0.91246	5	1.08285	5	53.48	2	1747.94	-1.09188	51.8809
dLVVSVMSAMGEEQINALk	1	Unigene9569_All	0.825147	2	0.812535	2	53.48	3	2642.44	1.81211	94.4592
vVEIVEALk	1	Unigene3340_All	1.07339	6	1.09041	6	53.45	2	1608.01	-4.04747	88.4528
vATILGNIEAEMVSEk	1	CL3965.Contig1_All	0.975246	1	1.29727	1	53.45	3	2312.3	-1.50578	100.706
nLQYYEISAk	1	Unigene3526_All	1.04416	10	1.10043	10	53.44	2	1837.03	-3.47149	54.2677
nQGAPEADDLNHWDTSFWSER	1	Unigene12609_All	1.23619	1	1.16008	1	53.44	3	2779.27	1.77073	72.4546
vVLVMESVADTLVEk	1	Unigene9558_All	0.735731	3	0.745076	3	53.4	3	2240.31	1.22844	111.659
tDDPHADDAVDPLEIYEYVR	1	CL2852.Contig1_All	1.04812	1	1.14416	1	53.39	3	2637.26	-2.04425	77.1969
sYGVLIPDQGIALR	1	CL5263.Contig2_All	1.01314	6	0.955574	6	53.38	3	1806.04	0.0490004	66.2006
gALETLVSALSPIEHAk	1	CL1097.Contig1_All	1.06174	3	1.05633	3	53.38	3	2344.36	-3.54852	89.2193
nYSGAELEGVVk	1	Unigene7720_All	0.93606	1	0.942831	1	53.37	2	1874.03	-7.01356	51.6697
qEQDQAAVDSHR	1	Unigene16507_All	0.892675	5	0.675849	5	53.35	3	1687.83	-2.41574	25.1197
lAEEASFFGDEVPAk	1	CL5693.Contig2_All	1.07986	1	1.17785	1	53.32	3	2218.17	-5.295	72.9201
tQLDEDPIVHR	1	Unigene14983_All	1.0393	5	0.912268	5	53.22	3	1626.87	-2.87772	42.4299
aLAGEkDEAFFSANAAAQASR	1	CL9612.Contig2_All	0.876807	40	0.920806	40	53.22	3	2733.43	-4.18534	62.5692
vLGSEELPVFALQDDR	1	Unigene1214_All	1.01142	3	0.954517	3	53.21	3	2092.12	-2.05384	78.5561
qLEPDWHIDSNPEIITQLAR	1	CL6016.Contig1_All	1.10827	1	0.899934	1	53.19	3	2679.38	-7.58865	75.001
eDISSFESGEIYNQADAAGFIR	1	CL9.Contig1_All	1.2002	3	1.02207	3	53.18	3	2723.31	-0.0280848	112.951
yVPFNAEPSSTESYSLDEIVYR	1	Unigene3156_All	0.956326	1	1.01963	1	53.18	3	2870.4	-0.0137922	76.324
sAIANADAIEPLIHVLETGSPEAk	1	Unigene5871_All	0.949712	1	0.902871	1	53.18	4	3054.69	0.564932	90.2305
iTYIAPAGQYSLk	1	Unigene18805_All	1.05325	9	1.08716	9	53.17	2	2033.18	-3.07025	61.933
fFDHAIGINVPR	1	Unigene9511_All	1.0378	15	1.00556	15	53.17	3	1689.94	1.60633	67.5317
lAEISNLLVLk	1	Unigene5574_All	1.03066	6	1.09013	6	53.15	2	1821.16	-2.64904	91.3315
qIPLSGPHSIVGR	1	CL9067.Contig2_All	1.21124	8	0.927045	8	53.12	3	1664.97	-2.25574	49.3943
qVLLGTIGDQVLALDk	1	Unigene5741_All	1.02576	5	1.05974	5	53.12	3	2291.37	-3.23685	89.3569
qFGYIVLTTSAGImDHEEAR	1	CL6010.Contig1_All	0.875946	10	0.976937	10	53.1	3	2558.28	-2.32487	112.97
lQLEHGLAVER	1	Unigene14724_All	1.0469	4	1.04779	4	53.09	3	1568.9	-1.98927	51.7944
eFGVQAMPTFLLLk	1	Unigene698_All	0.999504	3	1.16658	3	53.09	2	2202.28	-2.52042	86.7731
eGPALPVLDQMIQDGk	1	CL5278.Contig2_All	1.02123	3	1.32454	3	53.08	3	2319.27	-5.74245	78.6283
vSQMIEDAEPFEGEALLDAk	1	CL7335.Contig2_All	0.990161	4	0.995771	4	53.08	3	2800.44	-4.94918	87.3032
aEIEVIPVDYLNTAMER	1	Unigene7376_All	1.55507	5	3.11994	5	53.07	3	2267.19	-0.0864917	81.1421
vQEVVSEIFGk	1	CL5012.Contig2_All	0.990357	20	1.16863	20	53.05	3	1843.07	-2.53631	92.9063
lITYGTVMGGLLSEk	1	CL2443.Contig2_All	1.04661	1	1.0515	1	53.05	3	2190.26	-2.11726	86.7007
vADDLSPSIVFIDEIDAVGTk	1	CL1714.Contig1_All	0.917268	2	0.951679	2	53.02	3	2812.54	-3.06333	93.9707
dVDmVIEAVIENVSLk	1	Unigene9294_All	1.22578	5	1.62331	5	53.01	3	2398.33	-1.11292	107.776
nIVEQAAVR	1	CL1652.Contig1_All	0.920748	7	1.00331	7	52.98	3	1303.76	-0.864033	40.222
lNIHEYQGAELMSk	1	Unigene3116_All	1.08099	3	0.917952	3	52.96	3	2241.21	-1.69196	58.8043
nATNVEQAFMAMAADIk	1	CL6311.Contig2_All	1.06688	1	1.23613	1	52.96	3	2433.26	-4.4785	93.0098
iTSFLDPDGWk	1	Unigene902_All	1.12689	5	1.10146	5	52.95	2	1887.05	0.79084	82.4246
mFFPYTQAALLLVER	1	Unigene9294_All	0.946707	2	1.13431	2	52.94	3	2119.16	0.033484	91.4288
kPWEITGPVAHPEYR	1	Unigene5383_All	0.842269	4	0.86359	4	52.92	4	2388.32	-2.53856	54.3775
gLSPTDMVALSGSHTIGQAQcVTFR	1	Unigene349_All	1.37299	2	0.784614	2	52.9	3	2937.49	-0.384542	69.253
lLSHLGFSLPAEESDTLk	1	CL1375.Contig2_All	0.994026	3	0.957102	3	52.89	3	2565.44	-0.777546	80.7305
dALNSALDEEMSADPk	1	CL4460.Contig3_All	1.10246	2	1.29456	2	52.88	3	2314.15	-6.27529	61.8242
vFEINPEHPIIR	1	CL8749.Contig2_All	1.02889	3	1.16441	3	52.87	3	1767.99	-6.73	63.7456
sILWAADFELPk	1	Unigene4993_All	0.928938	1	0.937552	1	52.87	2	1998.15	-2.89442	82.0821
sSSYkPIYGDSTFcIDDIIPR	1	CL6223.Contig1_All	1.28024	1	0.822463	1	52.87	4	3042.55	-5.24668	77.8276
kVPQLIFScMGSDYLEGLAk	1	CL1381.Contig1_All	1.25581	1	1.05996	1	52.85	4	3168.76	-0.303409	86.5322
aLVDSPDMVR	1	Unigene14621_All	1.02022	5	0.987249	5	52.84	3	1406.76	-1.87419	45.7198
vGINEIAESmMAFNTNYk	1	CL9325.Contig2_All	1.1044	2	1.08906	2	52.83	3	2656.35	-4.20686	82.5885
sFAAVGVDPAImGVGPAVAIPAAVk	1	Unigene16507_All	1.07422	2	1.34901	2	52.82	3	2932.69	2.58957	73.364
hPELFESLGIAQPk	1	CL2430.Contig1_All	1.00583	5	1.08447	5	52.81	3	2174.24	-1.68257	65.3946
iVPGAAATEIELAk	1	Unigene11996_All	0.983365	3	1.16631	3	52.76	3	1991.19	-2.83014	64.3545
lISITSDINESLGDAk	1	CL661.Contig2_All	0.894777	3	1.0656	3	52.76	3	2284.28	-2.77561	83.109
qFPTENIWLTNEIIHNPTVNQR	1	CL1132.Contig4_All	0.776999	2	0.753572	2	52.75	3	2968.55	-1.70942	78.0031
tLLDALIPASSVVk	1	Unigene14724_All	0.973235	5	1.02249	5	52.74	2	2035.26	-2.92643	80.0757
eLLGGNGILADFLVAk	1	Unigene1236_All	0.872894	1	1.17504	1	52.74	3	2238.32	-4.78537	91.2704
lAVVWGAVSHLk	1	Unigene12609_All	1.05302	9	1.10477	9	52.74	3	1888.16	-3.21363	91.6811
sGPTTDTLADALAIAQHHDAVTGTEk	1	CL3416.Contig2_All	1.11776	1	1.25586	1	52.74	4	3228.69	-2.9651	71.2629
aGEVIALDFIESVIk	1	CL8378.Contig1_All	0.804817	3	1.16891	3	52.73	3	2212.29	-4.7157	111.487
lGEAGLDLLR	1	Unigene12447_All	0.970422	2	1.23794	2	52.71	3	1360.8	-5.15543	68.151
tFTPTQVLGmVLSDLk	1	CL1361.Contig1_All	0.949998	7	1.15529	7	52.71	3	2374.35	-2.53009	101.579
cDDVPAHEEVEk	1	CL6977.Contig1_All	1.06339	6	0.800518	8	52.7	4	2036.02	-0.729395	39.1226
vGFTDEFLQEMEPR	1	Unigene9906_All	0.939853	6	0.951691	6	52.69	3	2001.99	-2.15824	83.6502
yMAMMELEER	1	CL7993.Contig1_All	1.14152	10	1.04902	10	52.68	3	1606.75	-2.0385	70.0942
iLHPGDVFVFPk	1	CL1670.Contig1_All	1.72133	37	4.27134	34	52.68	2	1977.17	-5.03792	72.3135
fEDPAEGEEALVAk	1	Unigene18805_All	0.974098	7	0.988141	7	52.6	2	2113.12	-1.57126	60.0876
sALASIIMGMAPILGk	1	Unigene14685_All	0.876172	3	1.01727	3	52.57	3	2181.29	-2.16266	104.489
fLIAGGGAPEIELSR	1	Unigene5496_All	1.15656	5	0.98522	5	52.56	3	1834.03	-1.71877	70.7328
dADIGALHLIPk	1	CL2542.Contig3_All	1.11617	3	1.82034	3	52.55	3	1871.12	-2.85631	63.1823
ySGMGAAIEYAVLHLk	1	Unigene10133_All	1.43817	3	1.0889	3	52.55	4	2331.29	-3.11007	94.0006
gGTDSIISLTLYDADGYGIR	1	Unigene7419_All	1.22595	6	0.995384	6	52.54	3	2391.24	0.208779	83.784
lVSWYDNEWGYSSR	1	Unigene18792_All	1.25254	11	1.43037	11	52.53	2	2065.99	-1.48599	80.5623
lHEHAVPFDPLVADIER	1	CL9218.Contig1_All	0.822444	4	0.909103	4	52.53	3	2262.21	-2.70348	67.3263
fTPLLNHLGR	1	Unigene14612_All	1.11093	2	0.956902	2	52.52	3	1471.87	-1.40603	64.6419
iFTNVYGLHDPFLk	1	Unigene18842_All	1.21357	7	1.04502	7	52.47	3	2272.29	-3.28327	81.8282
eIQAWYVLSk	1	Unigene14384_All	1.12419	8	1.19079	8	52.46	2	1845.06	-6.02909	73.8928
tSIPDVYAVGDVATFPLk	1	CL2567.Contig2_All	1.08314	13	1.27253	13	52.43	2	2501.41	-0.10995	76.176
iFDVNPDILR	1	Unigene21119_All	0.905145	8	0.851407	8	52.42	3	1505.86	-4.1692	74.9846
iIVEYIDEVWk	1	CL1849.Contig1_All	1.03281	11	1.12549	11	52.39	3	2015.17	-0.716364	99.5236
vEQGIIkPGEEVEILGLSQNk	1	CL2355.Contig1_All	1.17566	1	1.50351	1	52.38	3	3192.86	-1.08942	73.6651
dMSEHDIYDGR	1	Unigene5219_All	1.13057	4	1.04599	4	52.36	3	1641.75	-1.85293	38.1321
nEQGGNSVSTVVLR	1	Unigene11996_All	1.2052	2	0.964735	2	52.36	3	1763.95	-1.18488	40.3095
vVELLDGLcEk	1	Unigene21706_All	1.08419	2	1.09533	2	52.35	3	1883.07	-2.6785	86.3032
fQSVVAFVPTTSTVLSPEVVER	1	CL194.Contig3_All	1.12788	1	1.01701	1	52.33	3	2696.47	-2.74811	83.6216
sHVFSSDDNALTk	1	CL3753.Contig2_All	1.32554	4	1.29863	4	52.33	3	2029.07	-5.97735	44.5862
iEVIDDAAk	1	CL6066.Contig1_All	1.00322	21	0.72603	21	52.31	3	1581.92	-4.36683	56.1911
eAFSQYGEVVEAR	1	Unigene912_All	1.18123	4	1.09886	4	52.31	2	1788.9	-2.65639	56.4199
gVPDLTMVDLPGITR	1	CL3408.Contig1_All	1.89837	1	1.93948	1	52.31	2	1888.05	-0.22046	75.3551
qMQEIYGASGYFLDSk	1	Unigene14829_All	1.04223	1	1.1052	1	52.31	3	2445.26	1.38489	75.4879
hSLEFINIFTDDGk	1	Unigene661_All	0.891881	3	1.10166	3	52.3	3	2244.2	-3.79418	77.4752
nEIVYQMTQVLMEk	1	CL4625.Contig2_All	1.1369	2	1.3932	2	52.29	3	2334.25	-5.86567	92.1794
vVIGmDVAASEFYGSDk	1	CL7728.Contig1_All	1.02221	3	1.28942	4	52.29	3	2412.25	-2.9482	66.8908
eAGVTVVESPAk	1	CL3225.Contig1_All	1.37367	2	1.22537	2	52.28	2	1795.04	-1.30291	41.5747
aLGFGEVSLLNPILVHck	1	Unigene16215_All	1.10613	2	0.905773	2	52.28	3	2575.49	-1.32185	83.3678
lANLIAFDVESkPENR	1	CL7643.Contig3_All	0.980046	5	1.1546	5	52.26	3	2424.36	-2.48811	79.9821
gNDVNLGIYk	1	CL4944.Contig1_All	1.21149	4	1.10419	4	52.25	2	1700.97	-4.29869	50.6187
sILSDILGMMSAk	1	Unigene21218_All	0.956438	2	1.03334	2	52.25	3	1974.12	-3.13873	105.778
lAMQEFmILPVGAASFk	1	CL7728.Contig1_All	0.996919	13	1.14389	13	52.23	3	2477.37	-1.24023	83.1903
lADFGVLHR	1	Unigene7485_All	0.964531	3	1.01998	3	52.21	3	1331.77	-1.44739	60.4536
gLQQYLVQLQQHPLR	1	Unigene16561_All	1.01305	3	1.08267	3	52.21	3	2125.22	-1.2224	75.8324
gNVQPEAVLQTVSk	1	Unigene594_All	0.764582	4	0.893164	4	52.2	2	2078.2	-2.01189	57.1451
qTEGSQNSLEIEELAR	1	CL5162.Contig1_All	1.39271	1	1.05847	1	52.19	2	2108.07	-1.23177	54.6971
nVIHGSDAVESAR	1	CL4344.Contig1_All	0.900787	9	0.664642	9	52.17	3	1658.87	-2.21625	34.796
vLVTPTSDLGk	1	Unigene7626_All	1.09128	4	1.14078	4	52.16	2	1738.05	-2.54963	51.6064
aVNFYDELGk	1	Unigene9992_All	0.992492	4	1.07223	4	52.16	2	1763.97	-3.19686	64.5829
aSIYNAMPLAGVEk	1	Unigene14427_All	0.905311	3	0.993298	3	52.13	2	2072.17	3.04808	64.3713
dLVQTGGLNELIVELQTk	1	CL3329.Contig2_All	0.855545	1	1.0327	1	52.13	3	2578.49	-1.52123	89.4293
qDQVDDEELLQLVELEVR	1	CL4265.Contig1_All	1.27649	2	1.05031	2	52.12	3	2474.29	-1.93682	94.3533
iVLTILGDEVDEk	1	Unigene2959_All	0.968054	4	1.09597	4	52.11	3	2052.2	-4.03125	89.3658
vLLNAVGDDLVINNSk	1	CL7974.Contig1_All	0.668048	1	0.686499	1	52.11	3	2292.33	-4.24628	74.2387
vDEYITHNSTLADINk	1	CL2799.Contig1_All	1.20992	3	0.889262	3	52.08	3	2441.31	0.702187	62.9257
qAMDDGVNLk	1	CL3477.Contig5_All	0.739163	6	0.725892	6	52.07	2	1698.92	-8.15091	44.2045
vFEIGPVFR	1	CL4610.Contig2_All	1.00138	5	1.21828	5	52.06	3	1367.8	-0.928299	73.202
lSELLGIQVVk	1	CL2817.Contig2_All	0.945755	2	0.913618	2	52.06	3	1807.15	-3.03471	83.3223
lVQGDALk	1	Unigene9511_All	1.15219	5	1.08692	5	52.05	3	1451.9	-3.65893	43.4414
dGAIDATLDHAk	1	CL8617.Contig3_All	0.983435	7	0.891698	7	52.04	2	1835.01	-0.694047	48.813
yEHLNIDAEAYGASR	1	CL745.Contig1_All	0.844804	16	1.18755	16	52.04	4	2317.2	-3.07423	52.198
tSVLLLQEAAPHLQk	1	CL1113.Contig2_All	1.04878	5	1.05105	5	52.03	3	2256.34	-4.98194	68.714
aAMLAGVNELAEAVk	1	Unigene14120_All	1.06619	5	1.12539	5	52.02	3	2095.2	-3.64832	83.595
vTNPTLSPSHLQDLPGFTR	1	CL6028.Contig2_All	1.06622	2	0.970018	2	52.02	3	2384.28	-3.80984	64.9767
qLSDYIVPALVEALHk	1	Unigene1079_All	0.837581	7	0.933497	7	52.02	3	2404.4	-2.97472	94.0576
eLFSGENILGLR	1	CL1046.Contig1_All	0.908758	2	0.983472	2	51.99	3	1651.93	1.09676	75.7875
eVEDSELADVAAVSAGNNYEVGNMIAEALSk	1	CL8517.Contig2_All	1.1969	1	1.31935	1	51.97	4	3803.9	-2.09013	99.9838
eQMTPLSDFEDkL	1	CL1787.Contig1_All	1.03993	8	1.25182	8	51.93	3	2161.12	-4.02933	76.2926
tLDTAHHDDFHQPNYPGAAITk	1	CL2542.Contig2_All	0.955613	4	0.809263	4	51.92	3	3057.56	-2.26696	48.7351
wGGVLLELSQFQNGPDSk	1	Unigene19148_All	1.16823	1	1.35237	1	51.91	3	2583.4	0.718007	95.2525
fVMDGEMPDYLLAk	1	CL1436.Contig1_All	0.977287	3	1.25949	3	51.9	3	2237.17	-6.59924	79.4682
aALQEAYSTAILPLDILADRPPEk	1	CL3015.Contig2_All	1.04118	4	1.06271	4	51.9	4	3203.81	0.206148	92.1781
lGLEGAAVVISSR	1	CL1113.Contig2_All	1.05966	4	1.29298	4	51.89	3	1575.94	1.09564	64.1757
fSELTMAHR	1	CL168.Contig1_All	1.05357	8	0.839352	8	51.88	3	1395.74	-0.430797	51.6341
vMSPTESFIHSLDEk	1	CL1709.Contig1_All	1.11811	4	1.02583	4	51.87	3	2328.23	-2.62362	73.8689
hNILPDVEmIPIDYVNTAMER	1	CL2602.Contig2_All	1.04927	12	1.20198	12	51.86	3	2790.4	-2.30547	84.0867
aMAAEIEVVDGPNDEGEmFTRPGk	1	Unigene2532_All	1.05116	2	1.12066	2	51.85	4	3187.58	-0.470848	65.9787
nFTEAVADANk	1	CL7957.Contig1_All	1.11823	2	1.25926	2	51.84	2	1787.97	-0.0919064	48.7568
dYEMDAIHSLQLILR	1	Unigene16215_All	1.08125	3	0.890989	3	51.84	3	2121.13	-1.47004	92.8024
gIDVVLNDESk	1	CL1361.Contig1_All	1.02807	2	1.08563	2	51.83	2	1797.01	-5.45184	54.8326
lLILDHLDR	1	CL2036.Contig1_All	0.748138	4	0.649924	4	51.81	3	1411.85	-2.07135	72.0131
vITDHLGLGVk	1	CL1519.Contig5_All	0.914313	6	0.802279	6	51.8	2	1760.08	-3.13486	57.4305
eDVVIQFINPk	1	CL4175.Contig1_All	1.11192	10	1.17471	10	51.8	3	1910.12	-2.90758	74.3861
hILATVLSSNDVVQAk	1	CL1855.Contig2_All	1.15416	2	1.08853	2	51.8	3	2303.35	-2.54735	67.3922
eREELVYLAR	1	Unigene13904_All	1.01959	6	1.18233	6	51.79	3	1581.9	4.27683	50.1127
tEDELLEAIAmATSTHk	1	CL1523.Contig2_All	1.35383	2	1.15193	2	51.75	4	2484.31	-1.50162	85.1866
iEIHTFNQSQYPR	1	Unigene9511_All	0.964036	8	0.970875	8	51.74	3	1937.02	-1.38521	51.4909
nPAYPDTLYVAPLVGPDTVSTmPDQALQAFIDHGSVAR	1	Unigene13923_All	1.03773	1	1.82142	1	51.72	4	4347.2	1.23885	89.2088
tEDELVEAIATATGTHk	1	CL1523.Contig1_All	1.00332	2	0.825224	2	51.71	3	2394.3	1.92655	81.8902
hPDIVEFVHk	1	CL7095.Contig3_All	0.809516	5	0.845357	5	51.71	3	1829.05	-3.43089	52.3848
lDHGVLLVGYGESGYAPIR	1	CL2028.Contig2_All	0.958917	2	1.09875	2	51.7	3	2320.26	-0.654274	67.9129
aATNNFDEALLLGVGGFGk	1	Unigene2803_All	1.04276	1	0.846145	1	51.69	3	2502.39	1.70315	84.5809
nGVEAVIGSELQGLTEYEQk	1	CL4342.Contig3_All	0.870566	1	1.07718	1	51.68	3	2772.5	2.69036	88.6652
eHGAPDDEHR	1	CL9067.Contig2_All	0.87406	4	0.661119	4	51.67	4	1466.69	-1.38327	18.5524
vPDGFDYELYNR	1	Unigene11461_All	1.05556	10	0.818153	10	51.66	3	1791.88	-1.46975	63.6792
lLVFEDLDVPSHk	1	CL4428.Contig1_All	1.01383	3	1.04838	3	51.66	3	2120.22	1.12942	80.2299
tYGQIADETGLTNVYVAQLLR	1	Unigene14263_All	0.960213	2	1.14637	2	51.66	3	2629.41	0.337632	86.8804
tSAcASVVDTLLSTSTAVk	1	CL4403.Contig1_All	1.14835	1	1.08986	1	51.65	3	2519.39	2.39976	78.6116
fADENFVLR	1	CL8523.Contig1_All	0.969871	2	0.91137	2	51.62	3	1414.76	-3.73391	61.6258
eLFAEVGDLk	1	Unigene20942_All	1.03493	5	1.16237	5	51.62	3	1729	0.911688	71.0247
lTPDYDALDVANk	1	Unigene20771_All	0.918908	5	1.14704	5	51.62	3	2043.12	-1.41432	59.8322
sQAESIFNLLk	1	Unigene1079_All	0.905405	4	1.02162	4	51.61	3	1858.08	-3.74507	79.8492
lVSQLLEHAQGQTAR	1	CL6716.Contig2_All	1.04025	8	1.1054	8	51.61	3	1955.1	2.90744	73.8918
kVAILGAAGGIGQPLSLLMk	1	CL1695.Contig2_All	1.33244	1	0.872773	1	51.61	4	2849.77	-2.08789	86.2254
qIATLEHAPAFMFR	1	CL1950.Contig2_All	1.80692	8	0.864395	8	51.6	3	1936.04	-0.777884	73.112
gHAVGDIPGVR	1	CL3689.Contig2_All	0.953032	3	0.950382	3	51.6	3	1381.78	-1.09507	37.1987
vYDVTPFmDDHPGGDEVLLSATGk	1	Unigene12009_All	0.988361	2	1.79027	2	51.59	3	3187.61	-0.642558	71.7053
dIQDISLNLk	1	CL7708.Contig1_All	1.20689	2	1.243	2	51.58	2	1767.04	-1.29132	63.4832
mSAVVEYVFSGHR	1	Unigene3223_All	1.03458	7	1.1173	7	51.56	3	1785.92	-1.35739	89.0044
aLEDAVAVLDk	1	Unigene19094_All	0.911231	9	1.02735	9	51.55	2	1752.04	-0.108953	75.8134
vkDFGLPVVLLNAAk	1	Unigene14949_All	1.13422	4	1.35135	4	51.55	3	2496.56	-2.62509	82.1377
dAAVLMVNYIDEIR	1	Unigene18973_All	1.06323	3	1.04311	3	51.54	3	1926.03	1.93078	89.7238
gETEGLLQLPTDk	1	CL1920.Contig2_All	1.07052	8	1.27413	8	51.54	2	2009.13	-1.35784	59.8415
eAFPGDVFyLHSR	1	Unigene115_All	0.874041	37	1.03909	37	51.54	2	2146.15	-2.31288	62.5028
kSQYLDDIAILTGGTVIR	1	CL8517.Contig2_All	0.964583	2	1.1376	2	51.54	3	2571.5	1.02292	83.6543
dDNPIGATLIGR	1	Unigene8848_All	1.16486	11	1.00444	11	51.53	2	1545.85	-2.41035	53.808
iGGASEAEVGEk	1	CL2530.Contig3_All	1.08229	4	1.03505	4	51.51	2	1754.96	-5.68454	40.5211
dINLYENPLAIASFGAR	1	CL85.Contig11_All	1.04329	3	1.05067	3	51.51	2	2168.17	2.67916	80.4658
tLIDAMEAADVk	1	Unigene4960_All	0.831811	4	0.973342	4	51.48	3	1885.05	-1.75154	70.4108
gHFGPINALAFNPDGR	1	CL5631.Contig1_All	0.954416	2	1.19573	2	51.46	2	1987.04	-2.45616	64.207
lWDLATGATAR	1	CL1892.Contig1_All	1.00942	8	1.09359	8	51.44	3	1478.82	-2.58859	72.1274
aSQEQDDSAVSk	1	CL6393.Contig1_All	1.17487	1	0.936575	1	51.44	3	1872.97	-3.33247	29.6677
vYFGGDSAGGNIAHNMAMR	1	Unigene12333_All	1.44956	1	1.19686	1	51.44	3	2272.09	-0.641196	59.7852
hIPVINEGGmIGMVSIGDVVR	1	Unigene4706_All	1.18647	4	0.934449	4	51.44	3	2513.36	1.55489	73.215
dQADYISVPIEGPYkPPHYR	1	Unigene5567_All	0.701879	8	0.778942	8	51.42	3	2953.56	-1.63038	60.229
gTGIVTSVPSDSPDDYMALHDLk	1	Unigene16996_All	1.02195	2	0.87562	2	51.4	3	3026.56	1.14701	66.8347
lLLGLEDHAR	1	CL1771.Contig3_All	0.897482	3	1.17415	3	51.39	3	1440.84	-2.59922	64.5386
gELVSDDLVVGIIDEALk	1	CL2847.Contig2_All	0.934693	6	1.12305	6	51.39	3	2493.42	-3.13367	105.442
hSIIGASGELSDFQEImR	1	CL4952.Contig2_All	0.937279	2	0.823757	2	51.38	3	2310.16	-2.44198	63.0311
mTLADDVNLEEFVMTk	1	CL1714.Contig1_All	1.07275	2	1.083	2	51.38	3	2464.29	-2.79379	87.0385
eDLAALEkDYEEVGAESAEGEDDENDEY	1	Unigene9258_All	0.226843	1	0.219486	1	51.36	3	3742.67	-0.952148	80.4281
vSLEDLYLGTTk	1	CL3143.Contig1_All	1.17153	4	1.37009	4	51.35	2	1947.12	-2.1887	70.7948
tAAYISQHDLHIGEMTVR	1	CL745.Contig1_All	1.1309	4	1.02763	4	51.35	4	2346.21	-1.5204	62.1897
gYISPYFVTDSEk	1	CL8517.Contig2_All	0.851583	4	1.07155	4	51.34	2	2114.12	-2.93378	61.416
vEGLETLDYLDNLQNR	1	Unigene14944_All	1.10266	4	1.05435	4	51.34	3	2196.14	-0.767983	79.86
dHNkPVQEVIAEMTDGGVDR	1	CL6693.Contig23_All	0.962262	5	1.25441	5	51.33	3	2818.45	-3.09723	71.29
vGVQIIQNALk	1	CL2530.Contig1_All	0.934955	6	0.979509	6	51.32	2	1791.13	-1.35642	70.2953
iPVITTVAGALATAEAIk	1	Unigene1084_All	1.15657	3	1.09724	3	51.3	3	2347.43	-5.00047	99.7221
iFNTNNLWVNLk	1	Unigene9511_All	1.20052	8	1.09841	8	51.28	2	2084.21	1.37108	82.169
fAIVVAR	1	Unigene10098_All	0.943608	3	0.768672	3	51.26	3	1079.69	-1.63099	53.4041
tFPLLSLLDk	1	CL9612.Contig2_All	0.770374	35	0.911301	35	51.25	2	1755.08	-4.22403	91.0863
kGVEADNIEEMYk	1	CL2741.Contig2_All	1.11235	2	1.10194	2	51.23	3	2438.32	-7.3767	55.4452
vTALVNDTVGTLAGGR	1	CL2941.Contig2_All	0.913528	5	0.897843	5	51.22	3	1848.05	-1.91652	84.0179
vLVDGFEIAk	1	CL8683.Contig2_All	1.04088	5	1.17249	5	51.21	3	1699.02	-3.4921	69.0891
iATVLmYLTDVEk	1	Unigene8064_All	0.921288	1	1.20416	1	51.2	3	2120.2	-6.21539	102.95
vYINSAVLkPLYEALmk	1	CL9222.Contig1_All	2.743	21	1.25849	21	51.19	5	2880.7	-1.60532	91.0045
dNLTLWTSDLPEEGGEQSk	1	Unigene13904_All	0.976224	1	0.924186	1	51.17	3	2727.4	1.70239	68.8435
fLGSSEFAADk	1	Unigene5219_All	1.20887	3	1.11952	3	51.16	2	1779.97	-2.72006	60.2352
hAVELEQSFMEGAYNR	1	CL1940.Contig1_All	0.817879	1	0.989116	1	51.14	3	2185.06	-1.97166	65.8981
nIDQVLLEFk	1	Unigene16722_All	0.957714	5	0.973462	5	51.13	3	1827.08	-3.10072	81.9387
hIANLAGNk	1	CL7728.Contig1_All	1.03122	9	1.16409	9	51.11	4	1545.92	-4.73885	38.8868
sLVELGYEVTTIQGALk	1	Unigene16822_All	1.03369	3	1.13007	3	51.09	3	2429.41	-0.642219	89.9814
gLDYEYIAVDLLk	1	CL6440.Contig2_All	1.17282	3	1.09132	3	51.07	2	2120.21	-0.668617	87.2236
tSIPGIFAIGDVAAFPLk	1	CL2334.Contig1_All	1.06232	5	1.02064	5	51.05	3	2425.43	-2.52414	89.9459
aALSDEYFVk	1	Unigene14874_All	1.29617	2	1.46203	2	51.03	2	1750.98	-3.98132	58.0523
eAFPGDVFYLHSR	1	Unigene115_All	1.07067	14	1.07766	14	51.03	3	1841.95	0.532544	66.2045
nTYEEAIAGLEk	1	Unigene10133_All	1.06576	3	1.02024	3	51.03	3	1946.06	-5.01063	64.5434
rmDVDLTDVELNER	1	Unigene21026_All	1.07314	1	1.00844	1	51.03	3	2025.02	-2.0803	50.821
lLEFLDVAAk	1	CL567.Contig4_All	0.991984	4	1.08906	4	51.02	2	1727.05	-3.2092	92.9125
sPEYYLGLTSLk	1	CL6223.Contig1_All	1.13055	5	0.866547	5	51	3	1979.13	-2.03881	72.8005
lTTFEIAASTNEAISGGk	1	Unigene21403_All	1.03302	13	1.07894	13	50.99	3	2418.33	-0.495652	73.3855
hAQPGGALQDVLHLNDVLAR	1	Unigene9483_All	0.802186	6	0.881247	6	50.99	4	2428.33	-1.0041	75.1683
vHLGDTPHNLTESDFEVLGR	1	CL6830.Contig1_All	0.896219	2	0.934763	2	50.99	3	2540.3	-1.2331	64.2255
eNPTYSLQTVEEIMk	1	CL9465.Contig1_All	1.00565	4	0.944848	4	50.98	3	2390.26	-4.04778	77.3497
sMAQAQDcLLPMGITSENVAHR	1	Unigene16507_All	0.739049	1	0.846255	1	50.98	3	2733.33	-3.52553	64.3013
aPALDHTLTLFHEIk	1	Unigene7866_All	1.04821	13	0.786633	13	50.98	3	2314.33	-3.26394	76.1214
vMPAVIVR	1	CL2630.Contig2_All	0.958813	7	0.955344	7	50.96	3	1188.74	-2.86569	49.3471
aFGETLNER	1	Unigene7025_All	0.804819	7	0.702626	7	50.92	3	1340.71	-1.56725	43.7483
fFEEISQDTGk	1	CL566.Contig2_All	1.02785	5	1.07899	5	50.92	3	1909.01	-4.10331	73.4502
eFPWGPDGLFEVk	1	CL2644.Contig3_All	1.19475	3	1.126	3	50.92	2	2129.15	-2.03189	82.4787
nVLAIAVETDYSFPQADk	1	CL926.Contig1_All	0.922727	11	0.938753	11	50.92	3	2589.39	-3.19315	113.205
eIFEDSFSPAIDAALR	1	CL6693.Contig4_All	1.18892	3	1.1039	3	50.91	2	2085.07	-3.88664	81.4495
gMTGLLWETSLLDPEEGIR	1	CL8544.Contig1_All	1.05681	2	1.28889	2	50.91	3	2421.25	-4.07677	90.1009
yVSGSYDAPEGFQALDk	1	CL1277.Contig6_All	1.02861	2	1.40532	2	50.91	3	2455.25	-3.83045	63.4534
tYNPAADSILGLTESLSk	1	CL114.Contig5_All	1.131	1	1.21609	1	50.91	3	2488.38	0.924486	82.5974
kYEVPVDIEVLDmLDTGAR	1	CL2143.Contig1_All	1.08061	7	1.16939	7	50.91	3	2787.5	-2.31801	79.6408
yVQLPPEGVDVELLHDATR	1	Unigene701_All	0.878272	2	0.909962	2	50.91	4	2759.51	-2.62869	71.3409
aLLLLLVGAPHR	1	Unigene20528_All	0.886372	2	0.895212	2	50.9	3	1577.02	-2.05149	88.3759
iHGEDILEDALTFTTSNLk	1	Unigene18757_All	1.05985	3	4.01114	3	50.9	3	2725.47	-4.67664	91.7138
eAVDLETIPIAEVLENLR	1	CL77.Contig8_All	0.932534	1	0.997579	1	50.89	3	2328.3	-0.419172	100.973
mIPTkPmVVETFAEYPPLGR	1	CL116.Contig9_All	1.02182	12	1.38702	12	50.88	4	2900.58	-2.0943	76.3438
lTHVYTAILkPDNELR	1	Unigene3051_All	1.54754	9	1.36479	9	50.86	3	2491.44	-3.77162	65.152
vEAPVVVITGASR	1	CL3272.Contig2_All	1.08217	5	1.08606	5	50.85	3	1601.95	-3.28122	55.8209
yLQQLVMESLGk	1	Unigene9906_All	0.928979	8	0.938077	8	50.85	3	2017.16	-2.45749	91.4409
vVPASEIPDGWmGLDIGPDSIk	1	CL3885.Contig1_All	1.06646	2	1.00396	2	50.84	4	2920.56	1.42117	78.4913
vVEDENAIGGGYQk	1	Unigene5383_All	1.10278	2	1.20303	2	50.82	3	2087.12	-2.39432	49.1412
eVVELPMLHPEk	1	CL3223.Contig1_All	1.03075	5	0.936869	5	50.81	3	2029.15	-3.53567	63.3267
lGSQLDIIAPIk	1	Unigene7387_All	0.85388	3	1.0444	3	50.8	2	1876.16	-4.56737	68.7821
vSEADVIR	1	CL9325.Contig2_All	0.997271	2	1.07569	2	50.79	3	1192.68	-3.4784	40.7592
fAPLDAVHVMER	1	CL2069.Contig1_All	0.966623	2	0.826604	2	50.79	3	1688.91	-1.79523	66.2804
kDEAAELESLISGYR	1	CL3167.Contig3_All	1.06603	1	1.1735	1	50.78	3	2289.25	-4.17166	80.7997
aEAIMALAEVGR	1	Unigene11450_All	1.15132	7	0.964744	7	50.77	3	1534.86	0.682016	81.0286
lTLHGLVQHYIk	1	Unigene18266_All	0.859829	8	0.932066	8	50.75	2	2030.23	-3.00294	66.9254
dAILGVGGPAPILVSEGANTmDVGR	1	CL7712.Contig1_All	1.03863	1	1.06109	1	50.74	3	2729.44	-0.68993	70.4068
aSYENNNYIQTIVNDDWk	1	CL439.Contig4_All	0.899226	3	0.966215	3	50.73	3	2795.39	-5.4511	76.9659
dIAAEAVk	1	CL3900.Contig1_All	1.00543	6	1.11891	6	50.72	3	1424.85	-4.60073	40.394
vVIDHGAVPIFVR	1	CL6870.Contig4_All	0.904985	3	0.847844	3	50.68	4	1726.03	-1.28594	62.7893
vQEVVAEIFGk	1	CL5012.Contig3_All	0.93368	5	1.63853	5	50.68	3	1827.08	-2.90576	97.3597
gGLELNDSATVADLQEAIHk	1	Unigene21700_All	0.97885	2	0.931364	2	50.68	3	2689.46	-0.0212778	73.5142
gEDFPTQHYIVk	1	CL8480.Contig1_All	1.2804	11	1.1654	11	50.66	2	2042.11	-1.30259	51.8233
aSSGDLDNTAIIDQILk	1	Unigene12609_All	1.08416	3	1.26915	3	50.65	3	2382.33	-2.96266	76.3811
yLSSVLFDSVR	1	Unigene7518_All	1.10451	11	1.29859	11	50.61	3	1589.88	0.221567	78.1307
dSVVILGGPDWNVk	1	Unigene2890_All	1.24332	3	0.992831	3	50.61	2	2107.19	-3.40272	67.1359
eYLPIVGLADFNk	1	CL5212.Contig1_All	0.948137	6	1.07708	6	50.6	3	2087.19	-2.86584	80.4298
aPGFAHLQGLDFMSk	1	CL123.Contig1_All	0.98574	6	0.846831	6	50.59	3	2227.21	-2.71486	72.9601
eLDDVIIPPSPVLYPDDHETWNVQLFR	1	CL2542.Contig2_All	1.28574	2	1.1663	2	50.57	3	3511.81	0.993117	87.0115
fQTENLETNk	1	CL1269.Contig1_All	1.34607	2	1.05513	2	50.56	2	1831.99	-3.33006	45.3312
lPSkPLPPAQAVIESR	1	CL3628.Contig1_All	0.97166	5	0.945293	5	50.54	4	2311.39	-1.77251	57.1727
dIQAWEYVPLGPFLGk	1	Unigene16624_All	1.296	1	0.957576	1	50.54	3	2441.36	-2.38351	90.0778
aALEPTDLVEVFFk	1	Unigene16617_All	0.921744	5	1.16737	5	50.53	3	2187.25	-3.13493	93.3663
aSLEALEGR	1	Unigene7025_All	1.00191	5	0.77968	5	50.5	3	1249.7	-1.7453	48.7233
aILLDFPAITVkPAAA	1	CL2078.Contig4_All	1.02657	5	0.782573	5	50.5	3	2219.36	-2.31976	82.6621
eNYELGLPVIEk	1	CL5278.Contig1_All	1.15284	1	1.78701	1	50.49	2	2012.16	1.36553	64.4601
iADVLLLMEk	1	Unigene3662_All	1.12303	5	1.0512	5	50.48	2	1753.07	-2.45785	96.6734
iQLGQGSAADVTk	1	Unigene635_All	0.837608	3	0.9138	3	50.48	2	1896.1	-2.43034	47.8093
fLVLNAAELSVTPk	1	Unigene14489_All	1.04716	6	1.0913	6	50.48	2	2110.27	-0.00490073	80.3984
aNPLATVLSAAMLLk	1	Unigene20843_All	1.08149	6	1.25012	6	50.45	3	2121.29	-2.7837	104.898
gGVFTPGIVFGPTDLEk	1	CL8744.Contig1_All	0.87239	1	0.951402	1	50.45	3	2342.32	0.185872	75.5853
lNDHFPLVVWQTGSGTQSNMNANEVIANR	1	CL1746.Contig1_All	0.984366	1	0.957763	1	50.45	4	3516.75	-1.73756	75.1853
iWTQFLDESTEGLR	1	Unigene14489_All	0.967806	2	0.909173	2	50.44	2	1999.05	3.11904	89.5761
iSFMDEVAAVSAASTAIGER	1	CL4478.Contig1_All	0.940693	1	0.920393	1	50.44	3	2329.2	-0.028468	91.9759
sLLFQIEYPEIEDNTkPR	1	Unigene21377_All	0.919812	2	0.959121	2	50.42	3	2800.53	-2.34215	75.5496
aDRDESSPYAAmLAAQDVSQR	1	CL6421.Contig1_All	0.989193	4	0.874816	4	50.41	3	2601.24	-3.58734	50.4751
iVPTDEENIADAISLATEEIAGIGk	1	CL3408.Contig1_All	1.6126	2	2.46801	2	50.41	4	3177.73	-2.74415	110.623
iADAEENLGESEVR	1	Unigene16874_All	1.18059	3	1.20915	3	50.39	2	1835.93	-1.93948	54.4529
aFVVHELEDDLGk	1	Unigene338_All	1.13325	22	1.08245	22	50.38	2	2080.15	-1.01748	81.6371
hVELYDVVSNR	1	CL2428.Contig6_All	1.30946	2	0.862461	2	50.37	3	1634.88	-0.103469	51.4186
aVVVIADVMGNk	1	CL2946.Contig3_All	1.07697	10	1.15366	10	50.37	2	1824.09	0.0431133	83.5407
aVQEEDELPPEk	1	CL2724.Contig1_All	1.15849	2	1.21493	2	50.37	2	1992.07	-2.56301	43.8586
eEFHAILEEEELk	1	Unigene178_All	0.866105	4	0.931425	4	50.37	3	2224.18	-5.74312	68.0736
fDDGVGGDNEVQR	1	CL3223.Contig1_All	0.988949	2	1.00714	2	50.36	2	1711.82	-2.02943	40.3457
lIAPAVQALAQEYEDk	1	Unigene12162_All	0.98725	1	1.14643	1	50.36	3	2367.34	2.68368	88.7648
eYVIAGWAPk	1	Unigene7837_All	1.15814	5	1.11161	5	50.33	2	1742.02	3.82529	64.6955
iNGVPIELVQPEILR	1	CL7250.Contig1_All	0.998797	4	1.17942	4	50.32	3	1994.19	-0.829743	77.332
lAYIALDYEQEMETAk	1	CL937.Contig13_All	0.903267	7	0.924705	7	50.32	3	2496.3	-4.82935	87.1376
sISSGFGVLLk	1	Unigene16483_All	1.06165	5	1.06653	5	50.3	2	1716.05	-1.16731	67.6969
vVIADVQDELGQALSDk	1	CL9650.Contig1_All	1.13621	1	1.97082	1	50.29	4	2408.34	-4.59809	89.0582
dAQALFHSLR	1	CL9048.Contig2_All	0.894835	3	1.07331	3	50.28	3	1461.81	-1.81845	58.7243
lLVLEAADQLDR	1	Unigene14495_All	1.16247	4	1.14444	4	50.27	3	1659.96	-0.437711	81.8833
lEALLQEPLLk	1	Unigene14113_All	0.949481	6	1.27471	6	50.27	2	1875.18	-1.11385	86.9905
mGDPSVEVSEENR	1	Unigene2767_All	1.28838	1	1.05347	1	50.26	2	1752.83	-2.47699	40.3927
vNVDEVASLVk	1	CL2753.Contig3_All	0.883099	2	0.965459	2	50.26	2	1781.06	-2.60304	66.7041
wQHDFLVVNk	1	CL6846.Contig3_All	0.917071	3	1.03108	3	50.25	2	1894.07	-3.56364	62.811
eDFIHHAEAEVAR	1	Unigene18974_All	0.713588	9	0.810122	9	50.24	2	1827.93	2.18376	59.2016
dEALDHLGADDYVVSSDGAR	1	Unigene19164_All	1.11694	1	1.11914	1	50.22	3	2409.13	-5.34166	58.2167
tYPSGFMDVVSIPk	1	CL4900.Contig2_All	0.938714	6	1.01355	6	50.21	2	2149.17	-3.50321	71.3393
vIFHNPGmQEDPAcGPLLDAVAIk	1	CL8328.Contig1_All	0.908193	5	0.999998	5	50.21	3	3216.69	-3.91298	72.7402
tGGLVVLAESFGHSVFk	1	Unigene9992_All	1.18176	3	1.25121	3	50.2	3	2356.34	-2.8779	93.27
iWAQSGSPLIPLVEFR	1	CL2143.Contig1_All	0.894816	1	0.936791	1	50.18	3	2117.2	-2.98936	88.3242
aSTLDGLDSLLSIVQmPR	1	CL6027.Contig1_All	1.08555	2	1.17444	2	50.18	3	2236.21	-1.37261	93.6396
gVLLESGSPEEFQLLPk	1	CL2334.Contig1_All	1.03535	1	1.02684	1	50.18	3	2451.4	3.62315	74.6122
iQDMQLLVR	1	CL2430.Contig1_All	1.04049	4	0.991282	4	50.15	3	1419.83	-1.69685	68.2943
eTLQEILGQGk	1	CL168.Contig1_All	0.964386	6	1.05517	6	50.12	3	1824.06	-3.45888	67.8943
dMEGAAIAYVADLLk	1	CL632.Contig1_All	0.8972	2	1.21719	2	50.12	3	2188.21	-3.47775	99.97
eLAEDGYSGVEVR	1	CL6454.Contig1_All	1.09265	11	1.03528	11	50.11	2	1727.87	-1.32928	48.45
eAAEETMLAYk	1	CL1747.Contig2_All	1.14827	3	1.1136	3	50.1	3	1863.99	-4.5172	59.9301
dAGAVVPTSFEAFEGAIk	1	CL3301.Contig1_All	1.04039	2	1.79117	2	50.1	3	2417.31	-4.98916	77.3095
iVVTGGAGFVGSHLVDk	1	Unigene8926_All	0.974146	3	0.821664	3	50.08	3	2264.31	-4.78942	65.944
dHGVHGFIVQLR	1	CL7344.Contig1_All	0.826345	4	1.5348	4	50.08	4	1681.94	-3.2058	52.5408
aEETLLQFANk	1	CL7776.Contig4_All	1.11135	2	1.20707	2	50.06	2	1872.07	0.223333	72.743
sDSILSLENEVASLQk	1	Unigene2511_All	1.14375	1	1.19918	1	50.05	3	2341.3	-1.08133	83.3239
aGILYDAIDGSk	1	Unigene14427_All	1.00901	4	1.25613	4	50.04	3	1831.03	-5.17923	70.1518
dVDMVIEAVIENVSLk	1	Unigene9294_All	0.966742	9	1.39605	9	50.04	3	2382.34	-1.00031	111.129
qLDkPFLMPVEDVFTIQGR	1	CL2355.Contig1_All	1.04914	5	1.04035	5	50.04	3	2841.57	-2.02309	84.8626
vAITLASSEGIPAELk	1	CL7269.Contig3_All	1.14961	1	1.3055	1	50.03	3	2207.31	-0.66688	71.0938
kDQIFVGDISTQYR	1	Unigene17093_All	1.04892	2	1.14621	2	50.03	3	2278.27	0.821528	59.1454
yYGGNEYIDQIENLTR	1	Unigene9783_All	0.704667	7	0.984818	7	50.03	3	2556.31	-4.05755	74.5108
iDMIALSFVR	1	Unigene9808_All	1.19695	7	1.35129	7	50.01	3	1468.84	-3.5474	88.279
aVADIIR	1	Unigene19094_All	0.960813	3	0.999353	3	49.99	3	1061.66	-2.08785	46.9122
fDATANDVPSDTFEVQGFPTVYFk	1	Unigene3673_All	0.961836	1	1.24208	1	49.98	3	3303.67	-0.290734	83.7375
fYDPQAGEVLIDGINLk	1	CL63.Contig1_All	1.02829	1	1.33643	1	49.95	3	2500.39	-1.74516	82.1047
iYLWFDPTk	1	Unigene896_All	0.740622	7	0.702504	7	49.94	2	1791.02	-5.00582	85.1595
lLAHLVEAEMNk	1	Unigene9780_All	1.03326	22	0.942612	22	49.9	3	1976.14	-3.50689	83.545
sIPSIINLDSLk	1	Unigene9511_All	1.02701	12	0.984907	12	49.88	2	1908.15	-4.46555	74.8551
dSNAEIDSLAR	1	Unigene20700_All	1.21078	6	0.999061	6	49.87	3	1494.77	-1.03121	42.953
aTGQEYAELLHEFMSAVk	1	CL715.Contig2_All	0.956754	1	1.21557	1	49.87	4	2632.38	-4.96335	96.1243
gELVSNHDELMSNFFAQPDALAYGk	1	Unigene995_All	1.37614	2	1.09112	2	49.86	3	3361.68	-4.77592	80.1661
nPIVLDLAYNSIEFPSLDHR	1	Unigene7804_All	1.01041	3	0.91544	3	49.85	3	2617.39	-0.126497	88.3694
gPEFATIINSVTSk	1	CL6560.Contig1_All	0.982481	12	1.07281	12	49.83	3	2072.18	-2.75555	78.7168
dSFLVDGVAFk	1	CL590.Contig5_All	0.999897	2	1.06973	2	49.81	3	1806.02	-2.2362	68.9478
rTQDGGTEVVEAk	1	CL1695.Contig2_All	1.14761	2	1.13739	2	49.81	3	1998.1	-4.3998	32.8902
tEAEITMLENNIIVYk	1	CL6240.Contig2_All	0.892862	1	1.04409	1	49.8	3	2489.37	-3.18068	86.8705
lPTDDNLLSQIk	1	Unigene14143_All	0.936507	16	1.12113	16	49.79	2	1965.14	-4.19787	67.7473
iQLLDLPGIIEGAk	1	Unigene21758_All	1.19047	3	1.53742	3	49.78	3	2088.28	-3.76927	91.3405
yLGLLATGMTADAR	1	Unigene11788_All	1.03131	9	1.03225	9	49.77	3	1756.96	2.21307	78.4233
kPLMLITEYLR	1	CL971.Contig2_All	0.923211	2	0.993905	2	49.77	3	1985.2	-2.36912	88.2714
fDPDFIDIR	1	Unigene18805_All	1.04246	8	1.05652	8	49.76	3	1441.76	-1.14907	70.2232
lVDSAAVFHNASTR	1	CL3329.Contig2_All	0.975494	5	1.05283	5	49.76	3	1791.96	-3.19723	56.3997
vPDEMSLEAHDLIDR	1	Unigene13705_All	1.09311	2	0.948096	2	49.76	3	2044.03	0.174489	69.7642
dILEINHPSGPFGTk	1	Unigene18387_All	1.06608	2	1.0653	2	49.76	3	2233.24	-1.03576	61.3377
nPELAHVLNDPSILR	1	CL5310.Contig1_All	1.00714	3	1.0162	3	49.75	3	1992.11	-1.81579	67.0404
lINEETIPAVLPQVVELLGHQk	1	Unigene9981_All	0.874882	3	1.03669	3	49.74	3	3048.79	0.267447	97.1858
lDHPLPLPSVLk	1	CL6388.Contig1_All	0.97441	10	0.88773	10	49.73	3	1937.2	-3.52383	65.4312
lVIIPDHYIFTTDER	1	CL1436.Contig1_All	1.02498	5	1.10537	5	49.73	3	2136.16	-1.92443	74.4004
mLVYQDLLTGDELLSDSFPyk	1	Unigene21414_All	0.716659	1	1.18291	1	49.73	4	3375.8	-3.49674	93.6387
dDLFNINANIVk	1	CL4342.Contig2_All	1.02335	2	1.0965	2	49.71	2	1984.13	-3.14752	67.8736
kSGQQVQEDAGAALDNAGEk	1	Unigene3183_All	0.892626	2	0.874789	2	49.7	4	2928.57	-3.34864	51.8979
iHNIGATLVGVDk	1	Unigene9763_All	0.964267	2	0.989379	2	49.69	2	1945.17	-2.00629	57.901
yQGLVIPEAYER	1	CL1277.Contig5_All	0.93159	3	1.49952	3	49.68	2	1741.94	0.848532	63.2674
yRVENLYEGPLDDAYANAIR	1	CL1787.Contig1_All	1.03651	2	1.20195	2	49.68	3	2646.34	-1.31447	72.4942
iIGATNPAESAPGTIR	1	Unigene18490_All	1.10746	5	1.14185	5	49.67	2	1872.05	1.21256	49.9
lGDFSNIFHR	1	Unigene7140_All	0.91937	5	1.04334	5	49.65	3	1509.81	-1.51808	72.5151
lFEVALQNFk	1	Unigene14983_All	1.08196	15	1.05102	15	49.63	3	1817.07	-3.69607	87.7828
aTDVMIAGk	1	CL3696.Contig1_All	0.713799	4	0.773139	4	49.62	2	1513.88	-5.70711	44.9794
tLQALQYVQDNPDEVcPAGWkPGEk	1	CL5263.Contig2_All	0.988828	1	1.12442	1	49.6	4	3755.97	-3.776	72.402
dAINVEQAFLTMAGEIk	1	CL1506.Contig2_All	1.238	5	1.42234	5	49.59	3	2458.34	-2.82555	97.982
sVEAVNVDGEk	1	CL6872.Contig3_All	0.883921	1	0.956373	1	49.58	2	1754.96	-5.60928	40.058
yPVGIASEGEITELPGTEFFPDTk	1	CL2542.Contig2_All	1.13384	4	1.2382	4	49.58	4	3205.67	-1.1951	79.9372
aLNDTIITGVPTTIDYHk	1	Unigene14513_All	0.948691	1	0.966885	1	49.57	3	2580.45	-1.29949	66.3264
sVEMHHESMLEALPGDNVGFNVk	1	CL116.Contig6_All	1.56735	4	0.761327	4	49.57	3	3148.6	-1.12865	65.8498
dcLEEMTDSVDR	1	CL62.Contig2_All	1.58517	2	0.915241	2	49.53	2	1773.79	-2.60189	55.1173
fAVDQHNDkENTLLELVR	1	Unigene20700_All	0.994845	15	0.933908	15	49.53	3	2749.51	-1.02069	72.0727
iGSAGVVR	1	CL7769.Contig1_All	0.975084	3	1.029	3	49.52	3	1062.65	-4.22117	33.8775
rPITTALAQGGLLQPR	1	CL8898.Contig1_All	1.08279	4	1.11824	4	49.52	3	1996.19	-1.3898	61.1879
yYTISLLNPLLk	1	CL7343.Contig2_All	1.06074	5	1.1009	5	49.52	3	2046.24	-3.15517	85.863
nIIVATGSDVk	1	Unigene18627_All	1.233	5	1.44004	5	49.51	2	1725.04	-0.154633	47.2104
kNEILFIAPTGEEISNR	1	Unigene5580_All	1.25061	1	1.1702	1	49.51	3	2539.43	-2.46187	64.1855
gFEVIEAAk	1	Unigene349_All	0.966228	8	0.625542	8	49.5	2	1571.92	-4.89921	57.6016
eGLSFLETSALEALNIEk	1	Unigene3358_All	0.636387	2	0.952256	2	49.5	3	2572.43	-2.25509	98.7906
lLSSPLTMASYGDVLHLPSYDSVSR	1	Unigene1168_All	1.35091	2	1.44876	2	49.5	3	3012.56	-1.53561	86.6408
yDLGVGDYLFTPAGDVHR	1	Unigene106_All	1.02771	8	0.923257	8	49.49	3	2603.36	-2.49598	69.4652
vLSTEEIDEHLTAISER	1	Unigene11788_All	1.00561	2	0.965856	2	49.48	3	2246.17	-3.32598	70.7534
eANLYTEIAEGIHSYGVTR	1	Unigene18796_All	1.10561	1	0.825898	1	49.48	3	2427.24	-3.13441	82.9444
sTLLNLLAGDLVPTEGEVR	1	CL4995.Contig3_All	0.966793	2	1.5065	2	49.45	3	2301.29	-0.965319	95.9773
dAVTDLSLHYLAk	1	Unigene5496_All	1.20674	8	1.05821	8	49.43	2	2054.18	1.12939	66.5062
amQLLESGLk	1	CL4471.Contig2_All	1.02011	4	1.19626	4	49.42	3	1714	-3.80585	60.7186
iFSVIHEVYR	1	CL2392.Contig5_All	1.44381	2	0.829158	2	49.42	3	1566.89	-2.65895	81.238
aLVLALAQk	1	Unigene12244_All	1.24947	8	1.45336	8	49.41	3	1535.01	-1.76846	69.7784
dLHDLAEIATGIIR	1	Unigene9772_All	1.03413	2	0.84625	2	49.41	3	1841.04	-0.91747	86.2798
nPTNVELFDIAQSNSEHSR	1	Unigene18547_All	0.923496	1	0.817231	1	49.41	3	2462.21	-4.90113	62.0952
yPIVGTVTSN	1	CL1913.Contig1_All	1.27242	5	0.835206	5	49.39	2	1354.75	-0.713887	52.4259
dFGEESEGLHIVQEYVk	1	CL8047.Contig1_All	1.44617	5	1.15609	5	49.39	3	2587.34	-2.63841	76.5137
gELLAGLVk	1	CL8371.Contig1_All	1.95126	13	4.56904	13	49.38	2	1507.96	-7.43211	69.6136
dVADANSLISSLEk	1	CL2334.Contig1_All	0.982348	2	1.12261	2	49.38	2	2070.15	-0.385251	72.4089
fDALLVELk	1	CL5347.Contig1_All	1.16477	28	1.20115	28	49.37	2	1656.01	-4.22501	87.2033
aAEAVEEFTGIIIALk	1	Unigene14296_All	1.08139	2	1.13331	2	49.37	3	2283.34	-2.27479	113.237
rDFNVDELLNEDLGDDLEk	1	CL2675.Contig3_All	1.03373	2	0.859239	2	49.37	3	2857.47	-0.735621	79.2602
lGVPLGTIAHALEk	1	CL3232.Contig1_All	1.06088	3	1.1841	3	49.36	3	2027.24	-3.86496	81.1219
iFLENVIR	1	CL9500.Contig1_All	0.88956	33	0.709079	33	49.35	3	1307.8	-2.57337	72.2015
fLQSLELFEEDER	1	Unigene9919_All	1.12508	7	1.07382	7	49.32	2	1959	0.840216	92.1132
dSLLDILSAASPEPMVS	1	CL5398.Contig1_All	1.0875	2	1.46009	2	49.31	2	2049.07	-3.21688	91.9155
dVVEGAPQNLLESVAHLIASk	1	CL3744.Contig1_All	1.12961	3	0.766784	3	49.3	4	2798.58	-1.57038	101.58
aAGEEENPFQGSLESDPFGGLFGSAEEk	1	CL2758.Contig4_All	0.782439	1	0.938814	1	49.29	4	3507.7	-1.67518	85.9581
iVSLANEFk	1	Unigene11974_All	1.04464	6	1.02099	6	49.27	2	1628.98	-3.96515	74.1652
sLAGSYGGVNLGk	1	CL1303.Contig2_All	0.867398	3	0.790162	3	49.26	2	1831.05	-3.53825	52.1268
iFSLPDLNLITk	1	CL2268.Contig1_All	0.942546	5	0.879178	5	49.26	2	1982.21	-3.88684	88.819
vLIFEITEPNFPHDEAVR	1	CL6355.Contig1_All	0.919741	1	0.845579	1	49.22	3	2430.29	-1.04987	81.8672
lHVQLLLGk	1	CL151.Contig6_All	0.931084	6	0.816793	6	49.22	2	1629.07	0.971036	63.1854
eYQIIDTLVGPSLkDEVMk	1	CL5255.Contig2_All	1.29921	1	1.37579	1	49.21	3	3090.74	-2.8096	84.5556
iLYGPMYDGVR	1	CL325.Contig1_All	1.32085	10	1.62401	10	49.19	3	1587.85	-0.115427	63.4054
aHGPVPEPGAIVIAR	1	Unigene17247_All	0.93418	3	0.743962	3	49.18	3	1788.04	-1.25805	50.132
yLSGEAQHIEWSk	1	Unigene9511_All	1.23622	5	1.16892	5	49.18	3	2156.16	-1.42011	59.8666
lQADQFkPVEQVTLEPFER	1	CL2038.Contig1_All	0.951922	4	1.11765	4	49.15	3	2882.59	-0.715354	74.139
aFSHmLSLANLAEEVEIAHR	1	CL962.Contig3_All	0.877192	3	1.00682	3	49.15	4	2558.33	-1.07446	79.6901
aYFEATTLQDHGR	1	Unigene5197_All	1.07416	1	1.01609	1	49.13	3	1812.91	-2.82485	50.8179
nLLEELIENk	1	CL8197.Contig2_All	0.933334	4	1.11691	4	49.13	3	1823.07	-2.31658	86.4195
yIPSNTFSYYDQMLDTTAmLGAVPPR	1	CL9612.Contig2_All	0.888748	4	0.855818	4	49.13	4	3575.8	-0.400743	84.2961
aSSYSEFFk	1	CL757.Contig2_All	1.23288	10	0.991351	10	49.11	3	1673.9	-1.78193	60.2949
vDINILR	1	Unigene21188_All	1.32015	3	0.96944	3	49.09	3	1146.71	-2.00857	54.469
dLVGVAYTEEETk	1	Unigene2532_All	1.14805	5	1.30445	5	49.09	3	2062.11	-3.68626	56.841
qTGQSEGYGFLEFR	1	Unigene16704_All	0.978268	4	1.17822	4	49.06	2	1922.94	-5.41026	65.9275
gLTLEEIEAk	1	CL8672.Contig1_All	1.15284	3	1.23015	3	49.05	3	1711	-3.21723	61.6681
vVAEDTYDVVk	1	CL8484.Contig1_All	1.03717	6	1.09066	6	49.05	2	1846.04	-0.416067	53.9633
vVIADSGELPL	1	CL557.Contig1_All	1.31052	1	1.007	1	49.04	2	1416.83	0.811845	67.7068
iVNDGVTVAk	1	CL8517.Contig2_All	0.980734	6	1.2199	6	49.04	2	1623.98	-4.6296	45.2953
gLVDSDTLPLNVSR	1	Unigene18800_All	1.19473	6	1.20673	6	49.03	2	1790	-0.226907	57.786
aFGAELVLTDPAk	1	Unigene7518_All	1.05844	1	1.431	1	49.03	2	1940.12	-7.52248	66.4766
vAVFVGGVDTTATETk	1	Unigene11996_All	1.04579	1	1.04893	1	49.03	3	2203.23	-4.65637	64.8437
vEAMPTFLFLk	1	CL4920.Contig1_All	0.972289	23	1.07348	23	49.01	2	1904.11	-1.47449	85.9569
qLNkPVVVASQLLESMVEYPTPTR	1	Unigene10199_All	0.973266	1	0.803843	1	49	4	3307.85	0.114214	97.2673
aEITHIFR	1	CL4403.Contig1_All	0.951433	5	1.05112	5	48.96	3	1290.74	-2.38433	53.1823
kGVPDLTMVDLPGITR	1	CL3408.Contig1_All	1.67912	1	1.89777	1	48.94	3	2320.35	-0.0433154	72.1609
fGQEEETYNIVAAHGYFGR	1	Unigene16087_All	1.06381	2	1.04151	2	48.94	3	2492.21	-0.45063	73.4674
vVDAPEILTVIGk	1	Unigene16874_All	1.04237	9	0.986406	9	48.93	2	1962.21	-0.782735	81.6193
aLEQLDGAIAk	1	Unigene16115_All	1.13519	7	1.21912	7	48.92	2	1737.03	-1.77565	62.1666
nDAYmVPIAPEVSLAR	1	Unigene3122_All	1.3865	4	1.18898	4	48.92	2	2066.09	-1.91158	60.5012
lNPLVSR	1	CL1695.Contig2_All	1.12751	3	1.00353	3	48.91	3	1102.69	-1.61338	41.5461
mAEISPSAIPFPHR	1	CL7006.Contig1_All	1.14215	5	1.09639	5	48.91	3	1872.99	-3.22472	57.8487
gEMLDLQHAAAFLPR	1	CL3040.Contig2_All	1.05056	7	1.04675	7	48.91	3	1973.05	-3.34736	77.0498
tFTPTQVLGMVLSDLk	1	CL1361.Contig1_All	0.899815	7	1.20737	7	48.91	3	2358.35	-2.58122	107.983
lLFSGFANIPLNVTPGTk	1	CL1950.Contig3_All	2.38643	1	1.1217	1	48.91	4	2497.46	0.328768	86.61
lEQFLVDLHLESk	1	Unigene2759_All	1.44563	1	1.02507	1	48.87	3	2179.26	-0.609905	93.5146
dGVILGADTR	1	CL6472.Contig1_All	1.04901	8	1.02814	8	48.85	2	1320.74	-3.17432	41.0146
cLLEEEAIk	1	CL4965.Contig4_All	1.63625	4	1.16137	4	48.8	2	1712.97	-2.46746	54.9556
lSLGLTEEDAk	1	Unigene3707_All	1.23362	4	1.07573	4	48.8	3	1784.03	-0.498083	55.3536
nGGIDSEEDYPYk	1	CL1951.Contig2_All	1.07307	1	0.950288	1	48.8	2	2095.04	-1.5237	45.0837
vLPSIGNEVLk	1	CL8569.Contig1_All	1.0129	10	1.13823	10	48.79	3	1777.1	-3.24989	63.4197
iSVQGIDGVLFPAEESk	1	CL6419.Contig2_All	0.923394	1	1.14515	1	48.79	3	2397.34	-1.68674	79.1836
tENQDAIDAAIVGTLADPk	1	CL9622.Contig2_All	1.17361	1	1.15284	1	48.79	3	2550.39	-0.774109	75.2113
eEIIQDLYNTk	1	Unigene16969_All	1.08003	4	0.992533	4	48.78	3	1974.1	-0.229267	76.9586
gELDDTAAFk	1	CL1709.Contig1_All	1.10476	2	1.41944	2	48.77	2	1674.91	-5.95849	48.1771
sMVVALVDMER	1	CL3835.Contig1_All	1.0205	1	1.05439	1	48.74	3	1553.83	-1.53461	76.3255
aVVDDILPPAFITR	1	Unigene17136_All	1.10225	5	1.29402	5	48.74	3	1831.06	-3.93704	77.8311
lILEVIEAEANEIk	1	Unigene11597_All	0.899943	3	1.17951	3	48.71	3	2192.3	2.0454	101.3
tNEQTVQEMLNLAVk	1	CL2724.Contig1_All	1.01119	1	1.17412	1	48.71	3	2326.29	-0.762724	79.229
sIFDFQSIQk	1	Unigene7770_All	1.16914	5	1.05258	5	48.7	2	1821.03	-1.07946	68.8635
kPTEGPQQmIQVVLNNATVETDNPDLR	1	Unigene16722_All	0.751288	1	0.705765	1	48.7	4	3631.91	-2.57232	72.907
sVVHSAIQNEAR	1	Unigene2890_All	1.25816	7	0.705314	6	48.69	2	1614.88	-1.98338	39.1453
iSDGAGAEEESDk	1	Unigene5296_All	0.978713	2	0.85523	2	48.68	3	1915.96	-4.00715	35.3613
aANLSVESYWPSLFAk	1	CL9438.Contig2_All	0.982977	2	1.08749	2	48.68	3	2391.31	-2.05597	84.9852
eHAPVALGAAGVAAVVAESyAR	1	CL7232.Contig2_All	0.852336	4	1.00654	4	48.68	4	2717.51	-2.93082	79.2104
aFYDMLDk	1	Unigene12258_All	1.12029	6	1.03334	6	48.66	2	1610.86	-4.14558	67.9464
dINALEQHIk	1	Unigene11461_All	0.952973	7	0.77685	7	48.66	2	1789.04	-0.715352	56.3393
nVVLDEFGAPk	1	CL4916.Contig1_All	0.873555	5	0.964801	5	48.65	3	1797.03	-4.13533	60.864
lADEIGYPVMIk	1	Unigene14513_All	0.892758	2	0.910708	2	48.65	2	1957.13	-1.27786	70.4929
aEIDTVLGVGVPITEPDTHk	1	CL2673.Contig2_All	1.01414	2	1.71935	2	48.64	3	2699.49	-6.86887	70.3066
tEFPIPDNVLYcGALSR	1	Unigene9639_All	0.976705	2	0.818959	2	48.62	2	2256.17	0.7382	74.681
tkEDIINFIEENR	1	Unigene3673_All	1.07702	14	1.44836	14	48.62	3	2229.23	-3.34777	80.7411
rIPYAELFAR	1	CL9325.Contig2_All	0.945114	9	1.04801	9	48.61	4	1539.89	-2.70378	64.4792
hNNILAEEAAQIFDNR	1	CL4484.Contig5_All	0.929265	1	1.11539	1	48.61	3	2159.11	-3.85478	78.4513
kLAEEVFSIVGR	1	Unigene14874_All	1.44345	5	1.75106	5	48.6	4	1956.17	0.425332	83.6506
iDAIDTENYVck	1	Unigene10113_All	1.01212	4	1.18215	4	48.59	3	2049.07	-2.65789	58.4635
vIGVDLNPSR	1	CL6693.Contig23_All	1.32187	6	1.54895	6	48.57	3	1373.8	-1.68624	50.3799
nVQDGSTTFHSATVAVVGER	1	CL8108.Contig3_All	1.21931	1	1.06638	1	48.57	3	2379.21	-3.33288	52.6441
vVEVNALAk	1	CL9612.Contig2_All	0.759172	14	0.884245	14	48.55	2	1550.96	-6.48583	51.1601
qLVTDYSNNPQR	1	Unigene349_All	0.915777	2	0.603398	2	48.55	2	1738.9	-2.77683	42.4606
mGDPSVEVSEENR	1	Unigene2767_All	1.30223	1	1.21743	1	48.55	2	1768.83	-3.09942	34.3299
iQEATAANDNR	1	Unigene18791_All	1.11508	3	0.944021	3	48.53	2	1506.77	-5.34803	34.3934
gVDLDALLDmSTDELVk	1	CL6791.Contig1_All	0.85464	5	1.18153	5	48.53	3	2458.31	-2.70317	83.8021
iINEPTAAALSYGLNNk	1	CL5012.Contig2_All	0.866286	5	1.09727	5	48.52	3	2397.35	-3.23122	70.5364
lEIPDGAVIADk	1	Unigene9511_All	1.02728	13	1.07897	13	48.51	2	1849.08	-5.00774	62.2502
yYIGEIDMATVPLk	1	Unigene12009_All	0.961074	2	1.30391	2	48.51	2	2221.24	-0.373679	75.027
kVEPEPSFEMLTNPAR	1	CL1839.Contig4_All	1.11525	2	0.997787	2	48.5	3	2453.32	-3.85127	61.9786
vcWLGGcVSSDILAAMEk	1	Unigene14324_All	0.911896	1	0.991145	1	48.5	3	2604.33	-3.83687	100.232
lAVAGAFHTGFMEPAVSR	1	Unigene10441_All	0.962581	6	0.847177	6	48.49	3	2165.14	-2.28242	70.8259
eFAEILDANEAFQNLDSk	1	CL3787.Contig1_All	1.00423	1	1.1022	1	48.49	3	2662.38	-0.847126	85.9161
vNLIGEHIDYEGYSVLPMAIR	1	Unigene21093_All	1.09718	1	1.12461	1	48.49	3	2693.43	-0.308679	83.0594
eTVLNALLk	1	Unigene14279_All	0.89846	1	0.891125	1	48.48	3	1609.01	-2.34678	75.5803
mDIDYQVLHDAFFk	1	Unigene13680_All	1.05621	2	0.951278	2	48.47	4	2350.23	-3.00593	83.6984
aPHDLYESYYNSNk	1	Unigene18800_All	1.35843	4	1.33631	4	48.46	3	2309.16	-2.65429	52.2021
mELTLQQLk	1	CL1913.Contig1_All	1.02443	6	0.829293	6	48.43	2	1712.02	-3.4658	67.2724
fIDSNHFNVPHGk	1	CL8328.Contig1_All	1.12079	9	0.752992	9	48.43	2	2120.14	-5.55353	54.0557
kPELVGVVSDAFENFQLk	1	CL4307.Contig2_All	1.25143	1	1.02003	1	48.43	4	2932.68	-3.44406	90.7995
qQADSALSEFLQEIk	1	CL165.Contig1_All	1.00591	2	0.976178	2	48.42	3	2315.25	-8.72263	89.7806
eTGHIQILYGNLAPDGSVAk	1	Unigene21026_All	1.15762	2	1.05491	2	48.42	3	2691.49	-2.29128	62.6462
iLALNASYFLk	1	CL2038.Contig1_All	1.16254	6	1.07172	6	48.38	3	1861.14	-2.47631	85.3501
lSDGPFGEVLk	1	CL8671.Contig1_All	1.09401	6	1.16229	6	48.37	2	1770.03	0.760388	66.1152
aTVTTVIPLPPDEEkELR	1	CL168.Contig1_All	1.00017	4	0.926392	4	48.37	3	2616.5	-2.35227	63.3849
lALGSDVSFDTk	1	CL9312.Contig1_All	1.02666	9	1.12568	9	48.36	2	1861.05	0.940143	61.4207
tTVSDLMNVNALGNAEIk	1	Unigene12305_All	1.12779	1	1.1817	1	48.34	3	2498.36	-4.99833	71.0818
kEDAIYYLEGVIEk	1	CL7852.Contig2_All	1.0496	7	1.18083	7	48.34	3	2582.48	-3.38014	84.284
aVAVLSNLATIHEGR	1	Unigene5871_All	1.10949	1	1.05347	1	48.3	3	1855.07	-2.14113	78.0965
eNPADPPIELGPVFENVNEFHR	1	Unigene10040_All	0.888262	1	0.990859	1	48.3	3	2824.41	-2.97853	75.6383
fVTAVVGFGk	1	CL3810.Contig1_All	0.957595	10	1.09171	10	48.28	2	1632.99	-3.31213	70.2922
iLSEEYGWDk	1	CL1787.Contig1_All	1.03347	9	1.10016	9	48.28	3	1848	-1.38077	65.2665
nDYLQQAIR	1	CL325.Contig1_All	1.23717	7	1.65833	7	48.27	3	1424.78	-2.42031	49.3124
aYVPVHELmDGEEIDR	1	CL2542.Contig2_All	1.0764	14	0.945853	14	48.27	3	2193.08	-1.67719	64.366
eGLSFIETSALEATNVEk	1	CL3363.Contig1_All	0.9659	1	0.954664	1	48.26	3	2546.37	-3.86918	81.3112
sVEMHHEALQEALPGDNVGFNVk	1	CL116.Contig2_All	1.97907	3	1.40048	3	48.25	3	3129.62	-0.386934	60.5444
tLTAVHEAmLEDIVYPAEIVGk	1	CL7914.Contig3_All	1.00608	7	1.24182	7	48.22	3	3023.66	-0.405674	77.1326
eGINVEEAFQVIAk	1	CL2102.Contig3_All	0.979663	11	0.944809	11	48.21	3	2155.22	0.116378	79.0437
iLVLLDDLSLk	1	CL4288.Contig2_All	0.802613	3	1.01591	3	48.19	3	1850.18	-0.932425	106.976
vYPVVSDEYLk	1	Unigene13963_All	0.962647	7	1.10924	7	48.19	3	1920.09	-0.734299	61.1704
lGYADLVEEVPLGDGGk	1	Unigene5496_All	0.988059	4	1.00565	4	48.17	2	2340.27	-8.63827	74.9556
sVEMEGLFWGASk	1	CL737.Contig2_All	1.0485	1	1.31609	1	48.16	2	2049.08	-8.7113	75.4156
tLFNELEVVEGMk	1	CL2530.Contig3_All	1.13989	3	1.12782	3	48.16	3	2117.17	-4.25248	86.2146
qIQELVEAIVLPmTHk	1	CL1875.Contig5_All	1.11081	5	1.20917	5	48.16	3	2473.42	-5.16748	93.8531
sNLDLPLFDLMGGISk	1	CL8175.Contig1_All	1.03697	2	1.08514	2	48.15	3	2328.3	-4.94592	93.1087
aALSVLDEMIFEGYEPSk	1	CL2236.Contig2_All	0.846767	3	1.12138	3	48.15	3	2607.38	-0.955977	94.512
yFNVMILGPTQSPYEGGVFk	1	CL6969.Contig1_All	1.17843	1	1.12194	1	48.14	3	2855.52	-0.506693	84.7052
lSSTLTTIQAVLEDAEQk	1	Unigene3450_All	1.15893	1	0.727262	1	48.12	3	2555.44	-0.551054	104.591
eEVFGPVAPLLk	1	CL1216.Contig2_All	1.27535	5	1.31127	5	48.1	2	1907.15	0.397953	72.6887
qFLLGSSLMVSPVLHR	1	CL4850.Contig5_All	1.26582	1	1.30162	1	48.09	3	2088.19	-1.19566	76.8062
eALESVTAEQk	1	Unigene8130_All	1.18594	1	1.50616	1	48.08	2	1813.01	-0.91299	46.0277
lSYGESQILDk	1	CL1926.Contig1_All	1.1192	5	1.07956	5	48.08	2	1861.05	-0.885688	60.5111
gDDVFELQVk	1	CL6154.Contig1_All	0.880504	1	0.925792	1	48.07	2	1757.98	-7.1429	59.8569
sANEVLLVIEAYk	1	Unigene21192_All	1.09223	6	1.47944	6	48.07	3	2057.21	-1.54329	90.4797
lLADDLFLTk	1	Unigene11450_All	1.03988	6	1.0609	6	48.03	3	1757.06	-2.84993	78.4773
aLVDSHTGETLTFAQFk	1	Unigene14949_All	1.06138	3	1.12079	3	48.03	3	2473.35	-1.99109	67.594
lGSVAIENALk	1	CL3403.Contig1_All	1.28082	4	2.34477	4	48.02	3	1723.05	-5.75248	63.2143
lSVNLEELNk	1	CL3408.Contig1_All	1.73076	3	2.13235	3	48.02	3	1767.04	-4.26945	62.62
lTVEDVEYLLMk	1	CL4233.Contig1_All	1.08245	6	0.999623	6	48.02	3	2061.17	-3.34064	93.6077
gEFDEAETLLLEALNR	1	Unigene5098_All	0.978057	1	0.926369	1	48.01	3	2124.11	-1.94747	99.0585
lIAAVFFPDPDSHAPLLQR	1	CL3963.Contig1_All	1.08555	9	0.882344	9	48.01	3	2411.33	-1.81785	89.5377
sVHEPMQTGLk	1	Unigene115_All	0.907074	8	0.620085	8	47.98	3	1835.02	-4.86136	40.4446
gLEIDPNNEALk	1	Unigene21049_All	1.13695	1	1.41492	1	47.97	2	1921.08	-4.43794	51.5912
eNYELGLPVIQk	1	CL5278.Contig2_All	1.02677	3	1.57085	3	47.97	2	2011.16	-4.33368	63.2054
hGYIGEFEYVDDHR	1	CL6010.Contig1_All	1.04458	5	0.955845	5	47.97	3	2040.97	-1.71314	54.9576
sGDVYIPR	1	Unigene18805_All	1.04167	3	0.901607	3	47.96	3	1210.67	-2.09866	40.3229
eNFLLDEIk	1	CL3408.Contig1_All	1.9792	5	2.52197	5	47.96	2	1728.99	-4.3346	72.0339
kGSDISENAFVANLSR	1	CL1375.Contig2_All	0.908748	1	0.941081	1	47.96	3	2316.27	-4.2743	60.1545
lQEYVEDLNANIENLDTR	1	Unigene12341_All	1.33132	1	1.38573	1	47.96	3	2453.24	-1.52676	92.6077
mELVDAAFPLLk	1	Unigene3007_All	0.981735	39	1.14333	40	47.95	2	1971.14	-1.53678	84.9837
lLEEHLVSNPSDIDGLk	1	Unigene5681_All	0.954093	4	0.981614	4	47.95	3	2487.38	-4.67333	68.5843
lSANELMAHPFITk	1	CL2533.Contig2_All	1.08805	2	1.06986	2	47.94	4	2180.23	-3.06143	67.7081
aVDGSFVFNk	1	CL5856.Contig1_All	1.11331	3	1.20432	3	47.92	3	1691.95	-4.67454	57.8803
gISVNTAHDMLSR	1	CL1706.Contig2_All	1.19202	2	0.990998	2	47.92	3	1704.9	-1.72748	51.889
fAFVLFDSASk	1	CL2383.Contig1_All	1.37457	3	2.03533	3	47.91	2	1840.05	2.93262	84.9235
iTYTEAVAILEEAAk	1	CL3719.Contig1_All	1.02952	7	1.19242	7	47.91	3	2230.28	-0.562762	92.4228
vSQQLYSALTSLQmGLTEDk	1	CL807.Contig1_All	0.454102	2	1.10867	2	47.9	3	2836.51	-3.86765	97.278
dSELIEENALGVR	1	Unigene6931_All	1.11286	4	1.69114	4	47.88	3	1748.93	-0.168551	58.3294
gLFYALDLGGTNFR	1	CL2941.Contig2_All	1.02584	2	0.915396	2	47.88	2	1848	0.789331	84.739
iPVSSENLVVLDSAGR	1	Unigene20878_All	1.22368	3	1.15712	3	47.88	2	1960.11	1.68704	64.6125
sLGAAIIYNk	1	Unigene5375_All	1.01084	2	0.9453	2	47.87	2	1658	-2.96921	55.9247
lVPEYSYSLDEEGIGk	1	CL1046.Contig1_All	0.84737	1	0.981831	1	47.87	3	2407.28	-3.62935	66.4946
aVDSLVPIGR	1	Unigene115_All	1.06822	15	1.14987	15	47.85	3	1330.8	0.744662	53.4717
lEDDFDNFTTSk	1	CL387.Contig1_All	1.26491	2	1.15674	2	47.85	2	2040.03	-3.68821	67.367
fLSPSEVSVDTVEGGNTIVk	1	Unigene18627_All	1.17839	2	1.32334	2	47.85	3	2686.46	-4.84856	68.7253
hELTFHSR	1	Unigene404_All	0.763088	1	2.9072	1	47.84	4	1330.71	-7.06471	30.1527
vAAPLGVEVNVSPSk	1	Unigene3231_All	0.988752	3	0.94561	3	47.84	3	2075.23	-2.6916	56.891
aPPPPSPAEEk	1	Unigene16287_All	1.24832	4	1.2523	4	47.83	2	1727.97	-4.1934	36.8317
eAIDAMNGQELDGR	1	Unigene17955_All	1.15193	2	1.01962	2	47.83	2	1822.89	-0.846757	49.3842
eVFVGGHVLR	1	CL8108.Contig3_All	1.02486	5	0.891294	5	47.81	3	1416.82	-2.33339	49.0481
lPQLPGTSIEGVEk	1	CL5085.Contig5_All	1.00039	4	1.15473	4	47.81	2	2076.2	-5.4184	62.7023
vGEIIAITVEEEEDAAk	1	CL2254.Contig4_All	1.11601	4	1.2202	4	47.81	4	2424.33	-1.56619	94.2966
dNIDEMTGTSASVLLSILk	1	CL7708.Contig1_All	1.03013	2	1.11846	2	47.81	3	2615.43	-2.8147	94.4833
vLHQQMEFFSSNPSADTLNR	1	Unigene16613_All	1.00124	1	0.893258	1	47.8	3	2625.28	-7.03774	67.5685
lANVPSLGFGALVSPGR	1	Unigene14361_All	1.28013	1	1.08257	1	47.79	3	1959.14	1.74331	78.1175
gFESVLAVLEDAVNDAPR	1	Unigene7021_All	0.746352	1	0.690298	1	47.79	3	2206.16	-3.15194	109.989
nIMDMNAGLGGFAAALQSPk	1	CL6253.Contig1_All	0.969061	1	0.946315	1	47.79	3	2614.39	-3.4713	81.3914
gYQAQLAEANEk	1	CL4776.Contig2_All	1.27966	1	1.13906	1	47.78	3	1930.04	-4.0141	44.1148
lLQFEEELk	1	CL1212.Contig1_All	1.03724	4	1.48773	4	47.76	2	1757.02	-4.5718	79.667
lANNLENLIIk	1	CL9604.Contig1_All	1.06574	3	1.2143	3	47.76	3	1863.15	-2.39861	77.2959
lETGVPFAANLALVPIVHPPR	1	CL7487.Contig1_All	0.957365	3	0.970302	3	47.76	3	2515.46	-2.11147	84.8345
vDTLVATSPIk	1	CL6066.Contig1_All	1.19404	3	1.11424	3	47.74	2	1752.06	-4.49433	56.8259
fIIEAANHPTDPEADEILSk	1	CL1630.Contig6_All	1.24143	4	1.5559	4	47.74	3	2818.5	-2.26859	71.3822
gDLGMEIPIEk	1	Unigene9808_All	1.08607	5	1.11652	5	47.73	2	1810.02	-2.43112	60.7999
tLASDGIAGLYR	1	CL6379.Contig1_All	1.07722	4	1.06402	4	47.72	3	1540.86	-1.1154	47.9949
iVEETVDQFFALk	1	Unigene111_All	0.8008	2	1.03038	2	47.72	3	2147.23	2.63331	102.197
iLTTVALESTcPVSDNR	1	CL1461.Contig2_All	1.3349	5	0.91957	5	47.72	2	2180.15	-0.0584311	68.2513
vSTSINDVAAEIER	1	CL2862.Contig2_All	1.27707	4	1.0095	4	47.71	2	1807.97	1.22816	68.584
aSLGLLTSGIHPTIVSDSLHk	1	Unigene5496_All	2.54013	3	1.03875	3	47.69	4	2754.59	-1.11459	70.597
aTLFPGDGIGPEIAESVk	1	CL1699.Contig3_All	1.06397	1	1.21911	1	47.68	3	2409.34	-3.96244	74.7268
hLPLYEDmASk	1	CL5874.Contig1_All	1.01729	3	0.982884	3	47.67	3	1928.04	-1.00298	55.7233
gMEIENQEQLVEHHIPIEATR	1	CL2694.Contig2_All	0.785159	1	0.920481	1	47.67	4	2777.42	0.916849	64.9927
hVEDIELIDR	1	Unigene9881_All	1.07008	6	1.00354	6	47.66	3	1542.84	-2.23588	50.6712
yGYNAATGQYEDLMAAGIIDPTk	1	CL8517.Contig2_All	0.756478	2	0.942752	2	47.65	3	3070.57	0.930464	76.2038
dSHGIAQVk	1	CL6732.Contig1_All	0.909662	7	0.936199	7	47.65	3	1562.9	-4.04569	32.3451
aLIAAEYSGIk	1	CL7335.Contig3_All	1.05307	6	1.22473	6	47.63	2	1744.04	-5.92929	62.8502
rELDSNIEYGDSR	1	CL439.Contig4_All	1.06704	4	1.12154	4	47.63	3	1857.92	-1.17655	39.5789
gFNLQHVSDGLYGR	1	CL6375.Contig1_All	1.18061	3	0.92095	3	47.62	2	1866.98	-0.492687	59.6173
lDAGALLSHSFELEAk	1	CL3015.Contig3_All	0.972865	5	0.951267	5	47.62	3	2309.29	-2.08997	77.1964
fYPGESLPLWHEELEAk	1	CL5398.Contig1_All	1.1985	5	1.09083	5	47.62	3	2653.41	-2.34841	77.9192
aFGEAFLEDk	1	Unigene18986_All	1.44973	4	1.51287	4	47.61	2	1734.94	-5.68946	67.1113
lADVLELVGITk	1	CL2586.Contig1_All	1.19221	2	1.06525	2	47.61	3	1879.17	-3.05994	102.118
lPAAYDDALNAIFWAk	1	CL4112.Contig3_All	1.35087	2	1.2359	2	47.61	3	2387.32	-2.86625	97.7309
eLSGIDLFk	1	CL2758.Contig2_All	0.968104	110	0.920863	110	47.6	2	1629.96	-4.71855	69.7254
aAFVLVAGGLGER	1	Unigene14725_All	1.14704	4	1.07759	4	47.59	3	1563.91	-2.95359	72.9257
yELNPDPETLDIVSTAAR	1	Unigene906_All	1.08065	4	1.05766	4	47.58	3	2308.19	-3.72343	69.7292
gASLFENDLYk	1	CL3937.Contig1_All	1.01685	1	1.06374	1	47.57	3	1865.02	-4.77155	63.2578
lILVGAPEkPLELPVFPLIIGR	1	CL2602.Contig2_All	1.36746	13	1.37093	13	47.56	5	2992.87	-2.43346	97.1564
eFGSLEALVHk	1	CL9357.Contig1_All	0.89139	2	0.80795	2	47.56	3	1838.06	-3.20726	71.7204
dIAGHSGEPVVSVASAAEDEEEPEFHDASDDRk	1	Unigene16618_All	1.09781	1	0.739874	1	47.56	5	4103.94	-3.42192	58.5775
iTEEGVTISQPYSLk	1	CL4952.Contig2_All	1.1267	3	1.27264	3	47.55	2	2273.28	-0.412687	60.8717
vFDTEEDLAVALAk	1	CL8293.Contig1_All	1.08741	3	1.14968	3	47.54	2	2129.19	-3.76293	84.4007
gVNWASFHPTLPLIVSGADDR	1	CL7700.Contig1_All	1.2751	2	0.928902	2	47.53	3	2556.35	0.374259	80.4366
dSAAVFAWk	1	CL3696.Contig1_All	0.785374	6	0.847124	6	47.51	2	1602.9	-5.75635	60.8485
gAEEQMEPLPPPVQLGEVSAEELk	1	Unigene6935_All	1.05299	2	1.10553	2	47.51	3	3185.68	-2.06424	74.9278
iFNLDLSHNk	1	Unigene18870_All	1.03396	6	0.903455	6	47.51	2	1809.05	-0.748965	63.3846
iMFALTSIk	1	CL236.Contig1_All	0.963317	30	0.989893	30	47.5	2	1631.99	-4.10095	83.201
lSGLSEEQISk	1	Unigene706_All	1.18711	1	1.19416	1	47.5	2	1799.03	-1.58641	52.9518
gREPSPEPLLR	1	Unigene12609_All	0.891169	1	0.91406	1	47.48	3	1554.89	1.18199	39.8114
iLVFDEADHmLAQSGFR	1	Unigene16822_All	0.994248	2	0.953193	2	47.47	3	2269.16	-1.49155	80.2363
iSVFDHVVR	1	CL5212.Contig1_All	1.14773	6	1.26464	6	47.46	3	1375.8	-1.50864	60.6445
eIHFFPFNPVDk	1	CL9622.Contig2_All	1.14172	7	1.27278	7	47.46	3	2098.15	-4.58384	72.7145
aAALAAILEAR	1	Unigene18624_All	1.06325	2	1.15345	2	47.43	3	1373.84	-2.52487	84.7102
lGDDEFGHmLAGILk	1	CL673.Contig2_All	1.4156	3	1.69184	3	47.42	3	2240.21	-3.06581	74.0096
gMPLEVITEFFAVGAk	1	CL6456.Contig3_All	0.845374	4	0.803876	4	47.42	3	2317.3	-1.76141	107.047
lLQSLSLEDIk	1	Unigene9354_All	0.749659	4	0.836705	4	47.41	3	1867.13	-4.08069	78.7199
sGSAADSQIVSDYVR	1	CL5398.Contig1_All	1.20621	5	1.00724	5	47.4	2	1858.94	-2.55534	52.4069
dLPGHLLR	1	CL2542.Contig2_All	1.18926	8	0.943741	8	47.4	3	1224.73	-1.44063	44.8073
iVDDHSIIQDEAR	1	CL673.Contig4_All	1.10963	4	1.09853	4	47.38	2	1814.95	-2.173	50.2422
dAILGVGGPAPILVSEGANTMDVGR	1	CL7712.Contig1_All	1.15823	1	1.21923	1	47.38	3	2713.46	3.25783	77.182
lELFDEADQILDk	1	CL6385.Contig2_All	0.943929	1	1.38433	1	47.36	3	2157.19	1.38373	91.3421
dSGESEEGNTAAELIDk	1	CL4873.Contig1_All	1.00335	2	1.21648	2	47.34	3	2373.18	-3.07865	52.6136
lGAAATAFLHk	1	Unigene12027_All	0.882442	2	0.860487	2	47.33	3	1708.03	-1.34388	69.2431
lVLDVVN	1	Unigene2532_All	1.27406	2	1.21692	2	47.31	2	1075.66	-2.31789	62.6126
sLEDLGMPEYNPIFLk	1	Unigene17136_All	1.2811	1	1.33362	1	47.31	3	2474.34	-1.65544	81.0265
hLELTYESAETQEDIk	1	CL967.Contig2_All	0.911999	1	1.13144	1	47.31	3	2514.31	-2.92008	54.9532
aDHFQANSENITLAGVR	1	Unigene20925_All	0.954219	1	0.733227	1	47.3	3	2147.11	-0.123994	53.4297
dNAPLIDVTQFGYFk	1	CL6441.Contig1_All	0.91595	5	1.03819	5	47.3	3	2336.27	-1.49296	79.4503
sYSPELIVHPILEESYSVR	1	Unigene5222_All	1.13974	1	1.06804	1	47.3	3	2522.34	-0.0709128	73.9166
gNDVDAIFDQAR	1	CL5328.Contig2_All	1.03037	3	1.05731	3	47.29	2	1624.82	-1.28427	58.9525
iWPTGSLEEYVQNLVk	1	CL8371.Contig1_All	2.61969	2	6.42164	2	47.29	3	2484.39	-3.77258	94.2951
tLFYTSLLYLTTTDHk	1	Unigene5197_All	2.03401	1	1.87772	1	47.29	4	2525.41	-1.01816	91.4842
gIVANLPAEkPPQEVTSEVk	1	CL2847.Contig2_All	1.1687	2	1.21773	2	47.29	5	3018.75	-3.06632	58.9468
lEGGSSPLVLDGVDLk	1	CL6846.Contig3_All	0.888071	3	1.1009	3	47.28	3	2207.27	-1.35681	70.1992
fEALGWNTITVDDTHSNMR	1	Unigene16134_All	1.14535	1	1.2156	1	47.28	3	2511.22	-1.51413	75.4038
fALLIEDLk	1	Unigene10106_All	0.894887	40	0.873519	40	47.27	2	1670.03	-3.91214	94.8893
vLEAVHIAANk	1	CL6537.Contig2_All	0.951792	4	1.17902	4	47.27	2	1773.08	-3.46217	64.9335
lVQNLSDDDFR	1	CL1269.Contig1_All	1.42901	3	1.38803	3	47.26	2	1625.84	-0.310025	59.8338
fALESFWDGk	1	CL9612.Contig2_All	0.87717	20	0.943763	20	47.26	2	1807.98	-3.91435	80.5314
sSAASTAVSIVDAIR	1	Unigene16619_All	1.11914	3	0.950612	3	47.25	3	1751.98	-2.38519	75.119
vQTALLQSDVHSk	1	Unigene21239_All	1.13582	2	1.03439	2	47.25	3	2034.18	-2.00947	51.0337
lMDIIINSLYSNk	1	Unigene18800_All	1.33473	8	1.28228	8	47.25	3	2132.22	-2.77139	105.048
dADGHGTHTASTAAGR	1	Unigene14461_All	1.2834	3	0.65161	3	47.23	4	1828.88	-1.30615	19.2988
iYEIVNELk	1	Unigene13871_All	0.901544	1	0.988071	1	47.22	3	1729.03	-3.17335	86.1732
lVLNPMSSLVDLPLk	1	Unigene13829_All	1.0638	1	1.31185	1	47.22	3	2247.36	-2.12301	86.9098
iGSQDVNDVLTAIDYAIDNR	1	Unigene536_All	0.960595	2	1.03468	2	47.22	3	2496.28	-2.51681	105.246
vFFDmTVGGQPLGR	1	CL5555.Contig1_All	1.27514	9	1.19645	9	47.21	3	1843.96	-3.41346	63.9113
dVVSADALVSR	1	Unigene5616_All	1.03366	10	1.04266	10	47.2	3	1435.81	-0.191638	47.6546
iPLLAFFSEDGR	1	Unigene16722_All	0.942253	4	0.911922	4	47.2	2	1668.92	-2.04452	95.1616
aAFDEEEk	1	CL95.Contig1_All	0.998679	6	1.14212	6	47.19	2	1546.81	-6.21563	37.8718
tVENAITEVAAMMGENVk	1	CL5112.Contig1_All	1.20786	3	1.02973	3	47.18	3	2515.33	-1.44947	97.9419
nVYEIHQMYETSFQSISDR	1	Unigene14518_All	0.842543	1	1.00238	1	47.17	3	2651.25	-7.51469	75.4151
nAHQLAMEIIR	1	CL8898.Contig1_All	1.07046	5	1.05427	5	47.16	3	1599.89	-2.0795	58.1277
iDQVLNEYLk	1	CL8923.Contig1_All	1.18093	2	1.32964	2	47.16	3	1843.07	-3.41959	81.2463
rDDGIYIINIGk	1	CL3621.Contig1_All	0.834396	11	0.968313	11	47.16	2	1985.16	-3.76774	60.6008
aEYAGTFAQVPHk	1	Unigene5487_All	1.14087	6	1.32741	6	47.16	3	2027.11	-1.90812	54.3938
eMVALSGSHTIGQAR	1	CL8974.Contig2_All	0.832391	3	0.862265	3	47.15	3	1860.98	-3.05052	49.4459
vSIDVPVSFVPGk	1	CL1830.Contig4_All	1.06627	2	1.05286	2	47.15	2	1952.17	0.0886084	68.4115
dIDNILILSGDHLYR	1	Unigene7265_All	1.01508	1	0.964513	1	47.15	3	2061.13	-0.850168	78.0571
iEAAMDVAESFAAMk	1	CL4360.Contig1_All	0.867008	4	1.03706	4	47.15	3	2192.14	-7.56171	104.357
vLIHTDVTk	1	CL5856.Contig1_All	1.03133	7	0.956215	7	47.14	2	1634	-3.31164	46.0328
tTLSGISFVNPSTPIR	1	Unigene9639_All	1.11818	3	0.945007	3	47.14	2	1994.13	5.5308	64.3294
sVAASESNATLGQQLHR	1	CL3457.Contig4_All	0.983255	1	0.987808	1	47.14	3	2073.1	-1.78971	45.4794
gSSVAIFGLGAVGLAAAEGAR	1	CL6693.Contig23_All	1.01828	1	1.10415	1	47.13	3	2178.23	3.73533	85.3894
yGIGEGEFGAAAPLR	1	CL1375.Contig2_All	1.06401	4	1.21249	4	47.11	3	1811.96	0.557979	59.1292
nLGHTGDVNLYAQMIDDAEGLEk	1	CL6870.Contig5_All	0.822806	4	0.880181	4	47.11	3	3111.59	1.98804	82.8229
lTNAEVVSILQYHALASYSPVGTLk	1	Unigene3844_All	1.16132	3	0.868546	3	47.11	3	3282.86	0.209939	88.196
yYGGNEYIDQIENLTR	1	Unigene9783_All	0.880521	4	0.963625	4	47.09	2	2252.13	5.68846	78.2965
dIPLETQFLLVETk	1	CL9597.Contig2_All	0.83558	1	1.70888	1	47.09	3	2254.31	-3.94692	80.9514
lQELNNAVAISTLTTk	1	CL661.Contig2_All	1.00552	2	1.0444	2	47.09	3	2324.35	-5.4288	77.0101
eYFQGYGEVLQAVVMR	1	CL6395.Contig1_All	1.09915	1	0.92858	1	47.07	3	2193.13	-2.1732	87.8639
hFTDAINLAPTNHVLYSNR	1	Unigene21049_All	1.14579	6	0.821025	6	47.07	3	2487.29	-4.41323	59.8164
eGNQNEWSQFQVFNDHk	1	CL2028.Contig6_All	0.861668	1	1.15469	1	47.07	3	2715.32	-4.56633	65.1514
nLATELGLHGIR	1	CL9650.Contig1_All	1.1497	1	1.25848	1	47.05	3	1597.93	-1.68558	62.3505
eLVDVEQYILAR	1	Unigene1084_All	1.06149	6	0.997974	6	47.05	3	1751.99	1.07422	85.1243
gIALHLASLGAk	1	Unigene12337_All	1.20112	5	2.5298	5	47.05	2	1759.1	-3.69107	62.2648
eSFEEYITSTVLPSLR	1	CL3631.Contig3_All	0.883135	2	0.977789	2	47.05	3	2175.15	0.058186	94.2513
[truncated: 15,482 more rows]
